# Supplementary material for: Imidazolium based energetic ionic liquids for monopropellant applications: a theoretical study
Source: Royal Society of Chemistry journal article supplement (doi:10.1039/c5ra09578f), 2015-01-01
Supplement: c5ra09578f1.pdf [file c5ra09578f1.pdf]

## Supporting Information

### **Imidazolium based energetic ionic liquids for monopropellant applications:**

#### **A theoretical study**

Eapen Thomas, Vijayalakshmi K.P.\* and Benny K. George  
Analytical and Spectroscopy Division, Analytical, Spectroscopy and Ceramics Group,  
Propellants, Polymers, Chemicals and Materials Entity,  
Vikram Sarabhai Space Centre, Thiruvananthapuram- 695022, India.

#### Captions

|                                                                                                                                                                                                                                                               |    |
|---------------------------------------------------------------------------------------------------------------------------------------------------------------------------------------------------------------------------------------------------------------|----|
| Part-I : Conformation Analysis .....                                                                                                                                                                                                                          | 3  |
| [1] 1-ethyl-3-methylimidazolium Cation .....                                                                                                                                                                                                                  | 3  |
| ○ Fig.S1 (a) Structure of [EMIm] <sup>+</sup> cation and (b) the energy profile for the rotation of the C-N bond (energy values in au and angle in degrees).                                                                                                  |    |
| ○ Fig. S2.The two different conformations obtained for 1-ethyl-3-methylimidazolium cation through the rotation of C-N bond. All distance parameters in Å and angle in degrees. The conformer in the left side is 0.295 kJ/mol more stable than the other..... | 3  |
| ○ X, Y, Z Cartesian coordinates of conformers (coordinates in Å and energy in au.)                                                                                                                                                                            |    |
| ○ The strategy used to locate various configurations of cation-anion complex.....                                                                                                                                                                             | 4  |
| ○ Fig. S3. The schematics showing the strategy used to search for the conformational space of the cation anion complex. The illustration is based on [EMIm] <sup>+</sup> [dtrz] <sup>-</sup> complex.....                                                     | 5  |
| [2] 1-ethyl-3-methylimidazolium tetrazolate.....                                                                                                                                                                                                              | 6  |
| ○ Fig. S4.Optimized conformers of 1-ethyl-3-methylimidazolium tetrazolate. All distance parameters in Å and energy in au. ....                                                                                                                                | 6  |
| ○ Table S1. Relative energy of the a-g conformations.....                                                                                                                                                                                                     | 6  |
| ○ X, Y, Z Cartesian coordinates of conformers (coordinates in Å and energy in au.).....                                                                                                                                                                       | 7  |
| [3] 1-ethyl-3-methylimidazolium-5-methyl tetrazolate .....                                                                                                                                                                                                    | 11 |
| ○ Fig. S5.Optimized conformers. ....                                                                                                                                                                                                                          | 11 |
| ○ Table S2. Relative energy of the a-g conformations. ....                                                                                                                                                                                                    | 11 |
| ○ Coordinates of conformers. ....                                                                                                                                                                                                                             | 12 |
| [4] 1-ethyl-3-methylimidazolium dicyanamide .....                                                                                                                                                                                                             | 13 |
| ○ Fig. S6.Optimized conformers. ....                                                                                                                                                                                                                          | 14 |
| ○ Table S3. Relative energy of the a-g conformations. ....                                                                                                                                                                                                    | 14 |
| ○ Coordinates of conformers. ....                                                                                                                                                                                                                             | 14 |
| [5] 1-ethyl-3-methylimidazolium-1,2,4-triazolate .....                                                                                                                                                                                                        | 17 |
| ○ Fig. S7. Optimized conformers. ....                                                                                                                                                                                                                         | 17 |
| ○ Table S4. Relative energy of the a-g conformations. ....                                                                                                                                                                                                    | 17 |
| ○ Coordinates of conformers. ....                                                                                                                                                                                                                             | 17 |
| [6] 1-ethyl-3-methylimidazolium dinitrotriazine .....                                                                                                                                                                                                         | 19 |
| ○ Fig. S8.Optimized conformers. ....                                                                                                                                                                                                                          | 19 |
| ○ Table S5. Relative energy of the a-g conformations. ....                                                                                                                                                                                                    | 19 |
| ○ Coordinates of conformers. ....                                                                                                                                                                                                                             | 20 |
| [7] 1-ethyl-3-methylimidazolium dinitramine .....                                                                                                                                                                                                             | 22 |
| ○ Fig.S9.Optimized conformers.                                                                                                                                                                                                                                |    |
| ○ Table S6. Relative energy of the a-g conformations.                                                                                                                                                                                                         |    |
| ○ Coordinates of conformers.                                                                                                                                                                                                                                  |    |

|                                                                                                                                       |    |
|---------------------------------------------------------------------------------------------------------------------------------------|----|
| [8] 1-ethyl-3-methylimidazolium-5-cyano tetrazolate.....                                                                              | 24 |
| ○ Fig. S10.Optimized conformers.                                                                                                      |    |
| ○ Table S7. Relative energy of the a-g conformations.                                                                                 |    |
| ○ Coordinates of conformers.                                                                                                          |    |
| [9] 1-ethyl-3-methylimidazolium-5-amino tetrazolate .....                                                                             | 27 |
| ○ Fig. S11.Optimized conformers.                                                                                                      |    |
| ○ Table S8. Relative energy of the a-g conformations.                                                                                 |    |
| ○ Coordinates of conformers.                                                                                                          |    |
| [10] 1-ethyl-3-methylimidazolium-5-nitro tetrazolate .....                                                                            | 30 |
| ○ Fig. S12.Optimized conformers.                                                                                                      |    |
| ○ Table S9. Relative energy of the a-g conformations.                                                                                 |    |
| ○ Coordinates of conformers.                                                                                                          |    |
| [11] 1-ethyl-3-methylimidazolium-5-nitro tetrazolate-1N-oxide .....                                                                   | 33 |
| ○ Fig. S13.Optimized conformers.                                                                                                      |    |
| ○ Table S10. Relative energy of the a-g conformations.                                                                                |    |
| ○ Coordinates of conformers.                                                                                                          |    |
| [12] 1-ethyl-3-methylimidazolium tetrafluoroborate .....                                                                              | 35 |
| [13] 1-ethyl-3-methylimidazolium hexafluorophosphate .....                                                                            | 36 |
| Part-II : Thermochemical data from G3MP2 calculations .....                                                                           | 36 |
| Part-III : Theoretical density specific impulse of selected EILs.....                                                                 | 49 |
| Table S11: Theoretical density specific impulse of EILs .....                                                                         | 49 |
| Part-IV : Thermochemical calculation exemplified for [EMIm] <sup>+</sup> [dn] <sup>-</sup> .....                                      | 50 |
| Table S12: Energy parameters for [EMIm] <sup>+</sup> [dn] <sup>-</sup> (Experimental values in kcal/mol and G3MP2 values in au) ..... | 50 |
| Part-V : Energetics for conformers of [EMIm] <sup>+</sup> [dn] <sup>-</sup> .....                                                     | 51 |
| Table S13: Energy parameters for [EMIm] <sup>+</sup> [dn] <sup>-</sup> at M06L/6-311+g(d,p) level.....                                | 51 |
| Table S14. Mole fraction of carbon in EIL and in presence of oxidizer.....                                                            | 51 |
| Table S15. Isp values (in s) of EILs at various HAN concentration.                                                                    |    |
| Figure S14: Plot showing the variation of Isp with respect to increasing concentration of HAN. ....                                   | 52 |

## Part-I : Conformation Analysis

### [1] 1-ethyl-3-methylimidazolium Cation [EMIm]<sup>+</sup>

Imidazolium cation exists in two different conformations. We obtained these conformations by rotating the ethyl group around the C-N bond (Fig. S1). This is done by varying the dihedral angle ( $\theta$ ) defined by the four atoms colored in blue in the order CH<sub>3</sub>-CH<sub>2</sub>-N(ring)-CH(ring). The  $\theta$  is varied from 0.0° to 360.0° in increments of 10°. Because of the planar symmetry of the molecule at  $\theta = 0.0^\circ$  and  $\theta = 180.0^\circ$ , the energy profile for the rotation values in the range 180.0° - 360.0° is same as that in the range 180° to 0.0°. The methyl group always showed a fixed orientation wherein a cis-arrangement of one of its CH bond with respect to the CH bond of the ring juxtaposed with the two nitrogen atoms.

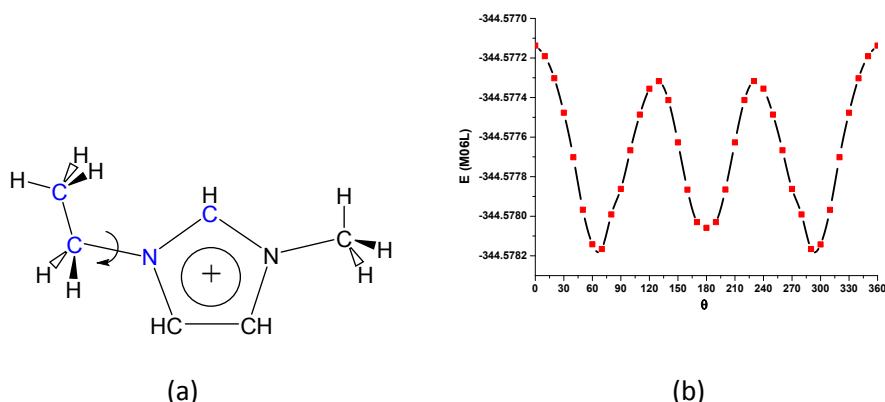

Fig. S1 (a) Structure of [EMIm]<sup>+</sup> cation and (b) the energy profile for the rotation of the C-N bond (energy values in au and angle in degrees).

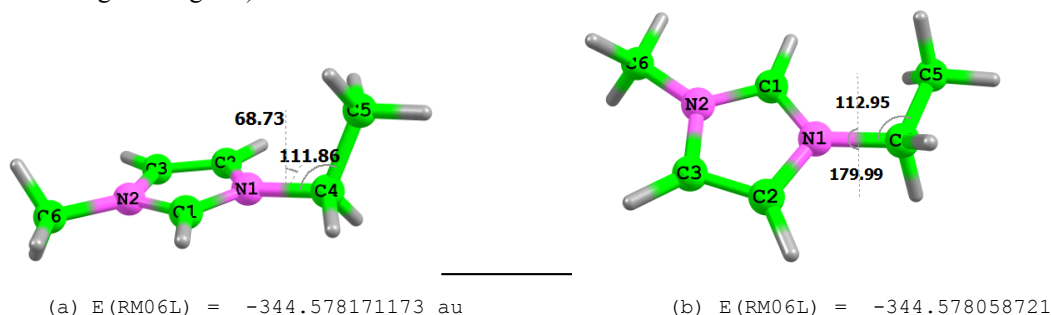

Fig. S2. The two different conformations obtained for 1-ethyl-3-methylimidazolium cation through the rotation of C-N bond. All distance parameters in Å and angle in degrees. The conformer in the left side is 0.295 kJ/mol more stable than the other.

### X, Y, Z Cartesian coordinates of conformers (coordinates in Å and energy in au.)

(a) E(RM06L) = -344.578171173

|   |              |              |              |
|---|--------------|--------------|--------------|
| 7 | 0.618025000  | -0.017179000 | -0.312787000 |
| 6 | -0.426176000 | -0.836193000 | -0.177711000 |
| 6 | 0.177681000  | 1.278916000  | -0.169255000 |
| 6 | -1.162428000 | 1.226227000  | 0.051483000  |
| 7 | -1.521648000 | -0.103641000 | 0.043416000  |
| 1 | -1.886048000 | 2.008795000  | 0.206994000  |

|   |              |              |              |
|---|--------------|--------------|--------------|
| 1 | 0.847374000  | 2.119653000  | -0.242349000 |
| 6 | 2.019642000  | -0.429008000 | -0.533634000 |
| 1 | 1.993204000  | -1.484895000 | -0.807744000 |
| 1 | 2.376283000  | 0.123334000  | -1.406057000 |
| 6 | 2.878472000  | -0.180282000 | 0.685864000  |
| 1 | 2.521432000  | -0.744332000 | 1.549367000  |
| 1 | 2.905834000  | 0.877905000  | 0.952533000  |
| 6 | -2.873462000 | -0.623472000 | 0.234704000  |
| 1 | -2.848500000 | -1.709291000 | 0.181162000  |
| 1 | -3.247930000 | -0.318229000 | 1.211212000  |
| 1 | -3.527652000 | -0.238633000 | -0.546983000 |
| 1 | 3.902024000  | -0.493729000 | 0.478436000  |
| 1 | -0.393028000 | -1.911968000 | -0.239673000 |

(b) E (RM06L) = -344.578058721

|   |              |              |              |
|---|--------------|--------------|--------------|
| 7 | 0.641358000  | 0.408058000  | -0.000063000 |
| 6 | -0.169257000 | -0.652614000 | -0.000032000 |
| 6 | -0.133157000 | 1.547173000  | -0.000009000 |
| 6 | -1.433106000 | 1.151490000  | 0.000030000  |
| 7 | -1.435469000 | -0.224877000 | 0.000001000  |
| 1 | -2.346346000 | 1.722809000  | 0.000160000  |
| 1 | 0.305425000  | 2.531438000  | 0.000013000  |
| 6 | 2.121197000  | 0.392547000  | -0.000017000 |
| 1 | 2.437277000  | 0.956359000  | -0.881202000 |
| 1 | 2.437195000  | 0.956427000  | 0.881157000  |
| 6 | 2.694042000  | -1.000984000 | 0.000064000  |
| 1 | 2.405911000  | -1.564540000 | -0.890212000 |
| 1 | 2.405925000  | -1.564431000 | 0.890408000  |
| 6 | -2.622753000 | -1.076021000 | 0.000010000  |
| 1 | -2.313702000 | -2.118528000 | -0.000087000 |
| 1 | -3.216877000 | -0.875843000 | 0.890968000  |
| 1 | -3.216989000 | -0.875702000 | -0.890840000 |
| 1 | 3.781762000  | -0.934790000 | 0.000015000  |
| 1 | 0.137405000  | -1.685014000 | -0.000219000 |

### **The strategy used to locate various configurations of cation-anion complex.**

The schematic shown in Fig.S3 (blue is cation and red is anion) is useful to explain the conformational space we scanned for the cation-anion complex. The illustration is based on [EMIm]<sup>+</sup>[dtrz]<sup>-</sup> complex. To generate an initial structure of the cation-anion complex, we used the Chemcraft program to place the cation above the  $\pi$ -region of the anion to obtain a parallel orientation of its ring with respect to the ring of the anion while the distance between the centres of the two rings is selected close to 3.5 Å. While selecting this orientation, one of the ring atoms of the anion is oriented close to the C2 carbon of the cation. The initial geometry of another configuration is made in a similar manner but the nearest ring atom of the anion from C2 is changed. This way we can generate 5 initial structures (a -e). Also we used four different orientations for the in-plane configuration of the cation-anion complex as shown in (f - i). This exercise is done for all the tetrazolate and triazolate anions with both conformations obtained for the cation. For the open structures, viz. [dc]<sup>-</sup> and [dn]<sup>-</sup>, the conformational space is scanned by

orienting the central nitrogen towards the  $\pi$ -region of the cation or that nitrogen orienting away from the  $\pi$ -region. Also the in plane configurations are considered.

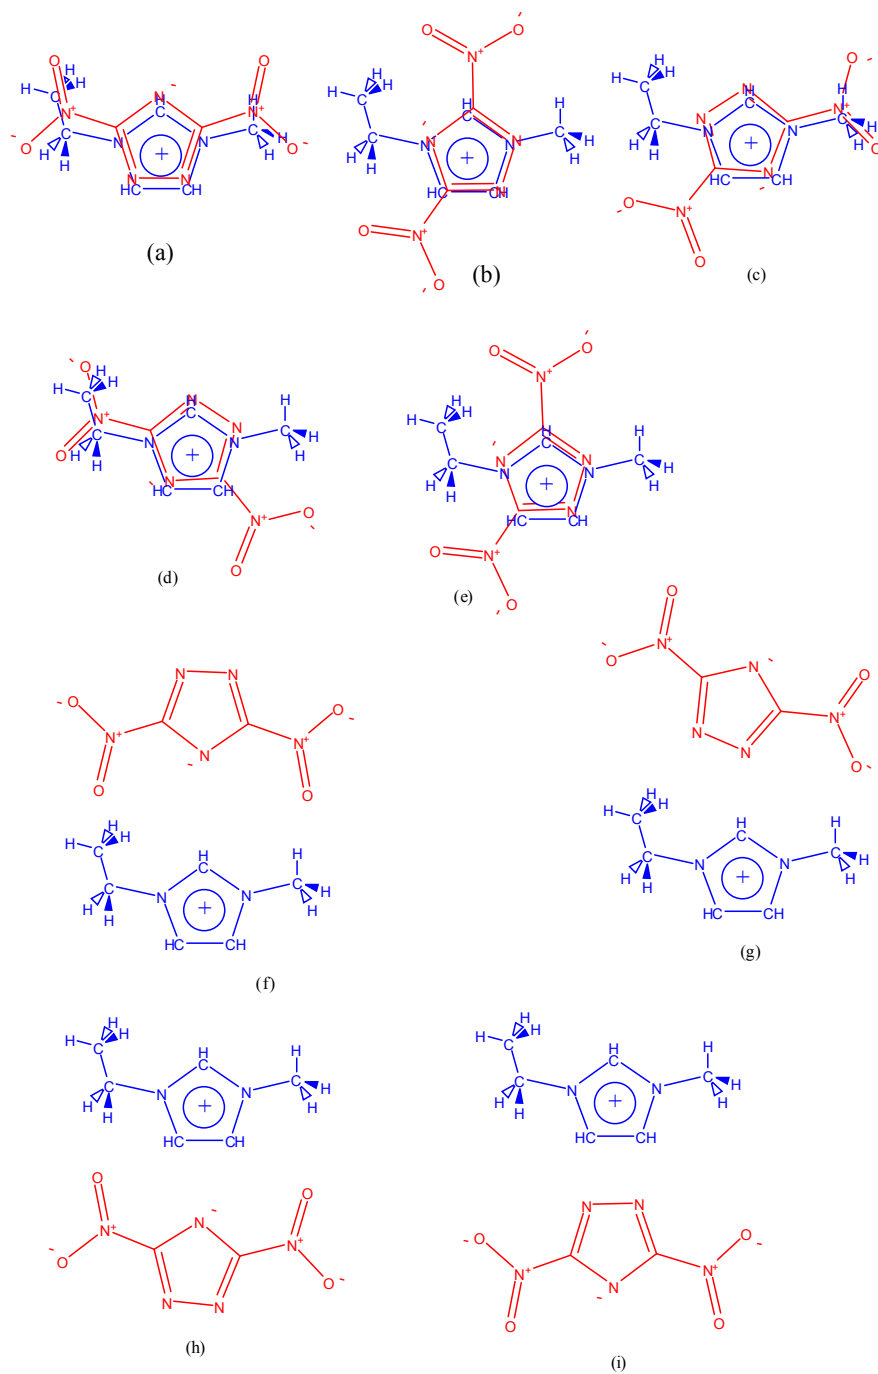

Fig. S3. The schematics showing the strategy used to search for the conformational space of the cation anion complex. The illustration is based on  $[\text{EMIm}]^+[\text{dtrz}]^-$  complex.

**[2] 1-ethyl-3-methylimidazolium tetrazolate ( $[\text{EMIm}]^+[\text{tz}]^-$ )**

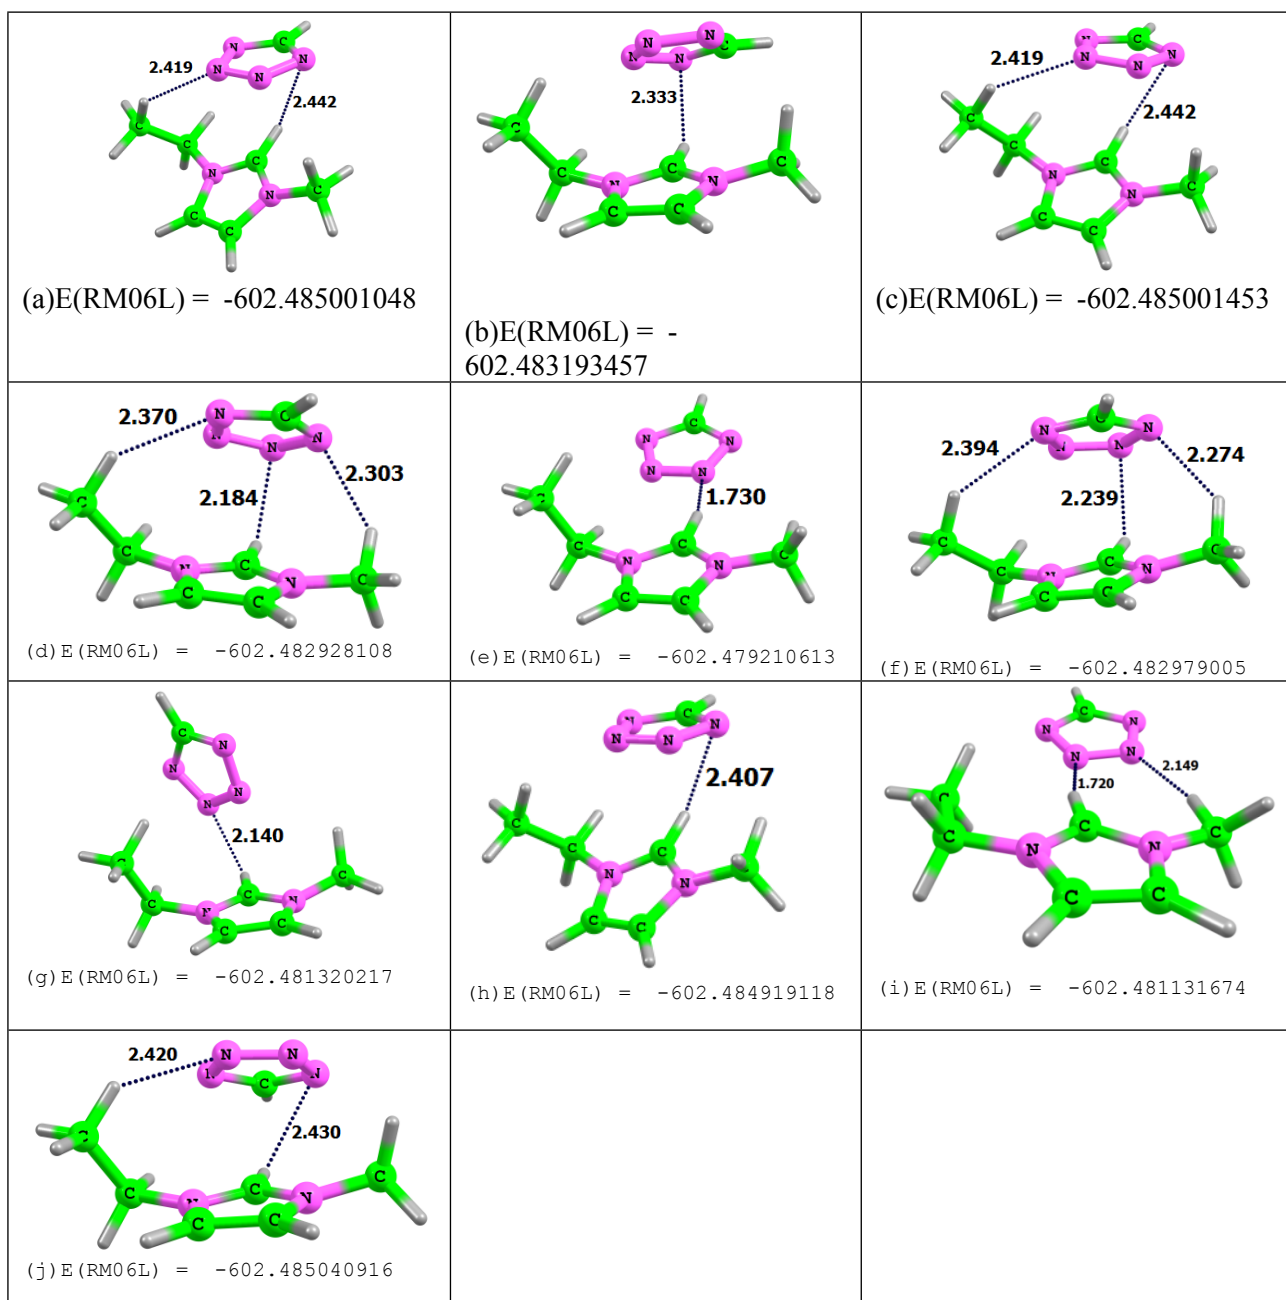

Fig. S4. Optimized conformers of 1-ethyl-3-methylimidazolium tetrazolate. All distance parameters in Å and energy in au.

Table S1. Relative energy of the a-j conformations.

| Conformation | Rel. Energy (kJ/mol) |
|--------------|----------------------|
| a            | 0.1046               |
| b            | 4.8459               |
| c            | 0.1035               |
| d            | 5.5419               |

|   |         |
|---|---------|
| e | 15.2928 |
| f | 5.4084  |
| g | 9.7594  |
| h | 0.3195  |
| i | 10.2539 |
| j | 0.0000  |

**X, Y, Z Cartesian coordinates of conformers (coordinates in Å and energy in au.)**

a) E(RM06L) = -602.485001048

|   |              |              |              |
|---|--------------|--------------|--------------|
| 7 | -1.256492000 | -0.874668000 | 0.981639000  |
| 7 | -1.734818000 | -1.578790000 | -0.060882000 |
| 7 | -1.790065000 | 0.339919000  | 0.982080000  |
| 7 | -2.629754000 | 0.466561000  | -0.060844000 |
| 6 | -2.575045000 | -0.727668000 | -0.665202000 |
| 1 | -3.160293000 | -0.983158000 | -1.538294000 |
| 7 | 1.450163000  | -0.283593000 | -0.470946000 |
| 6 | 0.419089000  | 0.522491000  | -0.718125000 |
| 6 | 2.392064000  | 0.419849000  | 0.247290000  |
| 6 | 1.909983000  | 1.679748000  | 0.411364000  |
| 7 | 0.682018000  | 1.727812000  | -0.211958000 |
| 1 | -0.495217000 | 0.241422000  | -1.224592000 |
| 1 | 2.326344000  | 2.538151000  | 0.910312000  |
| 1 | 3.314705000  | -0.029863000 | 0.571823000  |
| 6 | -0.295544000 | 2.805693000  | -0.114288000 |
| 1 | -0.953001000 | 2.771134000  | -0.980628000 |
| 1 | -0.904122000 | 2.640618000  | 0.777303000  |
| 1 | 0.230216000  | 3.759068000  | -0.078713000 |
| 6 | 1.459723000  | -1.730677000 | -0.750326000 |
| 1 | 0.519162000  | -1.940326000 | -1.264046000 |
| 1 | 2.292252000  | -1.931390000 | -1.431844000 |
| 6 | 1.541954000  | -2.536374000 | 0.526895000  |
| 1 | 0.702396000  | -2.280441000 | 1.176560000  |
| 1 | 2.482203000  | -2.365569000 | 1.058375000  |
| 1 | 1.484639000  | -3.598700000 | 0.284463000  |

b) E(RM06L) = -602.483193457

|   |              |              |              |
|---|--------------|--------------|--------------|
| 7 | -1.333086000 | -1.666539000 | -0.007275000 |
| 7 | -2.316011000 | -1.182476000 | -0.787363000 |
| 7 | -1.160447000 | -0.872626000 | 1.042342000  |
| 7 | -2.031042000 | 0.152507000  | 0.980609000  |
| 6 | -2.718588000 | -0.078728000 | -0.144600000 |
| 1 | -3.527404000 | 0.551486000  | -0.492414000 |
| 7 | 1.489390000  | -0.105194000 | -0.461194000 |
| 6 | 0.370566000  | 0.558833000  | -0.748505000 |
| 6 | 2.293080000  | 0.702572000  | 0.311146000  |
| 6 | 1.639000000  | 1.882197000  | 0.471662000  |
| 7 | 0.446759000  | 1.777585000  | -0.210084000 |
| 1 | -0.477153000 | 0.161629000  | -1.294234000 |
| 1 | 1.911875000  | 2.777908000  | 1.002688000  |
| 1 | 3.250402000  | 0.372013000  | 0.675548000  |
| 6 | -0.646454000 | 2.739609000  | -0.171931000 |
| 1 | -1.248884000 | 2.628848000  | -1.072067000 |
| 1 | -1.272042000 | 2.525221000  | 0.696663000  |
| 1 | -0.232131000 | 3.746405000  | -0.131088000 |
| 6 | 1.716526000  | -1.532132000 | -0.753678000 |
| 1 | 0.850750000  | -1.859692000 | -1.330732000 |
| 1 | 2.612107000  | -1.601662000 | -1.378856000 |
| 6 | 1.829567000  | -2.335729000 | 0.522351000  |
| 1 | 0.931054000  | -2.198046000 | 1.126554000  |
| 1 | 2.709072000  | -2.052604000 | 1.107044000  |
| 1 | 1.921219000  | -3.394031000 | 0.272972000  |

c) E(RM06L) = -602.485001453

|   |              |              |              |
|---|--------------|--------------|--------------|
| 7 | -1.788725000 | 0.338389000  | 0.982904000  |
| 7 | -2.629256000 | 0.466407000  | -0.059321000 |
| 7 | -1.255614000 | -0.876301000 | 0.980772000  |
| 7 | -1.735014000 | -1.579279000 | -0.062106000 |
| 6 | -2.575449000 | -0.727223000 | -0.664844000 |
| 1 | -3.161070000 | -0.981475000 | -1.538050000 |
| 7 | 1.449792000  | -0.283146000 | -0.471043000 |
| 6 | 0.418670000  | 0.522803000  | -0.718271000 |
| 6 | 2.391631000  | 0.420383000  | 0.247202000  |
| 6 | 1.909389000  | 1.680223000  | 0.411286000  |
| 7 | 0.681452000  | 1.728185000  | -0.212145000 |
| 1 | -0.495532000 | 0.241671000  | -1.224886000 |
| 1 | 2.325514000  | 2.538655000  | 0.910349000  |
| 1 | 3.314215000  | -0.029257000 | 0.571985000  |
| 6 | -0.296442000 | 2.805721000  | -0.114194000 |
| 1 | -0.953207000 | 2.771884000  | -0.981072000 |
| 1 | -0.905534000 | 2.639546000  | 0.776840000  |
| 1 | 0.229059000  | 3.759162000  | -0.077165000 |
| 6 | 1.459557000  | -1.730255000 | -0.750385000 |
| 1 | 0.518510000  | -1.940196000 | -1.263119000 |
| 1 | 2.291494000  | -1.930716000 | -1.432694000 |
| 6 | 1.543264000  | -2.535910000 | 0.526773000  |
| 1 | 0.704311000  | -2.280337000 | 1.177366000  |
| 1 | 2.484032000  | -2.364932000 | 1.057294000  |
| 1 | 1.486038000  | -3.598239000 | 0.284320000  |

d) E (RM06L) = -602.482928108

|   |              |              |              |
|---|--------------|--------------|--------------|
| 7 | -1.430977000 | -1.734578000 | -0.899684000 |
| 7 | -2.222406000 | -1.143741000 | 0.017312000  |
| 7 | -0.291903000 | -2.101740000 | -0.331255000 |
| 7 | -0.305079000 | -1.763949000 | 0.971899000  |
| 6 | -1.501164000 | -1.190390000 | 1.143240000  |
| 1 | -1.852891000 | -0.814689000 | 2.095654000  |
| 7 | 1.253415000  | 0.684862000  | -0.390134000 |
| 6 | 0.008630000  | 0.763262000  | -0.858042000 |
| 6 | 1.405798000  | 1.613633000  | 0.613706000  |
| 6 | 0.217273000  | 2.260922000  | 0.742266000  |
| 7 | -0.642588000 | 1.713936000  | -0.183550000 |
| 1 | -0.437109000 | 0.088607000  | -1.577699000 |
| 1 | -0.093721000 | 3.044238000  | 1.412226000  |
| 1 | 2.329419000  | 1.724125000  | 1.154787000  |
| 6 | -2.058543000 | 2.024484000  | -0.356221000 |
| 1 | -2.601883000 | 1.079228000  | -0.449218000 |
| 1 | -2.403322000 | 2.556996000  | 0.528175000  |
| 1 | -2.202864000 | 2.652542000  | -1.236495000 |
| 6 | 2.250669000  | -0.311222000 | -0.828548000 |
| 1 | 1.708028000  | -1.001658000 | -1.476225000 |
| 1 | 3.005120000  | 0.218527000  | -1.419395000 |
| 6 | 2.847438000  | -1.055726000 | 0.342844000  |
| 1 | 2.052724000  | -1.532467000 | 0.921361000  |
| 1 | 3.433344000  | -0.400044000 | 0.992752000  |
| 1 | 3.519317000  | -1.828715000 | -0.033517000 |

e) E (RM06L) = -602.479210613

|   |              |              |              |
|---|--------------|--------------|--------------|
| 7 | 2.079946000  | 0.511321000  | -0.212088000 |
| 7 | 3.389976000  | 0.738908000  | -0.117522000 |
| 7 | 1.848844000  | -0.790688000 | -0.069058000 |
| 7 | 2.993774000  | -1.447745000 | 0.125656000  |
| 6 | 3.912812000  | -0.477071000 | 0.087887000  |
| 1 | 4.971486000  | -0.656418000 | 0.211542000  |
| 7 | -1.495105000 | 0.775000000  | -0.312804000 |
| 6 | -0.967778000 | -0.443500000 | -0.164251000 |
| 6 | -2.866457000 | 0.694366000  | -0.194382000 |
| 6 | -3.174289000 | -0.611204000 | 0.021695000  |
| 7 | -1.978272000 | -1.299105000 | 0.039209000  |
| 1 | 0.122609000  | -0.718970000 | -0.164746000 |
| 1 | -4.122150000 | -1.104124000 | 0.157665000  |
| 1 | -3.497800000 | 1.563120000  | -0.279378000 |
| 6 | -1.804157000 | -2.729532000 | 0.242047000  |
| 1 | -0.738406000 | -2.950822000 | 0.245394000  |



|   |              |              |              |
|---|--------------|--------------|--------------|
| 1 | -2.237027000 | -3.025362000 | 1.198119000  |
| 1 | -2.286862000 | -3.284818000 | -0.562841000 |
| 6 | -0.706925000 | 2.009829000  | -0.492497000 |
| 1 | 0.296577000  | 1.688093000  | -0.792654000 |
| 1 | -1.179853000 | 2.573009000  | -1.301311000 |
| 6 | -0.630128000 | 2.802567000  | 0.792908000  |
| 1 | -0.120204000 | 2.223243000  | 1.565418000  |
| 1 | -1.615749000 | 3.098410000  | 1.163505000  |
| 1 | -0.045221000 | 3.708074000  | 0.625080000  |

f) E (RM06L) = -602.482979005

|   |              |              |              |
|---|--------------|--------------|--------------|
| 7 | 0.024032000  | -2.135796000 | -0.370404000 |
| 7 | 0.026595000  | -1.821148000 | 0.939061000  |
| 7 | -1.174279000 | -1.900617000 | -0.883623000 |
| 7 | -1.990915000 | -1.423589000 | 0.077189000  |
| 6 | -1.220222000 | -1.396243000 | 1.169957000  |
| 1 | -1.571535000 | -1.076203000 | 2.142590000  |
| 7 | 1.108596000  | 0.851955000  | -0.382307000 |
| 6 | -0.124632000 | 0.778659000  | -0.881837000 |
| 6 | 1.108758000  | 1.753729000  | 0.656961000  |
| 6 | -0.160901000 | 2.226256000  | 0.774889000  |
| 7 | -0.915855000 | 1.606428000  | -0.194432000 |
| 1 | -0.454792000 | 0.080466000  | -1.638596000 |
| 1 | -0.592307000 | 2.929357000  | 1.466418000  |
| 1 | 1.993823000  | 1.967567000  | 1.229900000  |
| 6 | -2.363102000 | 1.692870000  | -0.368956000 |
| 1 | -2.767017000 | 0.674898000  | -0.327746000 |
| 1 | -2.771167000 | 2.294312000  | 0.440816000  |
| 1 | -2.598297000 | 2.165159000  | -1.323529000 |
| 6 | 2.242686000  | 0.027521000  | -0.846173000 |
| 1 | 1.794261000  | -0.764159000 | -1.449877000 |
| 1 | 2.870845000  | 0.659663000  | -1.481980000 |
| 6 | 3.006439000  | -0.575043000 | 0.308683000  |
| 1 | 2.328491000  | -1.164000000 | 0.931081000  |
| 1 | 3.507485000  | 0.182693000  | 0.917500000  |
| 1 | 3.778835000  | -1.236867000 | -0.086111000 |

g) E (RM06L) = -602.481320217

|   |              |              |              |
|---|--------------|--------------|--------------|
| 7 | 1.586234000  | -0.532897000 | -0.915542000 |
| 7 | 2.856193000  | -0.201991000 | -0.673987000 |
| 7 | 1.066779000  | -1.135362000 | 0.156958000  |
| 7 | 1.987490000  | -1.210025000 | 1.122274000  |
| 6 | 3.065521000  | -0.633332000 | 0.576401000  |
| 1 | 4.010225000  | -0.529287000 | 1.091871000  |
| 7 | -1.149119000 | 1.106074000  | -0.345635000 |
| 6 | -1.134567000 | -0.129950000 | -0.842372000 |
| 6 | -2.045972000 | 1.148692000  | 0.703261000  |
| 6 | -2.587668000 | -0.090862000 | 0.813615000  |
| 7 | -2.021590000 | -0.870820000 | -0.174222000 |
| 1 | -0.440645000 | -0.471089000 | -1.598728000 |
| 1 | -3.322808000 | -0.483940000 | 1.494619000  |
| 1 | -2.224622000 | 2.049568000  | 1.264910000  |
| 6 | -2.053951000 | -2.323018000 | -0.249397000 |
| 1 | -1.126723000 | -2.703128000 | 0.187853000  |
| 1 | -2.921849000 | -2.689415000 | 0.295468000  |
| 1 | -2.122067000 | -2.637714000 | -1.289928000 |
| 6 | -0.161598000 | 2.141159000  | -0.692691000 |
| 1 | 0.393657000  | 1.750854000  | -1.546976000 |
| 1 | -0.708574000 | 3.035281000  | -1.006574000 |
| 6 | 0.772412000  | 2.410867000  | 0.467371000  |
| 1 | 1.271041000  | 1.492419000  | 0.783504000  |
| 1 | 0.244573000  | 2.840570000  | 1.322866000  |
| 1 | 1.540817000  | 3.119679000  | 0.155070000  |

h) E (RM06L) = -602.484919118

|   |              |              |              |
|---|--------------|--------------|--------------|
| 7 | -1.791618000 | 0.386440000  | 0.988951000  |
| 7 | -2.608310000 | 0.557607000  | -0.067221000 |
| 7 | -1.314460000 | -0.850436000 | 0.985958000  |
| 7 | -1.805892000 | -1.524905000 | -0.070941000 |
| 6 | -2.596819000 | -0.633051000 | -0.681848000 |
| 1 | -3.177358000 | -0.854641000 | -1.567340000 |

|   |              |              |              |
|---|--------------|--------------|--------------|
| 7 | 1.441752000  | -0.331569000 | -0.469131000 |
| 6 | 0.431455000  | 0.506973000  | -0.691219000 |
| 6 | 2.421380000  | 0.340596000  | 0.229651000  |
| 6 | 1.982644000  | 1.614432000  | 0.406656000  |
| 7 | 0.740057000  | 1.699569000  | -0.182802000 |
| 1 | -0.498134000 | 0.257492000  | -1.186327000 |
| 1 | 2.435310000  | 2.456376000  | 0.901874000  |
| 1 | 3.332555000  | -0.141546000 | 0.539939000  |
| 6 | -0.175006000 | 2.833620000  | -0.125177000 |
| 1 | -1.160767000 | 2.495300000  | -0.445572000 |
| 1 | -0.257158000 | 3.164915000  | 0.909268000  |
| 1 | 0.193897000  | 3.644366000  | -0.755519000 |
| 6 | 1.397151000  | -1.777844000 | -0.749607000 |
| 1 | 0.450205000  | -1.951863000 | -1.264774000 |
| 1 | 2.222055000  | -2.007709000 | -1.431095000 |
| 6 | 1.449295000  | -2.587781000 | 0.526376000  |
| 1 | 0.616342000  | -2.306515000 | 1.174269000  |
| 1 | 2.393034000  | -2.447363000 | 1.060525000  |
| 1 | 1.358718000  | -3.647421000 | 0.282061000  |

i) E(RM06L) = -602.481131674

|   |              |              |              |
|---|--------------|--------------|--------------|
| 7 | -2.208910000 | -0.936465000 | 0.038932000  |
| 7 | -3.529785000 | -0.948617000 | -0.137048000 |
| 7 | -1.791317000 | 0.320969000  | 0.134214000  |
| 7 | -2.819635000 | 1.165303000  | 0.018801000  |
| 6 | -3.865608000 | 0.348122000  | -0.143640000 |
| 1 | -4.880257000 | 0.699101000  | -0.268332000 |
| 7 | 2.075077000  | 0.636269000  | -0.034334000 |
| 6 | 0.999171000  | -0.153635000 | 0.079306000  |
| 6 | 3.206032000  | -0.146981000 | -0.147268000 |
| 6 | 2.794424000  | -1.440376000 | -0.099320000 |
| 7 | 1.423622000  | -1.421879000 | 0.040669000  |
| 1 | -0.077412000 | 0.172599000  | 0.155253000  |
| 1 | 3.350704000  | -2.361227000 | -0.151402000 |
| 1 | 4.189261000  | 0.280182000  | -0.251114000 |
| 6 | 0.543053000  | -2.585933000 | 0.134918000  |
| 1 | -0.497694000 | -2.234076000 | 0.122925000  |
| 1 | 0.727964000  | -3.241859000 | -0.716171000 |
| 1 | 0.751802000  | -3.123849000 | 1.060842000  |
| 6 | 2.048648000  | 2.108245000  | -0.053772000 |
| 1 | 2.721543000  | 2.449277000  | 0.739187000  |
| 1 | 2.485332000  | 2.424179000  | -1.006230000 |
| 6 | 0.656750000  | 2.664837000  | 0.124634000  |
| 1 | 0.209653000  | 2.358469000  | 1.072245000  |
| 1 | -0.024953000 | 2.348323000  | -0.666889000 |
| 1 | 0.705873000  | 3.754142000  | 0.111902000  |

j) E(RM06L) = -602.485040916

|   |              |              |              |
|---|--------------|--------------|--------------|
| 7 | -1.259951000 | -0.878590000 | 0.986703000  |
| 7 | -1.724138000 | -1.592705000 | -0.056261000 |
| 7 | -1.801259000 | 0.332097000  | 0.976173000  |
| 7 | -2.633196000 | 0.446334000  | -0.074688000 |
| 6 | -2.565076000 | -0.751175000 | -0.672232000 |
| 1 | -3.140895000 | -1.015276000 | -1.549066000 |
| 7 | 1.460061000  | -0.271978000 | -0.472347000 |
| 6 | 0.413838000  | 0.517122000  | -0.710187000 |
| 6 | 2.396943000  | 0.447432000  | 0.237487000  |
| 6 | 1.896354000  | 1.699159000  | 0.405347000  |
| 7 | 0.660668000  | 1.725623000  | -0.205079000 |
| 1 | -0.498047000 | 0.222802000  | -1.213568000 |
| 1 | 2.302711000  | 2.563930000  | 0.901648000  |
| 1 | 3.328352000  | 0.011892000  | 0.556527000  |
| 6 | -0.326220000 | 2.794479000  | -0.112838000 |
| 1 | -1.157157000 | 2.561640000  | -0.776292000 |
| 1 | -0.722011000 | 2.819045000  | 0.902991000  |
| 1 | 0.137381000  | 3.743253000  | -0.384390000 |
| 6 | 1.490062000  | -1.719543000 | -0.746241000 |
| 1 | 0.561332000  | -1.942137000 | -1.275544000 |
| 1 | 2.335417000  | -1.912523000 | -1.413976000 |
| 6 | 1.562626000  | -2.519191000 | 0.535460000  |

|   |             |              |             |
|---|-------------|--------------|-------------|
| 1 | 0.710846000 | -2.271486000 | 1.172216000 |
| 1 | 2.492482000 | -2.333073000 | 1.079985000 |
| 1 | 1.523139000 | -3.583230000 | 0.297187000 |

[3] 1-ethyl-3-methylimidazolium 5-methyl tetrazolate ([EMIm]<sup>+</sup>[mtz]<sup>-</sup>)

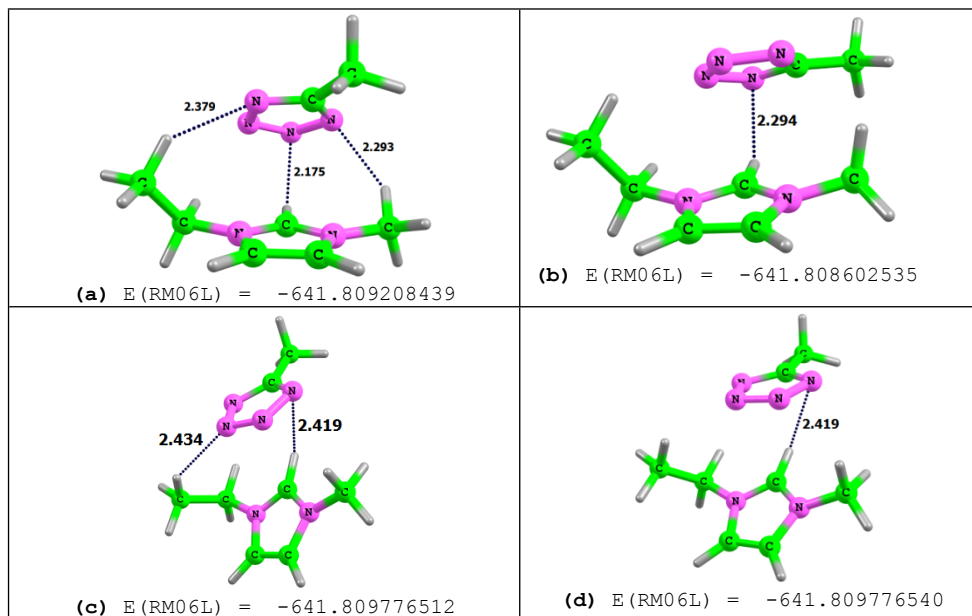

Fig. S5. Optimized conformers of 1-ethyl-3-methylimidazolium 5-methyl tetrazolate. All distance parameters in Å and energy in au.

Table S2. Relative energy of the a-d conformations.

| Conformation | Rel. Energy (kJ/mol) |
|--------------|----------------------|
| a            | 1.4901               |
| b            | 3.0794               |
| c            | 0.0001               |
| d            | 0.0000               |

X, Y, Z Cartesian coordinates of conformers (coordinates in Å and energy in au.)

(a)  $E(\text{RM06L}) = -641.809208439$

|   |              |              |              |
|---|--------------|--------------|--------------|
| 7 | -1.294161000 | -1.496106000 | -1.406341000 |
| 7 | -2.117214000 | -0.791230000 | -0.604450000 |
| 7 | -0.329545000 | -2.036684000 | -0.679355000 |
| 7 | -0.495836000 | -1.702236000 | 0.613991000  |
| 6 | -1.602358000 | -0.945646000 | 0.624314000  |
| 7 | 1.563246000  | 0.530332000  | -0.282926000 |
| 6 | 0.443206000  | 0.785271000  | -0.956746000 |
| 6 | 1.658849000  | 1.417251000  | 0.765353000  |
| 6 | 0.564748000  | 2.222589000  | 0.707240000  |
| 7 | -0.183213000 | 1.810235000  | -0.372300000 |
| 1 | 0.042649000  | 0.181902000  | -1.762924000 |
| 1 | 0.248476000  | 3.034798000  | 1.339415000  |
| 1 | 2.478952000  | 1.393715000  | 1.461662000  |
| 6 | -1.487408000 | 2.322784000  | -0.780610000 |
| 1 | -2.126799000 | 1.465568000  | -1.012644000 |
| 1 | -1.911788000 | 2.881950000  | 0.051411000  |
| 1 | -1.381212000 | 2.981684000  | -1.643574000 |
| 6 | 2.476368000  | -0.590900000 | -0.581118000 |
| 1 | 1.955478000  | -1.199621000 | -1.322794000 |

|   |              |              |              |
|---|--------------|--------------|--------------|
| 1 | 3.380315000  | -0.166352000 | -1.030210000 |
| 6 | 2.771711000  | -1.416212000 | 0.649450000  |
| 1 | 1.837826000  | -1.799322000 | 1.067868000  |
| 1 | 3.312216000  | -0.845853000 | 1.409929000  |
| 1 | 3.401251000  | -2.261090000 | 0.365830000  |
| 6 | -2.190362000 | -0.344918000 | 1.849576000  |
| 1 | -2.911356000 | 0.433966000  | 1.589516000  |
| 1 | -2.720498000 | -1.090174000 | 2.450034000  |
| 1 | -1.416960000 | 0.087330000  | 2.491387000  |

(b)E (RM06L) = -641.808602535

|   |              |              |              |
|---|--------------|--------------|--------------|
| 7 | -0.706058000 | -1.899292000 | 0.002682000  |
| 7 | -1.804123000 | -1.535528000 | -0.685054000 |
| 7 | -0.588545000 | -1.146078000 | 1.086308000  |
| 7 | -1.612641000 | -0.273151000 | 1.140628000  |
| 6 | -2.340666000 | -0.545610000 | 0.046573000  |
| 7 | 1.770111000  | 0.148714000  | -0.497907000 |
| 6 | 0.537653000  | 0.597245000  | -0.732084000 |
| 6 | 2.442438000  | 1.086225000  | 0.253615000  |
| 6 | 1.589771000  | 2.123778000  | 0.456775000  |
| 7 | 0.410131000  | 1.805088000  | -0.180525000 |
| 1 | -0.246234000 | 0.051821000  | -1.244979000 |
| 1 | 1.713875000  | 3.050817000  | 0.989941000  |
| 1 | 3.458526000  | 0.936588000  | 0.576110000  |
| 6 | -0.843795000 | 2.538937000  | -0.083883000 |
| 1 | -1.471294000 | 2.279663000  | -0.935192000 |
| 1 | -1.357744000 | 2.238703000  | 0.831852000  |
| 1 | -0.635083000 | 3.608301000  | -0.094319000 |
| 6 | 2.243683000  | -1.209932000 | -0.820058000 |
| 1 | 1.418711000  | -1.696938000 | -1.342437000 |
| 1 | 3.095904000  | -1.109286000 | -1.499487000 |
| 6 | 2.585092000  | -1.976870000 | 0.437736000  |
| 1 | 1.710496000  | -2.022897000 | 1.089330000  |
| 1 | 3.419547000  | -1.523239000 | 0.979623000  |
| 1 | 2.875123000  | -2.994168000 | 0.170540000  |
| 6 | -3.612932000 | 0.141427000  | -0.296913000 |
| 1 | -3.687582000 | 0.333294000  | -1.370767000 |
| 1 | -4.478922000 | -0.469578000 | -0.025670000 |
| 1 | -3.704899000 | 1.087438000  | 0.241969000  |

(c)E (RM06L) = -641.809776512

|   |              |              |              |
|---|--------------|--------------|--------------|
| 7 | 0.941429000  | 0.532369000  | 1.318217000  |
| 7 | 1.726897000  | 1.130824000  | 0.403167000  |
| 7 | 1.187807000  | -0.769316000 | 1.330752000  |
| 7 | 2.138051000  | -1.057384000 | 0.423244000  |
| 6 | 2.456497000  | 0.130159000  | -0.118402000 |
| 7 | -1.566984000 | 0.576826000  | -0.559780000 |
| 6 | -0.699458000 | -0.426548000 | -0.681250000 |
| 6 | -2.748809000 | 0.074211000  | -0.060156000 |
| 6 | -2.576942000 | -1.264168000 | 0.099874000  |
| 7 | -1.295267000 | -1.559895000 | -0.309831000 |
| 1 | 0.327740000  | -0.338173000 | -1.010535000 |
| 1 | -3.245636000 | -2.025706000 | 0.462926000  |
| 1 | -3.600187000 | 0.703873000  | 0.133373000  |
| 6 | -0.598457000 | -2.827398000 | -0.124746000 |
| 1 | -0.115453000 | -2.815676000 | 0.854577000  |
| 1 | -1.315447000 | -3.642109000 | -0.216663000 |
| 1 | 0.177923000  | -2.922439000 | -0.881188000 |
| 6 | -1.226666000 | 1.997618000  | -0.747974000 |
| 1 | -0.189472000 | 2.011985000  | -1.088872000 |
| 1 | -1.870505000 | 2.390215000  | -1.541386000 |
| 6 | -1.356427000 | 2.768795000  | 0.546266000  |
| 1 | -0.705586000 | 2.324755000  | 1.302260000  |
| 1 | -2.386877000 | 2.782325000  | 0.911871000  |
| 1 | -1.047261000 | 3.802309000  | 0.381630000  |
| 6 | 3.520400000  | 0.320427000  | -1.137732000 |
| 1 | 3.304927000  | 1.179333000  | -1.776566000 |
| 1 | 4.490173000  | 0.505675000  | -0.665726000 |
| 1 | 3.631299000  | -0.568916000 | -1.761366000 |

(d) E(RM06L) = -641.809776540

|   |              |              |              |
|---|--------------|--------------|--------------|
| 7 | 1.188122000  | -0.769282000 | 1.330726000  |
| 7 | 2.138325000  | -1.057282000 | 0.423212000  |
| 7 | 0.941671000  | 0.532429000  | 1.318180000  |
| 7 | 1.727004000  | 1.130895000  | 0.403065000  |
| 6 | 2.456635000  | 0.130278000  | -0.118539000 |
| 7 | -1.567248000 | 0.576796000  | -0.559747000 |
| 6 | -0.699534000 | -0.426451000 | -0.680980000 |
| 6 | -2.749096000 | 0.074046000  | -0.060327000 |
| 6 | -2.577092000 | -1.264318000 | 0.099725000  |
| 7 | -1.295273000 | -1.559863000 | -0.309620000 |
| 1 | 0.327633000  | -0.337968000 | -1.010304000 |
| 1 | -3.245663000 | -2.025867000 | 0.462964000  |
| 1 | -3.600663000 | 0.703542000  | 0.132941000  |
| 6 | -0.598396000 | -2.827341000 | -0.124661000 |
| 1 | 0.177617000  | -2.922506000 | -0.881463000 |
| 1 | -0.115006000 | -2.815547000 | 0.854449000  |
| 1 | -1.315417000 | -3.642064000 | -0.216262000 |
| 6 | -1.227059000 | 1.997626000  | -0.747938000 |
| 1 | -0.189980000 | 2.012071000  | -1.089194000 |
| 1 | -1.871180000 | 2.390258000  | -1.541104000 |
| 6 | -1.356473000 | 2.768685000  | 0.546426000  |
| 1 | -0.705597000 | 2.324442000  | 1.302274000  |
| 1 | -2.386861000 | 2.782261000  | 0.912208000  |
| 1 | -1.047193000 | 3.802177000  | 0.381903000  |
| 6 | 3.520551000  | 0.320402000  | -1.137880000 |
| 1 | 3.631237000  | -0.568971000 | -1.761501000 |
| 1 | 3.305285000  | 1.179350000  | -1.776724000 |
| 1 | 4.490364000  | 0.505417000  | -0.665873000 |

[4] 1-ethyl-3-methylimidazolium dicynamide ([EMIm]<sup>+</sup>[dc]<sup>-</sup>)

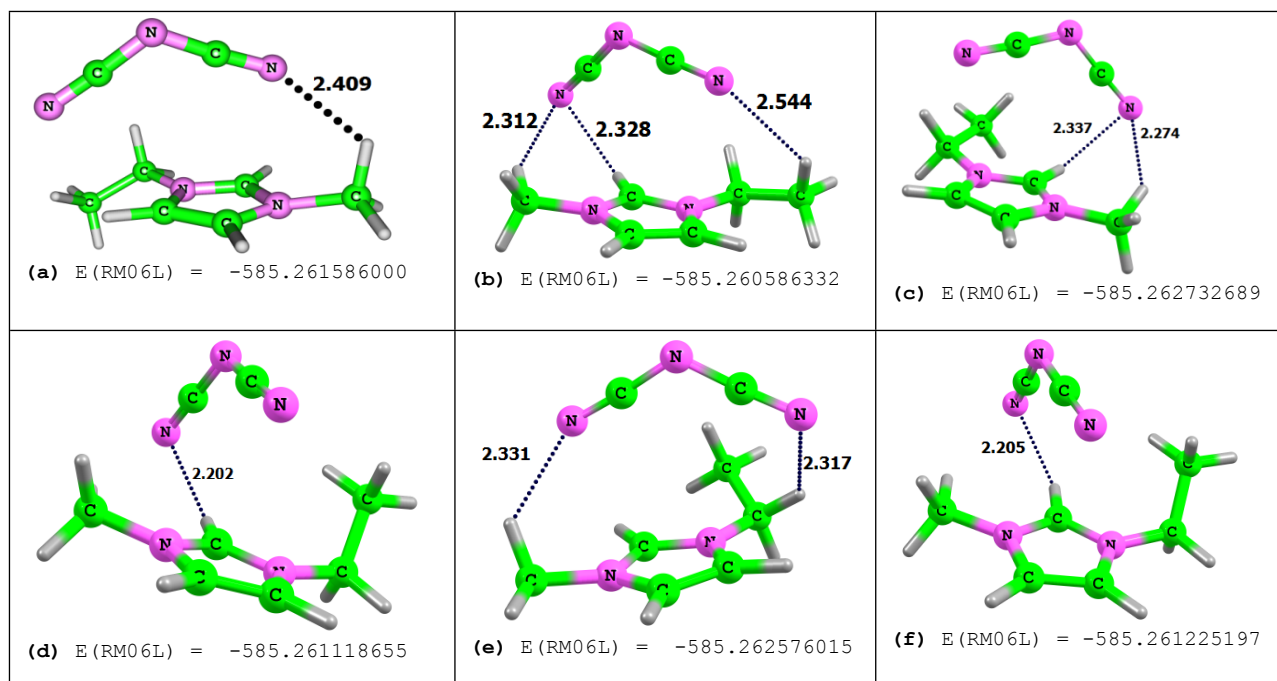

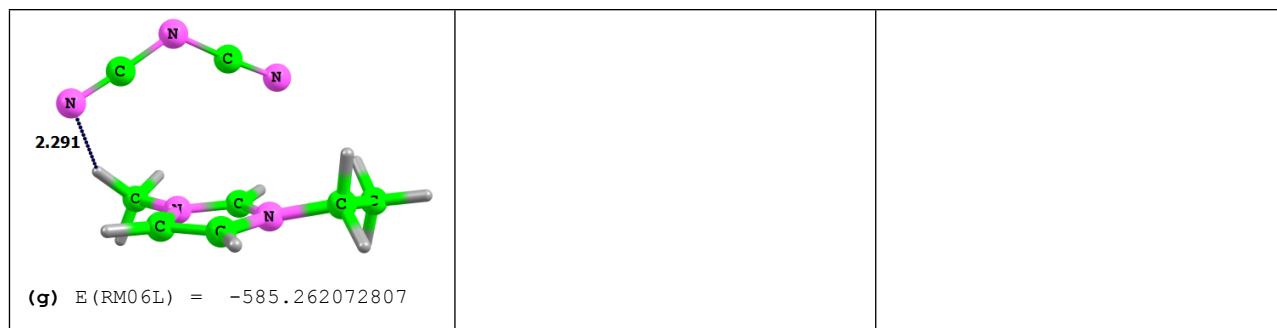

Fig. S6. Optimized conformers of 1-ethyl-3-methylimidazolium dicyanamide. All distance parameters in Å and energy in au.

Table S3. Relative energy of the a-g conformations.

| Conformation | Rel. Energy (kJ/mol) |
|--------------|----------------------|
| a            | 3.0078               |
| b            | 5.6299               |
| c            | 0.0000               |
| d            | 4.2336               |
| e            | 0.4110               |
| f            | 3.9541               |
| g            | 1.7309               |

X, Y, Z Cartesian coordinates of conformers (coordinates in Å and energy in au.)

|    |                           |              |              |
|----|---------------------------|--------------|--------------|
| a) | E(RM06L) = -585.261586000 |              |              |
| 7  | -0.169084000              | -1.092132000 | -0.229660000 |
| 6  | 1.068019000               | -1.000840000 | -0.717579000 |
| 6  | -0.127319000              | -0.824232000 | 1.121543000  |
| 6  | 1.174539000               | -0.592578000 | 1.436365000  |
| 7  | 1.908731000               | -0.730021000 | 0.279614000  |
| 1  | 1.340240000               | -1.085435000 | -1.755755000 |
| 1  | 1.639285000               | -0.336944000 | 2.373113000  |
| 1  | -1.023250000              | -0.782184000 | 1.716266000  |
| 6  | -1.379709000              | -1.292269000 | -1.047177000 |
| 1  | -1.733300000              | -0.300328000 | -1.341382000 |
| 1  | -1.055405000              | -1.823753000 | -1.945357000 |
| 6  | -2.456304000              | -2.038722000 | -0.299170000 |
| 1  | -2.839708000              | -1.430485000 | 0.521936000  |
| 1  | -2.097839000              | -2.999102000 | 0.079372000  |
| 6  | 3.291177000               | -0.316276000 | 0.095163000  |
| 1  | 3.827971000               | -0.443198000 | 1.033508000  |
| 1  | 3.757515000               | -0.933706000 | -0.671449000 |
| 1  | 3.284571000               | 0.729873000  | -0.220592000 |
| 7  | -0.818200000              | 2.562411000  | -0.035813000 |
| 6  | -1.721679000              | 1.745850000  | 0.422359000  |
| 7  | -2.569120000              | 1.048798000  | 0.851291000  |
| 6  | 0.271635000               | 2.105741000  | -0.572187000 |
| 7  | 1.286137000               | 1.770273000  | -1.072765000 |
| 1  | -3.291487000              | -2.230089000 | -0.974230000 |
| b) | E(RM06L) = -585.260586332 |              |              |
| 7  | 1.179183000               | 0.571075000  | 0.489595000  |
| 6  | -0.094885000              | 0.784012000  | 0.825600000  |
| 6  | 1.445721000               | 1.253841000  | -0.672876000 |
| 6  | 0.306883000               | 1.904979000  | -1.025712000 |
| 7  | -0.644688000              | 1.594846000  | -0.080911000 |
| 1  | -0.639094000              | 0.321468000  | 1.636937000  |
| 1  | 0.083998000               | 2.531753000  | -1.871752000 |
| 1  | 2.395511000               | 1.185221000  | -1.171837000 |
| 6  | 2.052195000               | -0.410586000 | 1.165350000  |

|   |              |              |              |
|---|--------------|--------------|--------------|
| 1 | 2.305431000  | -0.003619000 | 2.149097000  |
| 1 | 1.442996000  | -1.306429000 | 1.305545000  |
| 6 | 3.279028000  | -0.736256000 | 0.353488000  |
| 1 | 3.930017000  | 0.131899000  | 0.221015000  |
| 1 | 2.987488000  | -1.141676000 | -0.617615000 |
| 6 | -2.037889000 | 2.027203000  | -0.080765000 |
| 1 | -2.439809000 | 1.907000000  | -1.086470000 |
| 1 | -2.594438000 | 1.381473000  | 0.600496000  |
| 1 | -2.104544000 | 3.073394000  | 0.220940000  |
| 7 | -1.753425000 | -1.969759000 | -0.672238000 |
| 6 | -0.499052000 | -1.824713000 | -0.998741000 |
| 7 | 0.620496000  | -1.721579000 | -1.349323000 |
| 6 | -2.200836000 | -1.368206000 | 0.388481000  |
| 7 | -2.648880000 | -0.812394000 | 1.327953000  |
| 1 | 3.856656000  | -1.497457000 | 0.879160000  |

c) E(RM06L) = -585.262732689

|   |              |              |              |
|---|--------------|--------------|--------------|
| 7 | 0.060099000  | -1.431714000 | -0.249715000 |
| 6 | 0.696670000  | -0.388524000 | -0.783630000 |
| 6 | 0.776629000  | -1.875824000 | 0.836409000  |
| 6 | 1.879960000  | -1.091834000 | 0.937665000  |
| 7 | 1.809828000  | -0.164654000 | -0.079076000 |
| 1 | 0.354669000  | 0.238448000  | -1.592229000 |
| 1 | 2.684974000  | -1.088855000 | 1.652333000  |
| 1 | 0.410765000  | -2.667406000 | 1.466829000  |
| 6 | -1.283823000 | -1.916799000 | -0.608910000 |
| 1 | -1.176119000 | -2.951863000 | -0.947949000 |
| 1 | -1.849543000 | -1.899988000 | 0.326374000  |
| 6 | -1.948098000 | -1.048210000 | -1.646021000 |
| 1 | -1.407929000 | -1.041266000 | -2.596268000 |
| 1 | -2.052476000 | -0.019557000 | -1.291406000 |
| 6 | 2.753417000  | 0.913289000  | -0.352721000 |
| 1 | 3.556151000  | 0.557399000  | -1.000736000 |
| 1 | 2.201034000  | 1.730330000  | -0.822964000 |
| 1 | 3.172822000  | 1.257226000  | 0.591289000  |
| 7 | -1.429144000 | 2.106306000  | 0.798255000  |
| 6 | -1.489535000 | 0.931493000  | 1.361759000  |
| 7 | -1.599288000 | -0.106501000 | 1.907131000  |
| 6 | -0.624635000 | 2.295671000  | -0.201910000 |
| 7 | 0.085924000  | 2.511139000  | -1.119448000 |
| 1 | -2.949801000 | -1.432075000 | -1.841148000 |

d) E(RM06L) = -585.261118655

|   |              |              |              |
|---|--------------|--------------|--------------|
| 7 | -1.575428000 | 0.022099000  | -0.462845000 |
| 6 | -0.398316000 | 0.476221000  | -0.898965000 |
| 6 | -2.073307000 | 0.906656000  | 0.464675000  |
| 6 | -1.177270000 | 1.920936000  | 0.571063000  |
| 7 | -0.142893000 | 1.634466000  | -0.288263000 |
| 1 | 0.285400000  | -0.018287000 | -1.580326000 |
| 1 | -1.165810000 | 2.790197000  | 1.204795000  |
| 1 | -2.996282000 | 0.721413000  | 0.986259000  |
| 6 | -2.126944000 | -1.300631000 | -0.791945000 |
| 1 | -3.152874000 | -1.304743000 | -0.418207000 |
| 1 | -2.179102000 | -1.375004000 | -1.881380000 |
| 6 | -1.297166000 | -2.411864000 | -0.185502000 |
| 1 | -1.213115000 | -2.290859000 | 0.895777000  |
| 1 | -0.284680000 | -2.418140000 | -0.597401000 |
| 6 | 1.107125000  | 2.374639000  | -0.407869000 |
| 1 | 1.578545000  | 2.423711000  | 0.574909000  |
| 1 | 1.764427000  | 1.834075000  | -1.089240000 |
| 1 | 0.910922000  | 3.381053000  | -0.778734000 |
| 7 | 2.245557000  | -1.148929000 | 0.809000000  |
| 6 | 1.209292000  | -0.733872000 | 1.486638000  |
| 7 | 0.292022000  | -0.393889000 | 2.142793000  |
| 6 | 2.335325000  | -0.814674000 | -0.443440000 |
| 7 | 2.428895000  | -0.523896000 | -1.583255000 |
| 1 | -1.756955000 | -3.376849000 | -0.406383000 |

e) E(RM06L) = -585.262576015

|   |              |              |              |
|---|--------------|--------------|--------------|
| 7 | 0.009508000  | -1.287949000 | -0.039028000 |
| 6 | 1.001954000  | -0.755102000 | 0.675839000  |
| 6 | 0.318931000  | -1.171124000 | -1.376163000 |
| 6 | 1.534591000  | -0.570053000 | -1.450905000 |
| 7 | 1.951332000  | -0.329744000 | -0.159267000 |
| 1 | 1.019459000  | -0.632368000 | 1.744336000  |
| 1 | 2.126973000  | -0.273808000 | -2.299138000 |
| 1 | -0.377690000 | -1.474520000 | -2.138614000 |
| 6 | -1.240262000 | -1.867024000 | 0.487295000  |
| 1 | -1.985389000 | -1.685948000 | -0.290546000 |
| 1 | -1.087121000 | -2.945530000 | 0.596441000  |
| 6 | -1.663431000 | -1.219278000 | 1.783417000  |
| 1 | -1.766595000 | -0.138556000 | 1.664226000  |
| 1 | -0.965893000 | -1.414978000 | 2.602060000  |
| 6 | 3.100695000  | 0.469484000  | 0.244796000  |
| 1 | 2.726578000  | 1.415554000  | 0.643582000  |
| 1 | 3.672879000  | -0.061783000 | 1.005235000  |
| 1 | 3.731039000  | 0.635872000  | -0.626056000 |
| 7 | -1.414167000 | 2.175584000  | -0.258298000 |
| 6 | -1.904237000 | 1.147865000  | -0.889177000 |
| 7 | -2.391172000 | 0.257029000  | -1.486094000 |
| 6 | -0.381524000 | 2.046742000  | 0.515745000  |
| 7 | 0.550037000  | 2.000233000  | 1.238642000  |
| 1 | -2.633302000 | -1.619078000 | 2.081715000  |

f) E(RM06L) = -585.261225197

|   |              |              |              |
|---|--------------|--------------|--------------|
| 7 | -1.593331000 | 0.048548000  | -0.414281000 |
| 6 | -0.415436000 | 0.445975000  | -0.899592000 |
| 6 | -2.032680000 | 0.980300000  | 0.496112000  |
| 6 | -1.098927000 | 1.964384000  | 0.543727000  |
| 7 | -0.100827000 | 1.613158000  | -0.334032000 |
| 1 | 0.230795000  | -0.093287000 | -1.582549000 |
| 1 | -1.038161000 | 2.851162000  | 1.150015000  |
| 1 | -2.943607000 | 0.842869000  | 1.052351000  |
| 6 | -2.205930000 | -1.258821000 | -0.697039000 |
| 1 | -3.157871000 | -1.269002000 | -0.163086000 |
| 1 | -2.432991000 | -1.297404000 | -1.766317000 |
| 6 | -1.305190000 | -2.396002000 | -0.265150000 |
| 1 | -1.067228000 | -2.318249000 | 0.797115000  |
| 1 | -0.363811000 | -2.391123000 | -0.821078000 |
| 6 | 1.168534000  | 2.307118000  | -0.513705000 |
| 1 | 1.667856000  | 2.376928000  | 0.453917000  |
| 1 | 1.790237000  | 1.719899000  | -1.189771000 |
| 1 | 0.994099000  | 3.304931000  | -0.917035000 |
| 7 | 2.284075000  | -1.032643000 | 0.867567000  |
| 6 | 1.201776000  | -0.703607000 | 1.519865000  |
| 7 | 0.252176000  | -0.423711000 | 2.158122000  |
| 6 | 2.309906000  | -0.850156000 | -0.418365000 |
| 7 | 2.356326000  | -0.678516000 | -1.585017000 |
| 1 | -1.800579000 | -3.349718000 | -0.455186000 |

g) E(RM06L) = -585.262072807

|   |              |              |              |
|---|--------------|--------------|--------------|
| 7 | -1.380898000 | -0.590982000 | -0.472743000 |
| 6 | -0.768543000 | -0.735610000 | 0.700882000  |
| 6 | -0.558715000 | -1.102455000 | -1.456550000 |
| 6 | 0.557884000  | -1.575936000 | -0.847217000 |
| 7 | 0.400923000  | -1.347225000 | 0.503335000  |
| 1 | -1.130851000 | -0.375493000 | 1.646951000  |
| 1 | 1.467680000  | -1.995490000 | -1.240887000 |
| 1 | -0.833251000 | -1.062655000 | -2.496590000 |
| 6 | -2.579707000 | 0.226334000  | -0.716306000 |
| 1 | -2.222175000 | 1.179238000  | -1.116851000 |
| 1 | -3.157787000 | -0.290755000 | -1.487176000 |
| 6 | -3.383837000 | 0.461434000  | 0.536874000  |
| 1 | -2.817860000 | 1.075458000  | 1.240051000  |
| 1 | -3.684629000 | -0.475324000 | 1.013964000  |
| 6 | 1.390137000  | -1.650425000 | 1.530105000  |



|   |              |              |              |
|---|--------------|--------------|--------------|
| 1 | 2.368777000  | -1.356806000 | 1.144182000  |
| 1 | 1.160478000  | -1.066534000 | 2.419902000  |
| 1 | 1.368830000  | -2.714436000 | 1.770607000  |
| 7 | 1.835808000  | 2.024595000  | -0.252656000 |
| 6 | 2.511518000  | 0.923039000  | -0.398669000 |
| 7 | 3.165370000  | -0.043983000 | -0.556255000 |
| 6 | 0.637265000  | 2.007626000  | 0.241715000  |
| 7 | -0.458971000 | 2.064519000  | 0.675373000  |
| 1 | -4.290857000 | 1.010285000  | 0.281468000  |

[5] 1-ethyl-3-methylimidazolium 1,2,4-triazolate ([EMIm]<sup>+</sup>[trz]<sup>-</sup>)

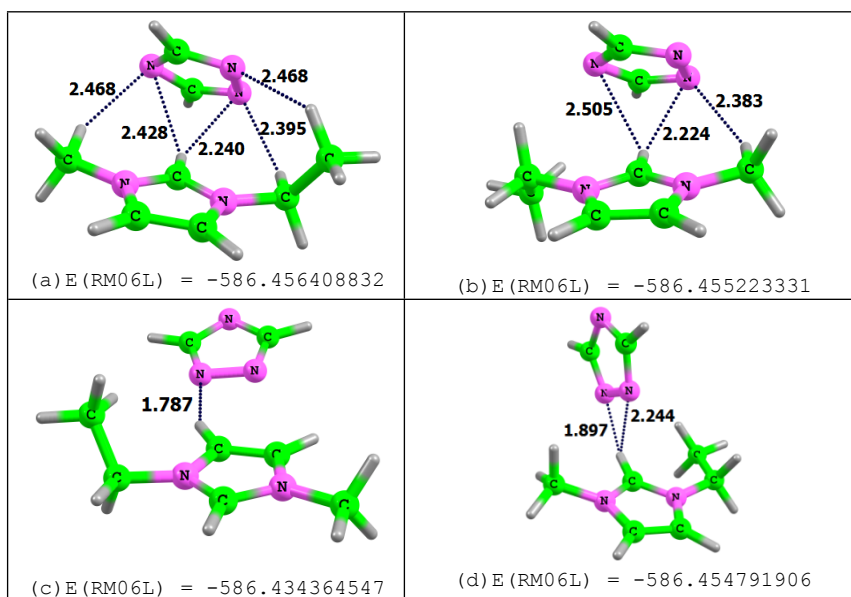

Fig. S7. Optimized conformers of 1-ethyl-3-methylimidazolium 1,2,4-triazolate. All distance parameters in Å and energy in au.

Table S4. Relative energy of the a-d conformations

| Conformation | Rel. Energy (kJ/mol) |
|--------------|----------------------|
| a            | 0.0000               |
| b            | 3.1096               |
| c            | 57.8220              |
| d            | 4.2412               |

X, Y, Z Cartesian coordinates of conformers (coordinates in Å and energy in au.)

|    |              |                |              |
|----|--------------|----------------|--------------|
| a) | E (RM06L) =  | -586.456408832 |              |
| 6  | 2.622351000  | -0.303155000   | -0.781490000 |
| 7  | 2.640952000  | 0.706196000    | 0.118058000  |
| 7  | 1.914733000  | -1.377283000   | -0.404553000 |
| 7  | 1.434677000  | -1.071297000   | 0.841084000  |
| 6  | 1.897852000  | 0.157644000    | 1.101762000  |
| 1  | 1.691004000  | 0.664701000    | 2.039736000  |
| 7  | -0.840599000 | 1.686132000    | -0.144493000 |
| 6  | -0.425335000 | 0.494801000    | -0.583426000 |
| 6  | -2.131382000 | 1.557132000    | 0.326974000  |
| 6  | -2.489339000 | 0.258730000    | 0.148174000  |
| 7  | -1.415825000 | -0.383252000   | -0.431428000 |
| 1  | 0.541862000  | 0.280146000    | -1.026305000 |
| 6  | 0.004739000  | 2.871797000    | -0.086968000 |
| 1  | -0.287539000 | 3.585452000    | -0.858920000 |

|   |              |              |              |
|---|--------------|--------------|--------------|
| 1 | -0.096809000 | 3.334161000  | 0.894680000  |
| 1 | 1.041664000  | 2.554723000  | -0.222487000 |
| 6 | -1.290112000 | -1.827415000 | -0.704731000 |
| 1 | -2.045393000 | -2.082762000 | -1.454621000 |
| 1 | -0.291653000 | -1.959673000 | -1.130882000 |
| 6 | -1.425697000 | -2.642032000 | 0.562004000  |
| 1 | -2.400534000 | -2.506831000 | 1.039569000  |
| 1 | -0.625569000 | -2.366008000 | 1.252530000  |
| 1 | -1.319289000 | -3.700705000 | 0.318985000  |
| 1 | 3.149092000  | -0.261614000 | -1.728804000 |
| 1 | -2.670173000 | 2.389655000  | 0.746675000  |
| 1 | -3.402687000 | -0.259730000 | 0.385372000  |

b) E(RM06L) = -586.455223331

|   |              |              |              |
|---|--------------|--------------|--------------|
| 6 | 2.514176000  | 0.315654000  | -0.576206000 |
| 7 | 2.136683000  | 1.044424000  | 0.497135000  |
| 7 | 2.290285000  | -1.002278000 | -0.467679000 |
| 7 | 1.736142000  | -1.171108000 | 0.772542000  |
| 6 | 1.674099000  | 0.059515000  | 1.296525000  |
| 1 | 1.290640000  | 0.240115000  | 2.296764000  |
| 7 | -1.157008000 | -1.377658000 | -0.333440000 |
| 6 | -0.586970000 | -0.178433000 | -0.454602000 |
| 6 | -2.343529000 | -1.236302000 | 0.351864000  |
| 6 | -2.488023000 | 0.086645000  | 0.628227000  |
| 7 | -1.389047000 | 0.732802000  | 0.102057000  |
| 1 | 0.365534000  | 0.007708000  | -0.940083000 |
| 6 | -0.516192000 | -2.627072000 | -0.731132000 |
| 1 | -1.138890000 | -3.142148000 | -1.464391000 |
| 1 | 0.470075000  | -2.389054000 | -1.132700000 |
| 1 | -0.371272000 | -3.245587000 | 0.153862000  |
| 6 | -1.031471000 | 2.149487000  | 0.285978000  |
| 1 | -1.943145000 | 2.651456000  | 0.618246000  |
| 1 | -0.290648000 | 2.192405000  | 1.090864000  |
| 6 | -0.469756000 | 2.764766000  | -0.973614000 |
| 1 | -1.165208000 | 2.678993000  | -1.812047000 |
| 1 | 0.483538000  | 2.300747000  | -1.234766000 |
| 1 | -0.271235000 | 3.823132000  | -0.799536000 |
| 1 | 2.978583000  | 0.751544000  | -1.454951000 |
| 1 | -2.973010000 | -2.079415000 | 0.579834000  |
| 1 | -3.268344000 | 0.621262000  | 1.142353000  |

c) E(RM06L) = -586.434364547

|   |              |              |              |
|---|--------------|--------------|--------------|
| 6 | 3.293081000  | -1.412989000 | 0.195232000  |
| 7 | 4.246095000  | -0.460880000 | 0.159329000  |
| 7 | 2.051827000  | -0.982533000 | -0.027580000 |
| 7 | 2.188997000  | 0.373443000  | -0.229906000 |
| 6 | 3.495927000  | 0.619610000  | -0.108940000 |
| 1 | 3.907093000  | 1.616836000  | -0.221838000 |
| 7 | -2.383115000 | -1.198066000 | 0.015355000  |
| 6 | -2.783652000 | 0.080222000  | 0.015234000  |
| 6 | -1.023443000 | -1.233369000 | -0.225246000 |
| 6 | -0.601424000 | 0.049838000  | -0.382443000 |
| 7 | -1.714687000 | 0.845791000  | -0.226080000 |
| 1 | -3.790657000 | 0.423459000  | 0.186777000  |
| 6 | -3.230744000 | -2.350477000 | 0.266456000  |
| 1 | -3.198383000 | -3.028213000 | -0.586867000 |
| 1 | -2.884279000 | -2.878532000 | 1.155347000  |
| 1 | -4.256372000 | -2.021255000 | 0.422929000  |
| 6 | -1.684616000 | 2.313505000  | -0.291961000 |
| 1 | -1.519674000 | 2.590284000  | -1.337384000 |
| 1 | -2.679972000 | 2.668390000  | -0.012120000 |
| 6 | -0.601377000 | 2.876667000  | 0.602300000  |
| 1 | 0.381836000  | 2.478138000  | 0.336314000  |
| 1 | -0.790509000 | 2.634845000  | 1.650115000  |
| 1 | -0.571040000 | 3.962540000  | 0.501778000  |
| 1 | 3.511626000  | -2.457236000 | 0.390850000  |
| 1 | -0.441726000 | -2.139977000 | -0.236963000 |
| 1 | 0.425720000  | 0.448398000  | -0.510555000 |

d) E(RM06L) = -586.454791906

|   |              |              |              |
|---|--------------|--------------|--------------|
| 6 | -2.486277000 | -0.101457000 | 1.297732000  |
| 7 | -3.618937000 | -0.014769000 | 0.578148000  |
| 7 | -1.362251000 | -0.006632000 | 0.583617000  |
| 7 | -1.782060000 | 0.155005000  | -0.718319000 |
| 6 | -3.114860000 | 0.143694000  | -0.657793000 |
| 1 | -3.732384000 | 0.255618000  | -1.541684000 |
| 7 | 1.263555000  | -1.434600000 | -0.372383000 |
| 6 | 0.952085000  | -0.150820000 | -0.575565000 |
| 6 | 2.340265000  | -1.505494000 | 0.487925000  |
| 6 | 2.703683000  | -0.229810000 | 0.771438000  |
| 7 | 1.835834000  | 0.599932000  | 0.086011000  |
| 1 | 0.067763000  | 0.174759000  | -1.136687000 |
| 6 | 0.378861000  | -2.526313000 | -0.747506000 |
| 1 | 0.955328000  | -3.446119000 | -0.837235000 |
| 1 | -0.401894000 | -2.627032000 | 0.009609000  |
| 1 | -0.096389000 | -2.290568000 | -1.697679000 |
| 6 | 1.729702000  | 2.054054000  | 0.263411000  |
| 1 | 1.421545000  | 2.221952000  | 1.300454000  |
| 1 | 2.734267000  | 2.470613000  | 0.141949000  |
| 6 | 0.738662000  | 2.673389000  | -0.690880000 |
| 1 | -0.260896000 | 2.253969000  | -0.548651000 |
| 1 | 1.034526000  | 2.522606000  | -1.732163000 |
| 1 | 0.689333000  | 3.747772000  | -0.509994000 |
| 1 | -2.474349000 | -0.232945000 | 2.373834000  |
| 1 | 2.756571000  | -2.446765000 | 0.804710000  |
| 1 | 3.500874000  | 0.160130000  | 1.381438000  |

[6] 1-ethyl-3-methylimidazolium 3,5-dinitro 1,2,4-triazolate ([EMIm]<sup>+</sup>[dtrz]<sup>-</sup>)

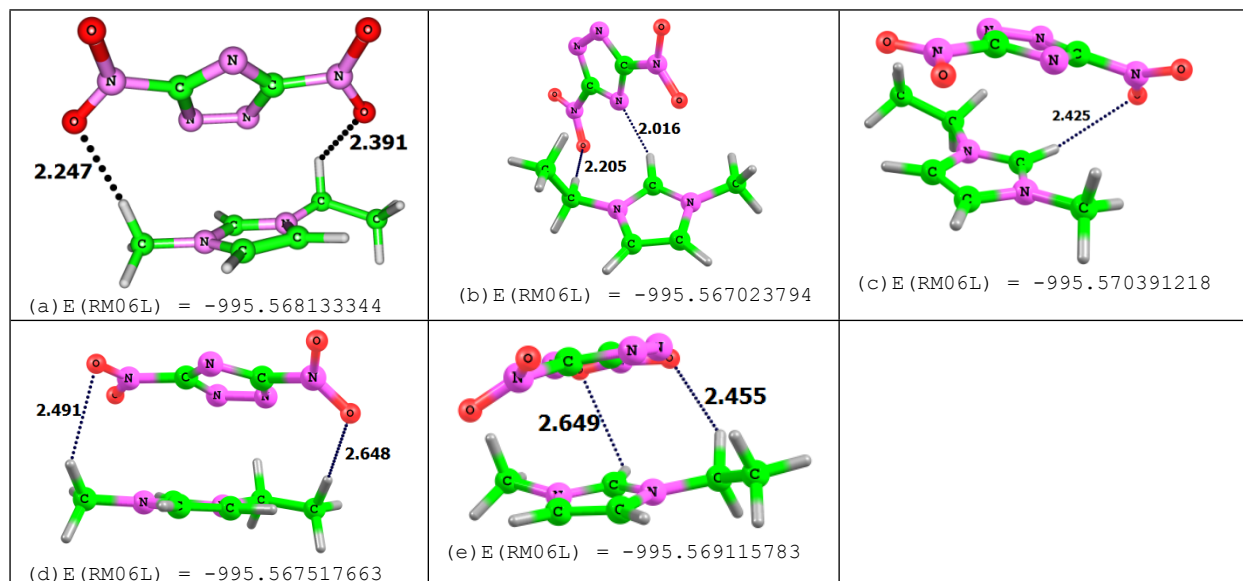

Fig. S8. Optimized conformers of 1-ethyl-3-methylimidazolium 3,5-dinitro 1,2,4-triazolate. All distance parameters in Å and energy in au.

Table S5. Relative energy of the a-e conformations

| Conformation | Rel. Energy (kJ/mol) |
|--------------|----------------------|
| a            | 5.9224               |
| b            | 8.8327               |
| c            | 0.0000               |
| d            | 7.5373               |
| e            | 3.3455               |

**X, Y, Z Cartesian coordinates of conformers (coordinates in Å and energy in au.)**

a) E(RM06L) = -995.568133344

|   |              |               |              |
|---|--------------|---------------|--------------|
| 6 | -2.029898000 | 0.501371000   | -0.304719000 |
| 7 | -1.588532000 | 1.648557000   | 0.207226000  |
| 7 | -1.154922000 | -0.213963000  | -1.033732000 |
| 7 | -0.025138000 | 0.508623000   | -0.995905000 |
| 6 | -0.339089000 | 1.580294000   | -0.247019000 |
| 7 | 0.325115000  | -2.336513000  | 0.342622000  |
| 6 | 1.246238000  | -2.038825000  | -0.572245000 |
| 6 | 0.585594000  | -1.596317000  | 1.471568000  |
| 6 | 1.702858000  | -0.860470000  | 1.220270000  |
| 7 | 2.112667000  | -1.168346000  | -0.054297000 |
| 1 | 1.256351000  | -2.403215000  | -1.585595000 |
| 6 | -0.862977000 | -3.1511335000 | 0.113151000  |
| 1 | -0.670686000 | -3.829747000  | -0.715926000 |
| 1 | -1.074585000 | -3.731768000  | 1.010271000  |
| 1 | -1.703334000 | -2.496890000  | -0.136461000 |
| 6 | 3.130249000  | -0.455949000  | -0.846711000 |
| 1 | 3.483415000  | -1.164837000  | -1.599998000 |
| 1 | 2.595314000  | 0.357556000   | -1.345495000 |
| 6 | 4.261115000  | 0.065441000   | 0.003085000  |
| 1 | 4.746180000  | -0.727926000  | 0.577106000  |
| 1 | 3.919401000  | 0.847949000   | 0.682336000  |
| 1 | 5.012394000  | 0.518240000   | -0.644999000 |
| 1 | -0.041198000 | -1.656589000  | 2.345145000  |
| 1 | 2.230503000  | -0.148373000  | 1.830585000  |
| 7 | -3.366234000 | -0.004993000  | -0.048613000 |
| 8 | -3.543978000 | -1.211954000  | -0.233870000 |
| 8 | -4.214058000 | 0.777751000   | 0.342415000  |
| 7 | 0.672245000  | 2.554653000   | 0.107169000  |
| 8 | 1.850975000  | 2.194952000   | -0.008417000 |
| 8 | 0.313974000  | 3.646026000   | 0.510805000  |

b) E(RM06L) = -995.567023794

|   |              |              |              |
|---|--------------|--------------|--------------|
| 6 | -1.340907000 | 1.500011000  | 0.166125000  |
| 7 | -1.103038000 | 0.318235000  | -0.411099000 |
| 7 | -2.599125000 | 1.716350000  | 0.582120000  |
| 7 | -3.259815000 | 0.599691000  | 0.254358000  |
| 6 | -2.335073000 | -0.185556000 | -0.323273000 |
| 7 | -0.281369000 | 2.463281000  | 0.350023000  |
| 8 | -0.540144000 | 3.520109000  | 0.895843000  |
| 8 | 0.846572000  | 2.139134000  | -0.056364000 |
| 7 | -2.628721000 | -1.521447000 | -0.796793000 |
| 8 | -3.793085000 | -1.876536000 | -0.838246000 |
| 8 | -1.662224000 | -2.223059000 | -1.121079000 |
| 7 | 1.905746000  | -1.389567000 | 0.390683000  |
| 6 | 1.717019000  | -0.517549000 | -0.600199000 |
| 6 | 3.232802000  | -1.363354000 | 0.762656000  |
| 6 | 3.851620000  | -0.456966000 | -0.038169000 |
| 7 | 2.888358000  | 0.057885000  | -0.879812000 |
| 1 | 0.736105000  | -0.262341000 | -0.997169000 |
| 1 | 4.879193000  | -0.139008000 | -0.086176000 |
| 1 | 3.616486000  | -1.991951000 | 1.548618000  |
| 6 | 3.075875000  | 1.127788000  | -1.848425000 |
| 1 | 3.384863000  | 2.036388000  | -1.332222000 |
| 1 | 3.826520000  | 0.836668000  | -2.583808000 |
| 1 | 2.125674000  | 1.319297000  | -2.340527000 |
| 6 | 0.818626000  | -2.135572000 | 1.047361000  |
| 1 | 0.012376000  | -2.214851000 | 0.314029000  |
| 1 | 1.195855000  | -3.141938000 | 1.245512000  |
| 6 | 0.358314000  | -1.440445000 | 2.311001000  |
| 1 | 0.004517000  | -0.430554000 | 2.091850000  |
| 1 | 1.155406000  | -1.373885000 | 3.055736000  |
| 1 | -0.469854000 | -1.996143000 | 2.754107000  |

c) E(RM06L) = -995.570391218

|   |             |             |              |
|---|-------------|-------------|--------------|
| 6 | 1.541343000 | 0.393757000 | -0.962142000 |
| 7 | 1.047273000 | 1.382310000 | -0.219442000 |

|   |              |              |              |
|---|--------------|--------------|--------------|
| 7 | 0.705752000  | -0.180646000 | -1.846602000 |
| 7 | -0.443379000 | 0.494973000  | -1.698382000 |
| 6 | -0.191597000 | 1.383533000  | -0.722183000 |
| 7 | 0.215921000  | -0.772921000 | 1.830296000  |
| 6 | 0.056423000  | -1.553886000 | 0.757716000  |
| 6 | -1.003818000 | -0.226610000 | 2.161027000  |
| 6 | -1.911383000 | -0.708053000 | 1.269667000  |
| 7 | -1.229758000 | -1.531755000 | 0.401677000  |
| 1 | 0.853030000  | -2.052822000 | 0.221812000  |
| 6 | 1.499846000  | -0.391792000 | 2.409079000  |
| 1 | 2.259893000  | -1.102412000 | 2.087507000  |
| 1 | 1.759406000  | 0.609011000  | 2.054695000  |
| 1 | 1.425896000  | -0.406929000 | 3.495674000  |
| 6 | -1.769502000 | -2.204312000 | -0.800343000 |
| 1 | -0.975959000 | -2.144294000 | -1.549089000 |
| 1 | -1.931522000 | -3.256141000 | -0.544740000 |
| 6 | -3.028809000 | -1.539533000 | -1.297866000 |
| 1 | -2.852711000 | -0.478270000 | -1.486874000 |
| 1 | -3.863195000 | -1.657732000 | -0.601676000 |
| 1 | -3.323569000 | -2.006571000 | -2.238336000 |
| 1 | -1.110749000 | 0.477968000  | 2.968233000  |
| 1 | -2.960584000 | -0.498341000 | 1.155538000  |
| 7 | 2.847194000  | -0.171127000 | -0.676318000 |
| 8 | 2.951727000  | -1.394596000 | -0.800369000 |
| 8 | 3.727144000  | 0.572984000  | -0.274130000 |
| 7 | -1.263060000 | 2.145637000  | -0.111052000 |
| 8 | -2.394876000 | 1.984595000  | -0.560788000 |
| 8 | -0.983315000 | 2.841094000  | 0.858575000  |

d) E(RM06L) = -995.567517663

|   |              |              |              |
|---|--------------|--------------|--------------|
| 6 | 0.364365000  | -1.364699000 | -0.757928000 |
| 7 | -0.553796000 | -1.906325000 | 0.049140000  |
| 7 | -0.036019000 | -0.329210000 | -1.516798000 |
| 7 | -1.320351000 | -0.147468000 | -1.181326000 |
| 6 | -1.563575000 | -1.102660000 | -0.264505000 |
| 7 | 1.994072000  | 0.894228000  | 0.970684000  |
| 6 | 1.663101000  | 1.689248000  | -0.049557000 |
| 6 | 0.875952000  | 0.704349000  | 1.753359000  |
| 6 | -0.135014000 | 1.415242000  | 1.184132000  |
| 7 | 0.381235000  | 2.035097000  | 0.070095000  |
| 1 | 2.311537000  | 1.952981000  | -0.868394000 |
| 6 | 3.310951000  | 0.312657000  | 1.209349000  |
| 1 | 3.949832000  | 0.524396000  | 0.355762000  |
| 1 | 3.741805000  | 0.738823000  | 2.116384000  |
| 1 | 3.217728000  | -0.769089000 | 1.311059000  |
| 6 | -0.381598000 | 2.760813000  | -0.970054000 |
| 1 | 0.190552000  | 3.663021000  | -1.204027000 |
| 1 | -0.385909000 | 2.104359000  | -1.844510000 |
| 6 | -1.786745000 | 3.078958000  | -0.529342000 |
| 1 | -1.807494000 | 3.696177000  | 0.372702000  |
| 1 | -2.362242000 | 2.164365000  | -0.367193000 |
| 1 | -2.282758000 | 3.638338000  | -1.323242000 |
| 1 | 0.892967000  | 0.066302000  | 2.620533000  |
| 1 | -1.174655000 | 1.500719000  | 1.453316000  |
| 7 | 1.759844000  | -1.731292000 | -0.694155000 |
| 8 | 2.550095000  | -1.074099000 | -1.376532000 |
| 8 | 2.090276000  | -2.620526000 | 0.083217000  |
| 7 | -2.838237000 | -1.148084000 | 0.431987000  |
| 8 | -3.451675000 | -0.082947000 | 0.514226000  |
| 8 | -3.199100000 | -2.211488000 | 0.906276000  |

e) E(RM06L) = -995.569115783

|   |              |              |              |
|---|--------------|--------------|--------------|
| 6 | -1.635089000 | 0.214722000  | -0.882667000 |
| 7 | -0.844496000 | -0.848463000 | -1.002019000 |
| 7 | -1.114230000 | 1.402451000  | -1.247380000 |
| 7 | 0.128182000  | 1.109833000  | -1.654841000 |
| 6 | 0.223032000  | -0.224157000 | -1.508924000 |
| 7 | 0.536347000  | -1.311863000 | 1.666769000  |
| 6 | 1.570802000  | -0.613611000 | 1.194443000  |
| 6 | -0.424223000 | -0.429671000 | 2.100041000  |
| 6 | 0.055364000  | 0.824241000  | 1.878013000  |

|   |              |              |              |
|---|--------------|--------------|--------------|
| 7 | 1.300401000  | 0.689936000  | 1.306979000  |
| 1 | 2.456776000  | -1.033843000 | 0.744392000  |
| 6 | 0.327899000  | -2.741884000 | 1.465541000  |
| 1 | 1.284051000  | -3.214877000 | 1.251943000  |
| 1 | -0.112339000 | -3.173069000 | 2.363541000  |
| 1 | -0.336651000 | -2.863713000 | 0.607090000  |
| 6 | 2.162606000  | 1.771587000  | 0.772197000  |
| 1 | 3.060171000  | 1.811260000  | 1.396300000  |
| 1 | 2.449540000  | 1.455986000  | -0.235511000 |
| 6 | 1.447632000  | 3.097815000  | 0.726965000  |
| 1 | 1.186849000  | 3.464290000  | 1.723244000  |
| 1 | 0.549784000  | 3.038327000  | 0.107634000  |
| 1 | 2.111650000  | 3.833930000  | 0.272882000  |
| 1 | -1.379782000 | -0.767290000 | 2.464133000  |
| 1 | -0.396550000 | 1.786825000  | 2.041323000  |
| 7 | -2.929651000 | 0.126204000  | -0.232969000 |
| 8 | -3.721962000 | 1.036719000  | -0.415248000 |
| 8 | -3.120101000 | -0.848018000 | 0.496822000  |
| 7 | 1.471886000  | -0.917528000 | -1.704442000 |
| 8 | 2.459611000  | -0.247966000 | -2.003220000 |
| 8 | 1.497364000  | -2.126495000 | -1.470268000 |

[7] 1-ethyl-3-methylimidazolium dinitramine([EMIm]<sup>+</sup>[dn]<sup>-</sup>)

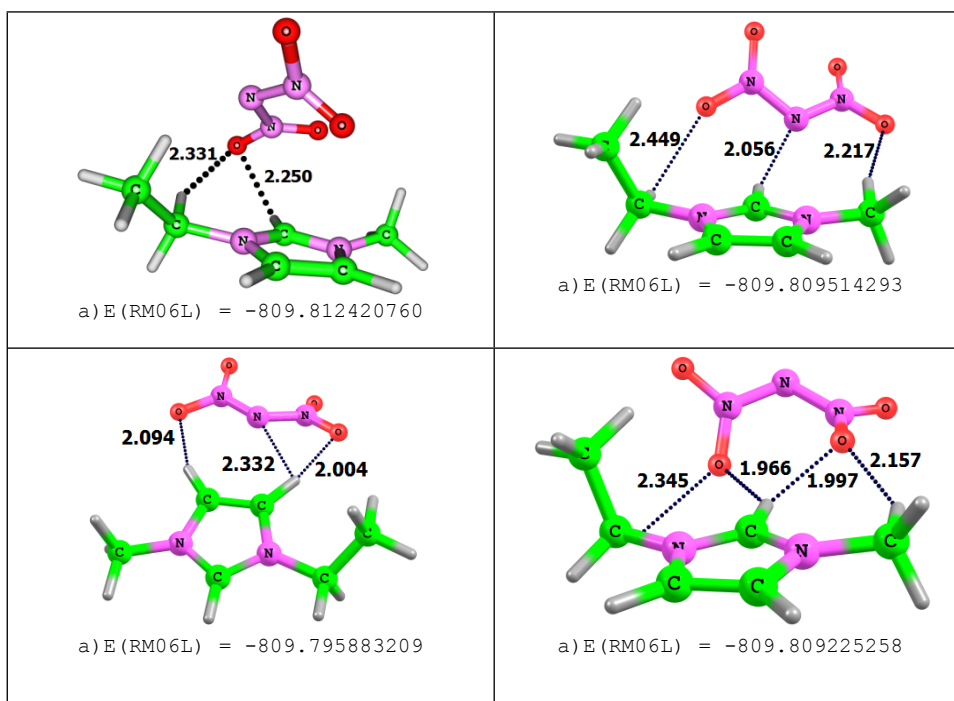

Fig. S9. Optimized conformers of 1-ethyl-3-methylimidazolium dinitramine. All distance parameters in Å and energy in a.u.

Table S6. Relative energy of the a-d conformations.

| Conformation | Rel. Energy (kJ/mol) |
|--------------|----------------------|
| a            | 0.0000               |
| b            | 7.6236               |
| c            | 43.3779              |
| d            | 8.3818               |

**X, Y, Z Cartesian coordinates of conformers (coordinates in Å and energy in au.)**

a) E(RM06L) = -809.812420760

|   |              |              |              |
|---|--------------|--------------|--------------|
| 7 | -0.919987000 | 1.301223000  | -0.404370000 |
| 6 | -1.239071000 | 0.101973000  | -0.892329000 |
| 6 | -1.583781000 | 1.475276000  | 0.789977000  |
| 6 | -2.300533000 | 0.343741000  | 1.016347000  |
| 7 | -2.078861000 | -0.497202000 | -0.047212000 |
| 1 | -2.909497000 | 0.050260000  | 1.853746000  |
| 1 | -1.472370000 | 2.365236000  | 1.383748000  |
| 6 | 0.041655000  | 2.227580000  | -1.037657000 |
| 1 | 0.648590000  | 1.605994000  | -1.702152000 |
| 1 | -0.529800000 | 2.939595000  | -1.641678000 |
| 6 | 0.907889000  | 2.925183000  | -0.016446000 |
| 1 | 1.456157000  | 2.202124000  | 0.589909000  |
| 1 | 0.336196000  | 3.590235000  | 0.635681000  |
| 6 | -2.394392000 | -1.918376000 | -0.083400000 |
| 1 | -1.619954000 | -2.451841000 | 0.470559000  |
| 1 | -3.375939000 | -2.080718000 | 0.359394000  |
| 1 | -2.393124000 | -2.261074000 | -1.115922000 |
| 1 | 1.641752000  | 3.539408000  | -0.540093000 |
| 1 | -0.838142000 | -0.325086000 | -1.799929000 |
| 7 | 1.891405000  | -0.320922000 | -0.058494000 |
| 7 | 1.451456000  | -0.606841000 | 1.244868000  |
| 8 | 0.292307000  | -0.962580000 | 1.479062000  |
| 8 | 2.265261000  | -0.311663000 | 2.108240000  |
| 7 | 1.280296000  | -1.062762000 | -1.022704000 |
| 8 | 0.710076000  | -2.138827000 | -0.815651000 |
| 8 | 1.369275000  | -0.562039000 | -2.163754000 |

b) E(RM06L) = -809.809514293

|   |              |              |              |
|---|--------------|--------------|--------------|
| 7 | 2.314106000  | -0.058144000 | -0.377015000 |
| 6 | 1.158488000  | 0.587179000  | -0.546391000 |
| 6 | 3.169327000  | 0.744825000  | 0.346791000  |
| 6 | 2.501676000  | 1.898731000  | 0.611478000  |
| 7 | 1.248606000  | 1.778123000  | 0.050346000  |
| 1 | 2.801605000  | 2.783440000  | 1.147022000  |
| 1 | 4.164362000  | 0.428116000  | 0.609933000  |
| 6 | 2.570563000  | -1.443720000 | -0.804106000 |
| 1 | 1.724272000  | -1.728723000 | -1.429266000 |
| 1 | 3.472754000  | -1.430162000 | -1.422488000 |
| 6 | 2.700067000  | -2.374643000 | 0.380314000  |
| 1 | 1.772385000  | -2.386226000 | 0.953813000  |
| 1 | 3.528852000  | -2.090609000 | 1.034008000  |
| 6 | 0.169698000  | 2.762654000  | 0.099025000  |
| 1 | 0.151633000  | 3.212923000  | 1.090754000  |
| 1 | 0.342046000  | 3.538352000  | -0.648409000 |
| 1 | -0.784871000 | 2.262018000  | -0.086148000 |
| 1 | 2.888110000  | -3.389326000 | 0.026209000  |
| 1 | 0.254696000  | 0.184918000  | -0.989005000 |
| 7 | -1.659479000 | -0.099250000 | -0.293455000 |
| 7 | -1.494158000 | -1.387841000 | 0.162057000  |
| 8 | -2.257371000 | -1.959666000 | 0.918127000  |
| 8 | -0.397771000 | -1.868700000 | -0.213814000 |
| 7 | -2.941146000 | 0.438607000  | -0.147151000 |
| 8 | -3.948777000 | -0.241225000 | -0.123650000 |
| 8 | -2.922363000 | 1.677675000  | -0.152234000 |

c) E(RM06L) = -809.795883209

|   |              |              |              |
|---|--------------|--------------|--------------|
| 7 | -2.379656000 | -0.460485000 | -0.164996000 |
| 6 | -3.001945000 | 0.720973000  | -0.215438000 |
| 6 | -1.027578000 | -0.250034000 | -0.002655000 |
| 6 | -0.836433000 | 1.097289000  | 0.045240000  |
| 7 | -2.078704000 | 1.682053000  | -0.089875000 |
| 1 | 0.089897000  | 1.657416000  | 0.153201000  |
| 1 | -0.299391000 | -1.054616000 | 0.070199000  |
| 6 | -3.012688000 | -1.778022000 | -0.325684000 |
| 1 | -4.090494000 | -1.625812000 | -0.229530000 |
| 1 | -2.819112000 | -2.111897000 | -1.349444000 |
| 6 | -2.491972000 | -2.777869000 | 0.681689000  |

|   |              |              |              |
|---|--------------|--------------|--------------|
| 1 | -2.680404000 | -2.446642000 | 1.704751000  |
| 1 | -1.419200000 | -2.944458000 | 0.566707000  |
| 6 | -2.338145000 | 3.112606000  | -0.059767000 |
| 1 | -2.142014000 | 3.505599000  | 0.938165000  |
| 1 | -1.685141000 | 3.614049000  | -0.773099000 |
| 1 | -3.376710000 | 3.299912000  | -0.326230000 |
| 1 | -2.993793000 | -3.735166000 | 0.535077000  |
| 1 | -4.061719000 | 0.874533000  | -0.336258000 |
| 7 | 1.797095000  | -0.053241000 | 0.268680000  |
| 7 | 2.713877000  | 0.987808000  | 0.196417000  |
| 8 | 3.921961000  | 0.848933000  | 0.209708000  |
| 8 | 2.137337000  | 2.095448000  | 0.207952000  |
| 7 | 2.236805000  | -1.290163000 | -0.153509000 |
| 8 | 3.288296000  | -1.505653000 | -0.728456000 |
| 8 | 1.365498000  | -2.169276000 | 0.049437000  |

d) E(RM06L) = -809.809225258

|   |              |              |              |
|---|--------------|--------------|--------------|
| 7 | 2.105778000  | 0.572869000  | 0.343896000  |
| 6 | 1.245873000  | -0.449692000 | 0.330154000  |
| 6 | 3.342233000  | 0.122354000  | -0.063069000 |
| 6 | 3.219519000  | -1.207075000 | -0.316921000 |
| 7 | 1.905686000  | -1.541802000 | -0.069286000 |
| 1 | 3.941141000  | -1.936097000 | -0.644628000 |
| 1 | 4.191841000  | 0.780844000  | -0.132087000 |
| 6 | 1.748941000  | 1.974392000  | 0.638705000  |
| 1 | 0.944117000  | 1.947940000  | 1.372754000  |
| 1 | 2.632221000  | 2.424036000  | 1.099453000  |
| 6 | 1.307713000  | 2.711270000  | -0.605476000 |
| 1 | 0.396853000  | 2.268645000  | -1.012854000 |
| 1 | 2.086432000  | 2.716266000  | -1.372684000 |
| 6 | 1.313030000  | -2.868431000 | -0.208611000 |
| 1 | 1.514654000  | -3.247577000 | -1.210326000 |
| 1 | 1.745858000  | -3.543364000 | 0.530725000  |
| 1 | 0.236965000  | -2.784134000 | -0.062292000 |
| 1 | 1.072147000  | 3.745430000  | -0.350393000 |
| 1 | 0.178084000  | -0.390820000 | 0.540096000  |
| 7 | -3.020397000 | 0.242316000  | -0.234380000 |
| 7 | -2.060767000 | 1.191807000  | -0.008336000 |
| 8 | -1.145267000 | 1.033968000  | 0.828774000  |
| 8 | -2.235697000 | 2.253748000  | -0.599147000 |
| 7 | -2.601776000 | -1.047692000 | -0.001830000 |
| 8 | -1.407573000 | -1.391289000 | -0.148433000 |
| 8 | -3.499443000 | -1.846498000 | 0.216691000  |

[8] 1-ethyl-3-methylimidazolium 5-cyano tetrazolate([EMIm]<sup>+</sup>[CNTz]<sup>-</sup>)

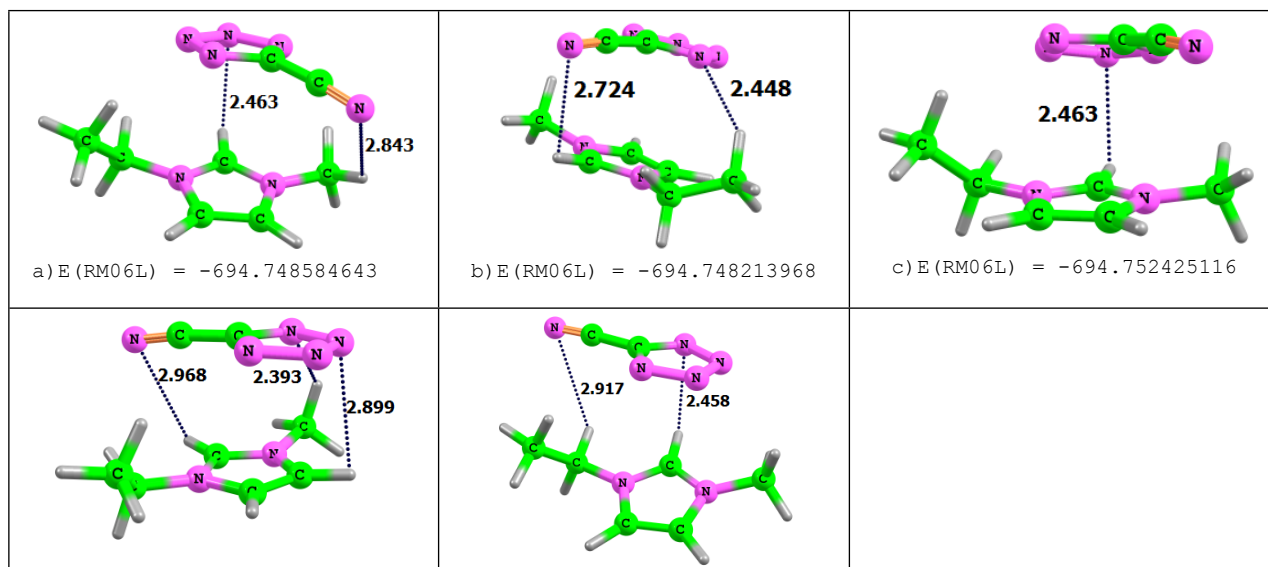



|                              |                              |  |
|------------------------------|------------------------------|--|
| d) E(RM06L) = -694.748861957 | e) E(RM06L) = -694.749384563 |  |
|------------------------------|------------------------------|--|

**Fig. S10. Optimized conformers of 1-ethyl-3-methylimidazolium 5-cyano tetrazolate. All distance parameters in Å and energy in au.**

**Table S7. Relative energy of the a-e conformations.**

| Conformation | Rel. Energy (kJ/mol) |
|--------------|----------------------|
| a            | 10.0735              |
| b            | 11.0458              |
| c            | 0.0000               |
| d            | 9.3461               |
| e            | 7.9753               |

**X, Y, Z Cartesian coordinates of conformers (coordinates in Å and energy in au.)**

|                              |              |              |              |
|------------------------------|--------------|--------------|--------------|
| a) E(RM06L) = -694.748584643 |              |              |              |
| 7                            | 0.646284000  | -0.968398000 | 1.609885000  |
| 7                            | 1.650041000  | -1.195697000 | 0.757864000  |
| 7                            | 0.427744000  | 0.337615000  | 1.717494000  |
| 7                            | 1.281292000  | 1.008116000  | 0.939594000  |
| 6                            | 2.022818000  | 0.038805000  | 0.370523000  |
| 7                            | -1.446096000 | 0.625788000  | -0.652462000 |
| 6                            | -0.710485000 | -0.420050000 | -1.028910000 |
| 6                            | -2.502892000 | 0.165311000  | 0.097327000  |
| 6                            | -2.389808000 | -1.187023000 | 0.160760000  |
| 7                            | -1.270704000 | -1.534736000 | -0.557710000 |
| 1                            | 0.212103000  | -0.371114000 | -1.584510000 |
| 1                            | -2.984180000 | -1.923962000 | 0.672656000  |
| 1                            | -3.220753000 | 0.831935000  | 0.540708000  |
| 6                            | -0.659337000 | -2.857896000 | -0.584400000 |
| 1                            | 0.076183000  | -2.894341000 | -1.385044000 |
| 1                            | -0.150418000 | -3.020479000 | 0.367648000  |
| 1                            | -1.432421000 | -3.605777000 | -0.757183000 |
| 6                            | -1.099022000 | 2.037152000  | -0.909096000 |
| 1                            | -0.039002000 | 2.039280000  | -1.169138000 |
| 1                            | -1.672706000 | 2.369571000  | -1.780059000 |
| 6                            | -1.347452000 | 2.901380000  | 0.304556000  |
| 1                            | -0.815268000 | 2.501523000  | 1.169360000  |
| 1                            | -2.411781000 | 2.988980000  | 0.537289000  |
| 1                            | -0.975000000 | 3.907075000  | 0.105466000  |
| 6                            | 3.009984000  | 0.288950000  | -0.611780000 |
| 7                            | 3.778638000  | 0.495530000  | -1.459105000 |
| b) E(RM06L) = -694.748213968 |              |              |              |
| 7                            | 0.820862000  | -2.246781000 | -0.909405000 |
| 7                            | 0.247204000  | -1.946051000 | 0.256662000  |
| 7                            | 1.940756000  | -1.549233000 | -1.059989000 |
| 7                            | 2.139090000  | -0.766585000 | 0.002561000  |
| 6                            | 1.084974000  | -1.040520000 | 0.796882000  |
| 7                            | -1.479341000 | 0.748557000  | -0.281276000 |
| 6                            | -0.631285000 | 1.628435000  | 0.254291000  |
| 6                            | -0.956778000 | 0.310877000  | -1.479462000 |
| 6                            | 0.228947000  | 0.948299000  | -1.654798000 |
| 7                            | 0.412885000  | 1.769049000  | -0.564305000 |
| 1                            | -0.729487000 | 2.082094000  | 1.226719000  |
| 1                            | 0.982712000  | 0.836015000  | -2.414714000 |
| 1                            | -1.431536000 | -0.454746000 | -2.066951000 |
| 6                            | 1.657867000  | 2.453450000  | -0.239296000 |
| 1                            | 1.518013000  | 3.033090000  | 0.671054000  |
| 1                            | 2.425715000  | 1.690572000  | -0.082325000 |
| 1                            | 1.937795000  | 3.115565000  | -1.058269000 |
| 6                            | -2.710523000 | 0.269346000  | 0.375989000  |
| 1                            | -2.522452000 | 0.339459000  | 1.450368000  |
| 1                            | -3.516929000 | 0.968454000  | 0.132278000  |
| 6                            | -3.048602000 | -1.147002000 | -0.024347000 |

|   |              |              |              |
|---|--------------|--------------|--------------|
| 1 | -2.194513000 | -1.808942000 | 0.140593000  |
| 1 | -3.354942000 | -1.211485000 | -1.070966000 |
| 1 | -3.887699000 | -1.495102000 | 0.579374000  |
| 6 | 0.805572000  | -0.334458000 | 1.986176000  |
| 7 | 0.517442000  | 0.330253000  | 2.898642000  |

c) E(RM06L) = -694.752425116

|   |              |              |              |
|---|--------------|--------------|--------------|
| 7 | 0.306346000  | 2.127524000  | -1.263152000 |
| 7 | 1.446030000  | 1.573200000  | -0.846456000 |
| 7 | -0.573619000 | 2.158024000  | -0.265427000 |
| 7 | -0.038819000 | 1.623348000  | 0.834593000  |
| 6 | 1.202663000  | 1.279602000  | 0.446943000  |
| 7 | -1.436535000 | -0.909623000 | -0.277143000 |
| 6 | -0.415918000 | -0.792113000 | -1.125530000 |
| 6 | -1.061176000 | -1.751992000 | 0.744994000  |
| 6 | 0.215377000  | -2.144583000 | 0.492655000  |
| 7 | 0.599679000  | -1.538402000 | -0.680989000 |
| 1 | -0.381686000 | -0.127408000 | -1.975275000 |
| 1 | 0.895632000  | -2.756819000 | 1.059949000  |
| 1 | -1.712124000 | -1.973163000 | 1.572070000  |
| 6 | 1.925665000  | -1.598908000 | -1.289023000 |
| 1 | 2.147003000  | -0.623571000 | -1.724726000 |
| 1 | 2.652527000  | -1.800133000 | -0.503918000 |
| 1 | 1.960169000  | -2.384765000 | -2.044832000 |
| 6 | -2.708838000 | -0.168938000 | -0.390333000 |
| 1 | -2.513962000 | 0.645704000  | -1.090258000 |
| 1 | -3.447056000 | -0.846189000 | -0.831651000 |
| 6 | -3.159629000 | 0.381389000  | 0.941574000  |
| 1 | -2.375136000 | 1.001265000  | 1.379098000  |
| 1 | -3.435553000 | -0.408908000 | 1.644539000  |
| 1 | -4.043886000 | 1.001052000  | 0.786617000  |
| 6 | 2.094969000  | 0.523210000  | 1.240892000  |
| 7 | 2.796261000  | -0.190224000 | 1.835054000  |

d) E(RM06L) = -694.748861957

|   |              |              |              |
|---|--------------|--------------|--------------|
| 7 | 1.467913000  | -1.820387000 | -1.290587000 |
| 7 | 0.364752000  | -2.013272000 | -0.570306000 |
| 7 | 2.362537000  | -1.138202000 | -0.581915000 |
| 7 | 1.873688000  | -0.864415000 | 0.629762000  |
| 6 | 0.647143000  | -1.420385000 | 0.607116000  |
| 7 | -1.268548000 | 1.001296000  | -0.331513000 |
| 6 | -0.503010000 | 1.609458000  | 0.577310000  |
| 6 | -0.525867000 | 0.823276000  | -1.477272000 |
| 6 | 0.705117000  | 1.348213000  | -1.243380000 |
| 7 | 0.696158000  | 1.843134000  | 0.040866000  |
| 1 | -0.790792000 | 1.820760000  | 1.593916000  |
| 1 | 1.595779000  | 1.354194000  | -1.847429000 |
| 1 | -0.908700000 | 0.295494000  | -2.332808000 |
| 6 | 1.875492000  | 2.298207000  | 0.765841000  |
| 1 | 2.485505000  | 1.420219000  | 0.993616000  |
| 1 | 2.427493000  | 3.005474000  | 0.148267000  |
| 1 | 1.561967000  | 2.786993000  | 1.686489000  |
| 6 | -2.643856000 | 0.523070000  | -0.089132000 |
| 1 | -2.725985000 | 0.393770000  | 0.992109000  |
| 1 | -3.334204000 | 1.314881000  | -0.396985000 |
| 6 | -2.915857000 | -0.777362000 | -0.808368000 |
| 1 | -2.139223000 | -1.516568000 | -0.597673000 |
| 1 | -2.976411000 | -0.642905000 | -1.890973000 |
| 1 | -3.875646000 | -1.174049000 | -0.475533000 |
| 6 | -0.301280000 | -1.248626000 | 1.637720000  |
| 7 | -1.117511000 | -1.007207000 | 2.433406000  |

e) E(RM06L) = -694.749384563

|   |              |              |              |
|---|--------------|--------------|--------------|
| 7 | -0.079906000 | -2.434447000 | 0.002858000  |
| 7 | 1.044639000  | -2.110120000 | -0.634914000 |
| 7 | -0.194319000 | -1.718073000 | 1.121381000  |
| 7 | 0.851903000  | -0.902866000 | 1.249388000  |
| 6 | 1.598676000  | -1.173909000 | 0.159552000  |
| 7 | -0.624454000 | 1.448463000  | -0.405028000 |
| 6 | -1.030798000 | 0.269057000  | -0.874839000 |
| 6 | -1.572076000 | 1.918126000  | 0.475328000  |

|   |              |              |              |
|---|--------------|--------------|--------------|
| 6 | -2.567671000 | 0.994605000  | 0.519235000  |
| 7 | -2.216821000 | -0.021575000 | -0.337225000 |
| 1 | -0.461577000 | -0.382804000 | -1.522280000 |
| 1 | -3.479882000 | 0.965148000  | 1.089910000  |
| 1 | -1.455547000 | 2.854896000  | 0.991893000  |
| 6 | -2.908891000 | -1.299312000 | -0.460473000 |
| 1 | -2.699685000 | -1.894621000 | 0.429369000  |
| 1 | -3.977212000 | -1.116176000 | -0.575377000 |
| 1 | -2.520257000 | -1.832953000 | -1.324060000 |
| 6 | 0.670719000  | 2.083576000  | -0.712373000 |
| 1 | 1.237050000  | 1.355626000  | -1.296702000 |
| 1 | 0.473920000  | 2.945218000  | -1.357586000 |
| 6 | 1.414117000  | 2.469479000  | 0.546123000  |
| 1 | 1.489698000  | 1.616280000  | 1.223695000  |
| 1 | 0.926547000  | 3.295863000  | 1.069153000  |
| 1 | 2.423950000  | 2.786036000  | 0.282895000  |
| 6 | 2.795966000  | -0.487897000 | -0.151678000 |
| 7 | 3.739350000  | 0.133637000  | -0.427339000 |

[9] 1-ethyl-3-methylimidazolium 5-amino tetrazolate ( $[EMIm]^+[NH_2tz]^-$ )

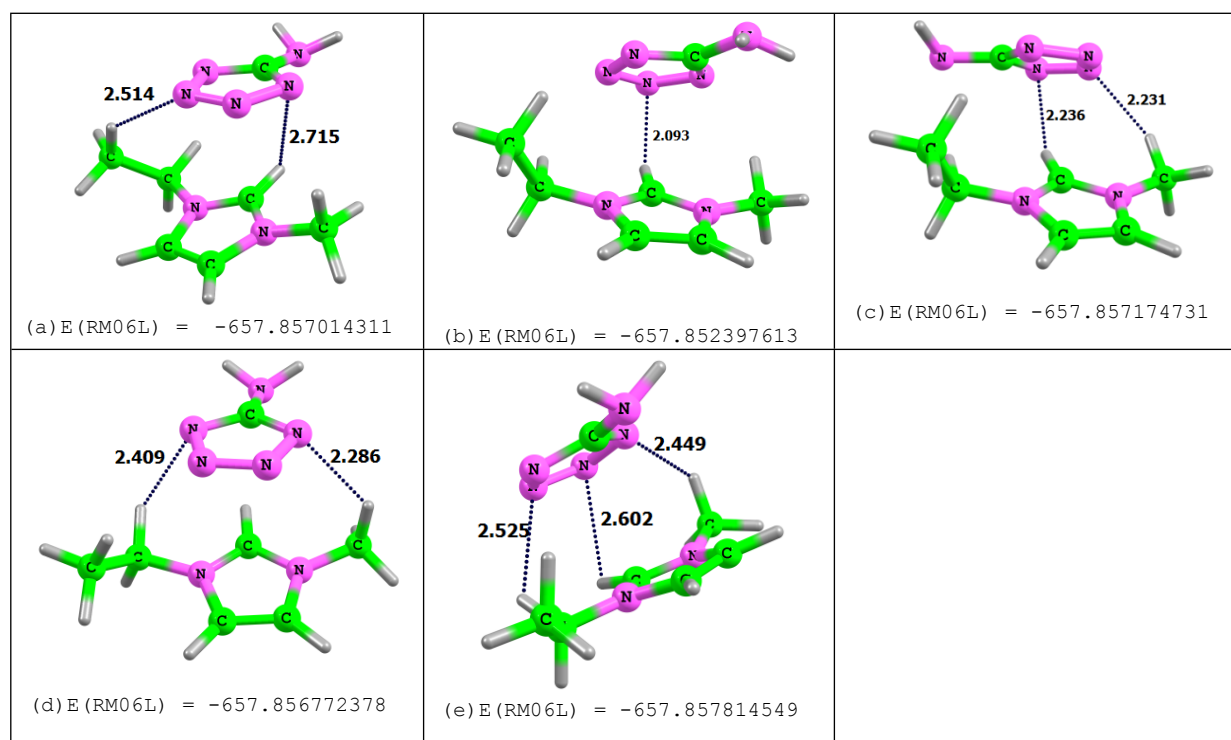

Fig. S11. Optimized conformers of 1-ethyl-3-methylimidazolium 5-amino tetrazolate. All distance parameters in Å and energy in au.

Table S8. Relative energy of the a-e conformations.

| Conformation | Rel. Energy (kJ/mol) |
|--------------|----------------------|
| a            | 2.0990               |
| b            | 14.2086              |
| c            | 1.6782               |
| d            | 2.7336               |
| e            | 0.0000               |

**X, Y, Z Cartesian coordinates of conformers (coordinates in Å and energy in au.)**

(a)E(RM06L) = -657.857014311

|   |              |              |              |
|---|--------------|--------------|--------------|
| 7 | -1.226284000 | 0.632034000  | 1.460436000  |
| 7 | -2.100576000 | 0.710169000  | 0.423083000  |
| 7 | -0.746555000 | -0.585918000 | 1.548139000  |
| 7 | -1.285107000 | -1.363938000 | 0.573104000  |
| 6 | -2.101753000 | -0.529447000 | -0.073978000 |
| 7 | 1.481553000  | -0.319175000 | -0.557533000 |
| 6 | 0.552608000  | 0.550387000  | -0.956267000 |
| 6 | 2.351077000  | 0.327802000  | 0.289460000  |
| 6 | 1.927126000  | 1.613517000  | 0.391069000  |
| 7 | 0.809004000  | 1.735376000  | -0.400225000 |
| 1 | -0.302235000 | 0.318229000  | -1.572635000 |
| 1 | 2.299585000  | 2.438619000  | 0.973253000  |
| 1 | 3.169976000  | -0.182502000 | 0.764396000  |
| 6 | -0.084250000 | 2.885805000  | -0.424697000 |
| 1 | -0.772138000 | 2.783820000  | -1.260781000 |
| 1 | -0.665204000 | 2.885486000  | 0.499216000  |
| 1 | 0.507183000  | 3.795478000  | -0.531770000 |
| 6 | 1.481318000  | -1.757044000 | -0.877946000 |
| 1 | 0.491152000  | -1.967063000 | -1.285274000 |
| 1 | 2.229535000  | -1.927590000 | -1.659305000 |
| 6 | 1.731309000  | -2.595561000 | 0.353541000  |
| 1 | 1.009631000  | -2.335853000 | 1.130279000  |
| 1 | 2.747306000  | -2.470490000 | 0.737352000  |
| 1 | 1.606337000  | -3.649329000 | 0.099613000  |
| 7 | -2.767253000 | -0.877337000 | -1.256299000 |
| 1 | -3.604502000 | -0.320923000 | -1.377908000 |
| 1 | -3.014705000 | -1.859123000 | -1.258456000 |

(b)E(RM06L) = -657.852397613

|   |              |              |              |
|---|--------------|--------------|--------------|
| 7 | -1.455448000 | -1.353886000 | -1.387706000 |
| 7 | -2.239294000 | -0.553476000 | -0.620270000 |
| 7 | -0.575272000 | -1.970036000 | -0.628024000 |
| 7 | -0.744873000 | -1.605799000 | 0.665291000  |
| 6 | -1.777849000 | -0.756614000 | 0.619106000  |
| 7 | 1.638491000  | 0.341150000  | -0.301348000 |
| 6 | 0.512961000  | 0.715757000  | -0.907678000 |
| 6 | 1.930837000  | 1.250883000  | 0.689047000  |
| 6 | 0.952363000  | 2.194551000  | 0.667065000  |
| 7 | 0.076476000  | 1.841409000  | -0.336112000 |
| 1 | -0.016708000 | 0.141478000  | -1.662007000 |
| 1 | 0.797304000  | 3.070599000  | 1.273940000  |
| 1 | 2.792590000  | 1.146562000  | 1.325451000  |
| 6 | -1.174007000 | 2.504405000  | -0.689757000 |
| 1 | -1.895068000 | 1.729136000  | -0.967804000 |
| 1 | -1.537945000 | 3.047626000  | 0.181121000  |
| 1 | -1.014721000 | 3.204185000  | -1.511588000 |
| 6 | 2.372033000  | -0.907964000 | -0.586458000 |
| 1 | 1.759177000  | -1.448320000 | -1.310165000 |
| 1 | 3.324049000  | -0.628120000 | -1.049212000 |
| 6 | 2.552592000  | -1.739217000 | 0.662590000  |
| 1 | 1.575698000  | -1.971615000 | 1.093473000  |
| 1 | 3.174927000  | -1.235445000 | 1.407867000  |
| 1 | 3.049455000  | -2.674291000 | 0.399106000  |
| 7 | -2.359868000 | -0.200259000 | 1.752737000  |
| 1 | -2.888961000 | 0.638574000  | 1.563332000  |
| 1 | -1.714864000 | -0.084900000 | 2.521013000  |

(c)E(RM06L) = -657.857174731

|   |              |              |              |
|---|--------------|--------------|--------------|
| 7 | 0.989820000  | -2.163397000 | 0.188967000  |
| 7 | 1.897509000  | -1.581441000 | -0.634010000 |
| 7 | 0.744548000  | -1.378460000 | 1.216280000  |
| 7 | 1.488092000  | -0.250766000 | 1.116142000  |
| 6 | 2.175151000  | -0.428219000 | -0.016981000 |
| 7 | -1.027378000 | 1.164005000  | -0.428497000 |
| 6 | -0.893260000 | -0.132457000 | -0.704949000 |
| 6 | -2.218931000 | 1.351503000  | 0.237197000  |

|   |              |              |              |
|---|--------------|--------------|--------------|
| 6 | -2.809183000 | 0.131887000  | 0.344093000  |
| 7 | -1.969472000 | -0.779515000 | -0.254328000 |
| 1 | -0.031926000 | -0.591632000 | -1.177894000 |
| 1 | -3.738344000 | -0.167324000 | 0.798435000  |
| 1 | -2.536201000 | 2.320955000  | 0.580264000  |
| 6 | -2.131538000 | -2.229495000 | -0.287341000 |
| 1 | -2.688316000 | -2.526066000 | -1.177698000 |
| 1 | -1.132059000 | -2.675222000 | -0.273646000 |
| 1 | -2.673203000 | -2.536372000 | 0.605638000  |
| 6 | 0.005008000  | 2.182567000  | -0.682621000 |
| 1 | 0.848213000  | 1.659826000  | -1.140915000 |
| 1 | -0.402444000 | 2.890800000  | -1.410950000 |
| 6 | 0.443606000  | 2.860891000  | 0.595951000  |
| 1 | 0.821952000  | 2.113167000  | 1.296854000  |
| 1 | -0.368893000 | 3.422678000  | 1.064290000  |
| 1 | 1.244349000  | 3.567156000  | 0.368916000  |
| 7 | 3.022678000  | 0.550352000  | -0.553907000 |
| 1 | 3.698120000  | 0.131056000  | -1.181040000 |
| 1 | 3.513048000  | 1.045467000  | 0.181127000  |

(d) E (RM06L) = -657.856772378

|   |              |              |              |
|---|--------------|--------------|--------------|
| 7 | -0.960978000 | -0.209082000 | 1.662550000  |
| 7 | -2.020310000 | 0.052731000  | 0.855129000  |
| 7 | -0.340357000 | -1.285724000 | 1.242421000  |
| 7 | -0.959548000 | -1.776796000 | 0.136584000  |
| 6 | -1.972315000 | -0.927128000 | -0.052200000 |
| 7 | 1.481106000  | 0.140535000  | -0.556037000 |
| 6 | 0.349720000  | 0.724636000  | -0.952006000 |
| 6 | 2.088902000  | 0.951556000  | 0.372898000  |
| 6 | 1.296529000  | 2.043279000  | 0.530829000  |
| 7 | 0.222495000  | 1.890076000  | -0.313539000 |
| 1 | -0.373165000 | 0.302255000  | -1.632423000 |
| 1 | 1.383553000  | 2.893081000  | 1.185234000  |
| 1 | 3.003497000  | 0.672111000  | 0.864293000  |
| 6 | -0.980280000 | 2.712269000  | -0.327140000 |
| 1 | -1.397932000 | 2.719147000  | -1.333590000 |
| 1 | -1.702161000 | 2.262231000  | 0.361594000  |
| 1 | -0.717243000 | 3.728126000  | -0.037071000 |
| 6 | 1.923507000  | -1.197804000 | -0.992784000 |
| 1 | 1.005879000  | -1.729894000 | -1.254918000 |
| 1 | 2.543591000  | -1.069792000 | -1.886279000 |
| 6 | 2.646471000  | -1.936074000 | 0.107706000  |
| 1 | 2.002087000  | -1.996468000 | 0.987857000  |
| 1 | 3.599472000  | -1.468271000 | 0.369869000  |
| 1 | 2.866290000  | -2.949265000 | -0.232123000 |
| 7 | -2.806935000 | -0.968328000 | -1.175508000 |
| 1 | -3.716307000 | -0.573938000 | -0.968543000 |
| 1 | -2.921074000 | -1.917606000 | -1.508919000 |

(e) E (RM06L) = -657.857814549

|   |              |              |              |
|---|--------------|--------------|--------------|
| 7 | -0.446588000 | 1.419292000  | -1.596654000 |
| 7 | -1.308128000 | 1.497433000  | -0.558835000 |
| 7 | 0.785724000  | 1.603602000  | -1.166283000 |
| 7 | 0.779333000  | 1.802377000  | 0.174205000  |
| 6 | -0.516153000 | 1.730913000  | 0.493311000  |
| 7 | -0.323670000 | -1.413357000 | -0.203729000 |
| 6 | 0.815715000  | -1.098955000 | -0.822084000 |
| 6 | -0.077793000 | -1.496638000 | 1.150642000  |
| 6 | 1.239018000  | -1.221846000 | 1.332854000  |
| 7 | 1.785367000  | -0.994784000 | 0.089138000  |
| 1 | 0.919198000  | -0.896277000 | -1.874075000 |
| 1 | 1.825598000  | -1.136324000 | 2.231085000  |
| 1 | -0.859058000 | -1.695555000 | 1.861728000  |
| 6 | 3.078279000  | -0.378784000 | -0.168199000 |
| 1 | 3.407203000  | -0.637163000 | -1.173227000 |
| 1 | 2.952910000  | 0.704188000  | -0.088612000 |
| 1 | 3.800443000  | -0.748590000 | 0.558322000  |
| 6 | -1.615469000 | -1.577464000 | -0.898333000 |
| 1 | -1.624972000 | -0.812425000 | -1.679446000 |

|   |              |              |              |
|---|--------------|--------------|--------------|
| 1 | -1.618826000 | -2.568443000 | -1.364809000 |
| 6 | -2.785455000 | -1.395272000 | 0.034564000  |
| 1 | -2.743005000 | -0.409340000 | 0.501377000  |
| 1 | -2.833665000 | -2.171984000 | 0.802697000  |
| 1 | -3.708943000 | -1.451403000 | -0.543037000 |
| 7 | -0.993096000 | 1.789378000  | 1.805628000  |
| 1 | -1.923553000 | 2.187770000  | 1.835896000  |
| 1 | -0.374778000 | 2.336232000  | 2.391281000  |

[10] 1-ethyl-3-methylimidazolium 5-nitro tetrazolate ([EMIm]<sup>+</sup>[NO<sub>2</sub>tz]<sup>-</sup>)

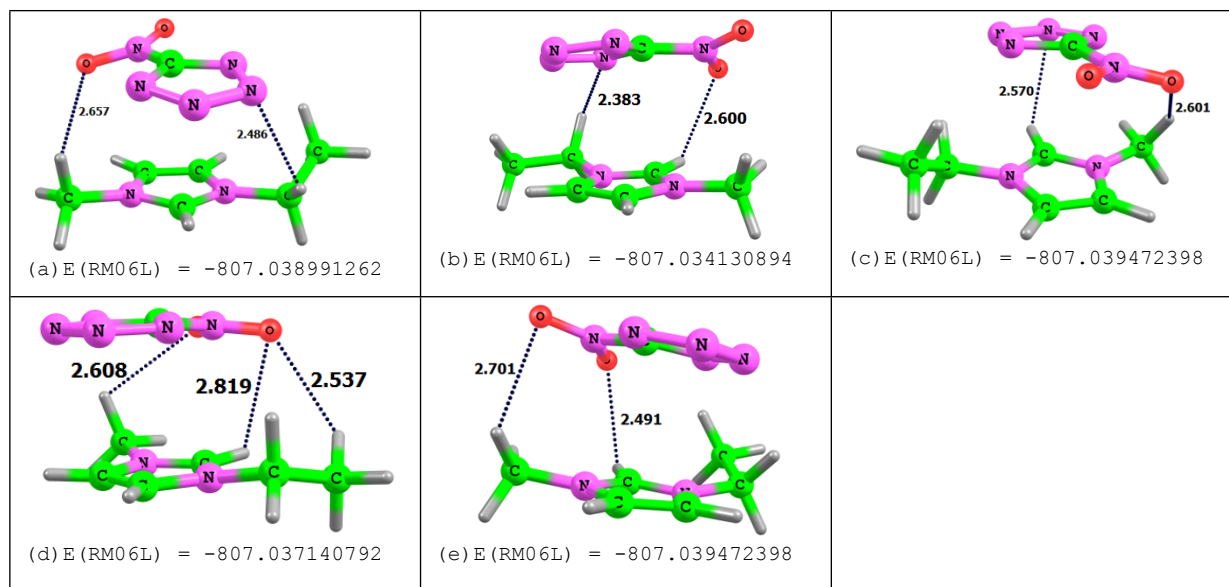

Fig. S12. Optimized conformers of 1-ethyl-3-methylimidazolium 5-nitro tetrazolate. All distance parameters in Å and energy in au.

Table S9. Relative energy of the a-e conformations

| Conformation | Rel. Energy (kJ/mol) |
|--------------|----------------------|
| a            | 1.2620               |
| b            | 14.0107              |
| c            | 0.0000               |
| d            | 6.1158               |
| e            | 0.0000               |

X, Y, Z Cartesian coordinates of conformers (coordinates in Å and energy in au.)

(a) E (RM06L) = -807.038991262

|   |              |              |              |
|---|--------------|--------------|--------------|
| 7 | -0.277920000 | -1.368406000 | -2.085439000 |
| 7 | -1.309830000 | -0.972815000 | -1.345676000 |
| 7 | 0.684644000  | -1.864461000 | -1.287954000 |
| 7 | 0.289880000  | -1.816214000 | -0.019430000 |
| 6 | -0.924037000 | -1.266742000 | -0.100733000 |
| 7 | 1.507512000  | 0.959854000  | -0.001568000 |
| 6 | 0.642629000  | 1.279592000  | -0.965135000 |
| 6 | 0.958891000  | 1.312275000  | 1.210971000  |
| 6 | -0.258035000 | 1.862882000  | 0.955317000  |
| 7 | -0.436208000 | 1.837884000  | -0.408288000 |
| 1 | 0.756068000  | 1.043044000  | -2.011425000 |
| 1 | -1.027813000 | 2.219489000  | 1.618495000  |
| 1 | 1.457835000  | 1.116392000  | 2.143419000  |
| 6 | -1.670868000 | 2.159833000  | -1.119667000 |
| 1 | -2.165836000 | 1.222702000  | -1.385579000 |

|   |              |              |              |
|---|--------------|--------------|--------------|
| 1 | -2.306363000 | 2.744035000  | -0.458403000 |
| 1 | -1.435547000 | 2.739645000  | -2.011520000 |
| 6 | 2.798150000  | 0.275645000  | -0.229148000 |
| 1 | 2.648653000  | -0.350345000 | -1.111996000 |
| 1 | 3.542753000  | 1.044562000  | -0.458227000 |
| 6 | 3.202828000  | -0.572445000 | 0.951471000  |
| 1 | 2.415728000  | -1.291779000 | 1.186835000  |
| 1 | 3.433763000  | 0.027040000  | 1.835596000  |
| 1 | 4.105753000  | -1.126807000 | 0.692724000  |
| 7 | -1.677921000 | -0.874972000 | 1.062438000  |
| 8 | -1.319225000 | -1.297922000 | 2.153414000  |
| 8 | -2.603705000 | -0.077119000 | 0.889466000  |

(b) E (RM06L) = -807.034130894

|   |              |              |              |
|---|--------------|--------------|--------------|
| 7 | 0.738084000  | -2.101977000 | 0.160091000  |
| 7 | 0.048138000  | -1.434390000 | -0.759029000 |
| 7 | -0.006199000 | -2.240273000 | 1.274755000  |
| 7 | -1.194144000 | -1.683169000 | 1.093426000  |
| 6 | -1.121136000 | -1.207991000 | -0.154931000 |
| 7 | 1.601670000  | 0.908110000  | -0.183772000 |
| 6 | 0.505662000  | 1.571803000  | -0.551971000 |
| 6 | 1.526973000  | 0.657818000  | 1.167209000  |
| 6 | 0.369293000  | 1.208852000  | 1.615504000  |
| 7 | -0.255055000 | 1.776459000  | 0.526512000  |
| 1 | 0.232297000  | 1.825632000  | -1.562146000 |
| 1 | -0.081538000 | 1.209285000  | 2.593200000  |
| 1 | 2.270232000  | 0.076116000  | 1.682408000  |
| 6 | -1.561209000 | 2.423082000  | 0.542808000  |
| 1 | -2.257251000 | 1.794377000  | 1.098707000  |
| 1 | -1.490763000 | 3.404584000  | 1.013333000  |
| 1 | -1.922273000 | 2.517380000  | -0.479257000 |
| 6 | 2.555548000  | 0.308160000  | -1.141251000 |
| 1 | 1.966258000  | -0.404603000 | -1.727415000 |
| 1 | 2.901512000  | 1.115086000  | -1.793145000 |
| 6 | 3.697428000  | -0.387376000 | -0.446066000 |
| 1 | 3.332090000  | -1.241573000 | 0.128354000  |
| 1 | 4.260083000  | 0.286260000  | 0.205856000  |
| 1 | 4.386653000  | -0.770472000 | -1.199203000 |
| 7 | -2.154537000 | -0.408470000 | -0.749404000 |
| 8 | -3.261292000 | -0.398102000 | -0.225049000 |
| 8 | -1.848502000 | 0.276579000  | -1.735770000 |

(c) E (RM06L) = -807.039472398

|   |              |              |              |
|---|--------------|--------------|--------------|
| 7 | -0.908305000 | -1.325666000 | -2.044020000 |
| 7 | -1.668206000 | -0.957649000 | -1.019359000 |
| 7 | 0.257425000  | -1.825986000 | -1.586588000 |
| 7 | 0.265242000  | -1.802701000 | -0.258946000 |
| 6 | -0.920166000 | -1.266803000 | 0.043826000  |
| 7 | 1.482246000  | 0.947897000  | -0.210699000 |
| 6 | 0.501053000  | 1.191245000  | -1.081429000 |
| 6 | 1.104164000  | 1.436073000  | 1.019863000  |
| 6 | -0.130135000 | 1.985896000  | 0.872015000  |
| 7 | -0.489093000 | 1.823031000  | -0.446501000 |
| 1 | 0.468155000  | 0.844241000  | -2.102553000 |
| 1 | -0.802040000 | 2.423663000  | 1.590243000  |
| 1 | 1.718600000  | 1.323817000  | 1.895556000  |
| 6 | -1.804938000 | 2.114290000  | -1.005195000 |
| 1 | -2.543171000 | 1.512120000  | -0.473883000 |
| 1 | -2.017159000 | 3.179220000  | -0.904476000 |
| 1 | -1.813233000 | 1.824387000  | -2.053234000 |
| 6 | 2.699942000  | 0.168592000  | -0.520114000 |
| 1 | 2.415396000  | -0.510119000 | -1.328200000 |
| 1 | 3.456092000  | 0.866637000  | -0.892996000 |
| 6 | 3.185024000  | -0.608200000 | 0.680012000  |
| 1 | 2.387891000  | -1.250441000 | 1.060816000  |
| 1 | 3.551222000  | 0.043476000  | 1.477462000  |
| 1 | 4.017250000  | -1.244018000 | 0.375482000  |
| 7 | -1.271325000 | -0.876258000 | 1.384425000  |
| 8 | -0.546998000 | -1.247364000 | 2.300953000  |

8 -2.243572000 -0.129912000 1.520762000

(d)E(RM06L) = -807.037140792

|   |              |              |              |
|---|--------------|--------------|--------------|
| 7 | -1.707637000 | -1.644674000 | -1.412138000 |
| 7 | -0.809253000 | -1.826159000 | -0.453431000 |
| 7 | -2.569478000 | -0.672994000 | -1.051756000 |
| 7 | -2.245701000 | -0.206794000 | 0.147113000  |
| 6 | -1.177951000 | -0.941542000 | 0.480483000  |
| 7 | 1.400937000  | 0.322286000  | -0.889936000 |
| 6 | 1.136952000  | 1.154050000  | 0.120064000  |
| 6 | 0.474009000  | 0.537459000  | -1.885712000 |
| 6 | -0.358267000 | 1.519984000  | -1.455950000 |
| 7 | 0.071769000  | 1.893591000  | -0.202713000 |
| 1 | 1.648650000  | 1.180588000  | 1.068170000  |
| 1 | -1.245001000 | 1.939414000  | -1.899423000 |
| 1 | 0.451465000  | -0.065724000 | -2.776841000 |
| 6 | -0.666934000 | 2.763985000  | 0.704528000  |
| 1 | -0.889391000 | 3.706386000  | 0.204610000  |
| 1 | -1.585640000 | 2.246980000  | 0.991709000  |
| 1 | -0.064879000 | 2.947132000  | 1.591791000  |
| 6 | 2.336970000  | -0.817547000 | -0.860494000 |
| 1 | 1.714423000  | -1.699231000 | -0.669821000 |
| 1 | 2.751626000  | -0.897935000 | -1.868386000 |
| 6 | 3.415607000  | -0.657494000 | 0.180269000  |
| 1 | 2.999865000  | -0.668918000 | 1.189570000  |
| 1 | 3.996041000  | 0.257401000  | 0.033926000  |
| 1 | 4.103090000  | -1.501036000 | 0.110120000  |
| 7 | -0.402033000 | -0.692876000 | 1.656593000  |
| 8 | -0.761913000 | 0.216607000  | 2.406222000  |
| 8 | 0.635313000  | -1.342242000 | 1.814943000  |

(e)E(RM06L) = -807.039472398

|   |              |              |              |
|---|--------------|--------------|--------------|
| 7 | 0.161572000  | -2.389235000 | -0.545479000 |
| 7 | 0.002540000  | -1.659379000 | 0.552557000  |
| 7 | -0.862145000 | -2.164284000 | -1.393566000 |
| 7 | -1.708716000 | -1.299439000 | -0.855961000 |
| 6 | -1.149335000 | -1.020519000 | 0.327514000  |
| 7 | 1.737726000  | 0.460180000  | -0.400898000 |
| 6 | 0.913695000  | 1.381274000  | 0.094851000  |
| 6 | 1.344769000  | 0.165393000  | -1.687576000 |
| 6 | 0.262294000  | 0.935335000  | -1.963860000 |
| 7 | 0.007792000  | 1.690015000  | -0.839155000 |
| 1 | 0.915406000  | 1.754758000  | 1.103973000  |
| 1 | -0.378060000 | 0.969743000  | -2.828220000 |
| 1 | 1.823093000  | -0.611302000 | -2.259000000 |
| 6 | -1.133968000 | 2.577719000  | -0.658286000 |
| 1 | -1.007111000 | 3.483988000  | -1.251910000 |
| 1 | -2.038951000 | 2.051359000  | -0.962898000 |
| 1 | -1.222047000 | 2.831732000  | 0.396653000  |
| 6 | 2.754177000  | -0.293318000 | 0.356670000  |
| 1 | 2.557179000  | -1.344195000 | 0.128857000  |
| 1 | 3.734438000  | -0.023984000 | -0.048812000 |
| 6 | 2.652592000  | -0.041077000 | 1.839360000  |
| 1 | 1.648597000  | -0.287648000 | 2.194145000  |
| 1 | 2.894053000  | 0.992559000  | 2.103202000  |
| 1 | 3.364023000  | -0.682796000 | 2.359828000  |
| 7 | -1.672343000 | -0.026156000 | 1.219047000  |
| 8 | -2.807927000 | 0.393802000  | 1.025855000  |
| 8 | -0.919691000 | 0.400578000  | 2.106187000  |



[11] 1-ethyl-3-methylimidazolium 5-nitro tetrazolate-2N-oxide ([EMIm]<sup>+</sup>[NO<sub>2</sub>Otz]<sup>-</sup>)

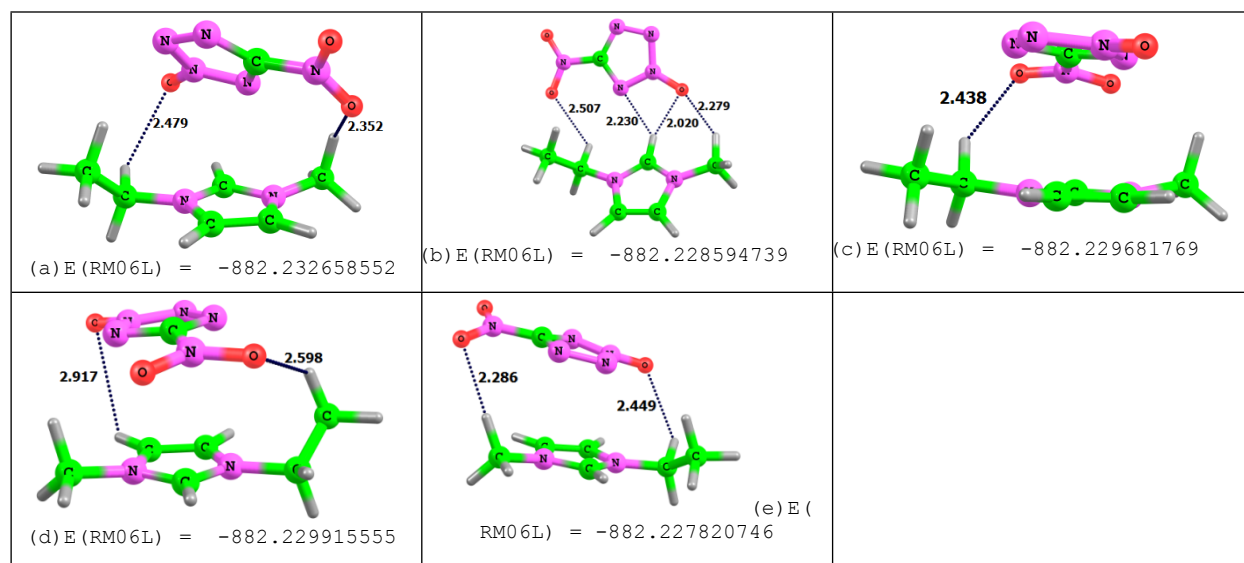

Fig. S13. Optimized conformers of 1-ethyl-3-methylimidazolium 5-nitro tetrazolate-2N-oxide. All distance parameters in Å and energy in au.

Table S10. Relative energy of the a-e conformations.

| Conformation | Rel. Energy (kJ/mol) |
|--------------|----------------------|
| a            | 0.0000               |
| b            | 10.6593              |
| c            | 7.8081               |
| d            | 7.1949               |
| e            | 12.6895              |

X, Y, Z Cartesian coordinates of conformers (coordinates in Å and energy in au.)

(a) E (RM06L) = -882.232658552

|   |              |              |              |
|---|--------------|--------------|--------------|
| 7 | -0.169460000 | -1.369059000 | 1.152990000  |
| 7 | 0.711672000  | -0.374136000 | 1.018038000  |
| 7 | 0.156656000  | -2.470816000 | 0.388034000  |
| 7 | 1.268453000  | -2.157762000 | -0.244457000 |
| 6 | 1.567731000  | -0.921713000 | 0.142193000  |
| 7 | -1.908291000 | 0.683585000  | -0.441396000 |
| 6 | -1.458722000 | 1.345876000  | 0.624537000  |
| 6 | -1.140337000 | 1.038943000  | -1.529362000 |
| 6 | -0.217301000 | 1.936311000  | -1.091551000 |
| 7 | -0.447628000 | 2.131009000  | 0.250345000  |
| 1 | -1.800666000 | 1.192349000  | 1.634693000  |
| 6 | 0.447333000  | 2.821583000  | 1.167662000  |
| 1 | -0.095810000 | 3.064064000  | 2.079255000  |
| 1 | 1.287938000  | 2.159950000  | 1.383276000  |
| 1 | 0.801840000  | 3.738200000  | 0.698475000  |
| 6 | -3.041746000 | -0.260576000 | -0.426711000 |
| 1 | -3.217185000 | -0.489962000 | 0.625266000  |
| 1 | -3.913419000 | 0.268878000  | -0.825270000 |
| 6 | -2.746454000 | -1.523645000 | -1.200558000 |
| 1 | -1.879172000 | -2.046563000 | -0.793032000 |
| 1 | -2.581931000 | -1.330428000 | -2.263472000 |
| 1 | -3.605337000 | -2.192099000 | -1.124074000 |
| 7 | 2.651583000  | -0.169186000 | -0.411519000 |

|   |              |              |              |
|---|--------------|--------------|--------------|
| 8 | 3.475431000  | -0.749034000 | -1.102502000 |
| 8 | 2.664378000  | 1.047519000  | -0.165517000 |
| 8 | -1.212127000 | -1.293474000 | 1.842341000  |
| 1 | -1.312585000 | 0.628520000  | -2.509017000 |
| 1 | 0.590939000  | 2.430877000  | -1.602187000 |

(b)E (RM06L) = -882.228594739

|   |              |              |              |
|---|--------------|--------------|--------------|
| 7 | 0.988729000  | -1.855472000 | -0.118879000 |
| 7 | 1.133012000  | -0.548284000 | -0.362061000 |
| 7 | 2.121000000  | -2.433087000 | 0.383135000  |
| 7 | 3.015872000  | -1.466767000 | 0.458357000  |
| 6 | 2.406853000  | -0.373255000 | 0.015108000  |
| 7 | -1.980109000 | 1.152962000  | -0.298977000 |
| 6 | -1.899537000 | -0.172320000 | -0.421593000 |
| 6 | -3.206636000 | 1.472247000  | 0.244189000  |
| 6 | -3.872002000 | 0.304476000  | 0.448035000  |
| 7 | -3.036100000 | -0.708650000 | 0.031646000  |
| 1 | -1.050825000 | -0.757254000 | -0.761111000 |
| 6 | -3.291114000 | -2.144366000 | 0.085966000  |
| 1 | -2.338509000 | -2.658667000 | -0.040012000 |
| 1 | -3.717266000 | -2.395237000 | 1.056783000  |
| 1 | -3.986299000 | -2.432713000 | -0.703501000 |
| 6 | -0.887834000 | 2.099018000  | -0.607209000 |
| 1 | -0.082251000 | 1.510834000  | -1.049050000 |
| 1 | -1.269279000 | 2.799303000  | -1.355347000 |
| 6 | -0.403703000 | 2.803189000  | 0.638847000  |
| 1 | -0.010670000 | 2.082596000  | 1.358783000  |
| 1 | -1.193352000 | 3.387944000  | 1.118567000  |
| 1 | 0.412406000  | 3.475820000  | 0.375892000  |
| 7 | 3.033667000  | 0.914449000  | -0.053473000 |
| 8 | 4.204185000  | 1.010336000  | 0.282088000  |
| 8 | 2.327803000  | 1.851997000  | -0.447943000 |
| 8 | -0.085279000 | -2.478828000 | -0.332919000 |
| 1 | -3.495481000 | 2.491233000  | 0.439007000  |
| 1 | -4.850794000 | 0.108102000  | 0.851899000  |

(c)E (RM06L) = -882.229681769

|   |              |              |              |
|---|--------------|--------------|--------------|
| 7 | 0.727116000  | 2.081418000  | -0.390895000 |
| 7 | 1.398939000  | 0.957197000  | -0.662416000 |
| 7 | -0.549160000 | 2.084880000  | -0.961063000 |
| 7 | -0.666632000 | 0.935604000  | -1.584836000 |
| 6 | 0.490147000  | 0.297262000  | -1.401401000 |
| 7 | -1.169981000 | -0.721340000 | 1.036678000  |
| 6 | -0.080159000 | -1.494703000 | 1.038127000  |
| 6 | -0.875746000 | 0.441991000  | 1.711667000  |
| 6 | 0.417418000  | 0.353294000  | 2.122259000  |
| 7 | 0.895025000  | -0.862900000 | 1.694005000  |
| 1 | 0.015038000  | -2.445431000 | 0.537725000  |
| 6 | 2.298337000  | -1.257351000 | 1.695025000  |
| 1 | 2.373369000  | -2.313878000 | 1.447307000  |
| 1 | 2.811929000  | -0.669774000 | 0.931356000  |
| 1 | 2.724065000  | -1.073521000 | 2.680529000  |
| 6 | -2.406088000 | -1.026324000 | 0.277515000  |
| 1 | -2.086558000 | -1.238737000 | -0.747721000 |
| 1 | -2.832505000 | -1.937838000 | 0.706341000  |
| 6 | -3.384284000 | 0.119333000  | 0.303919000  |
| 1 | -2.945127000 | 1.017819000  | -0.134968000 |
| 1 | -3.738258000 | 0.340107000  | 1.314223000  |
| 1 | -4.253112000 | -0.149441000 | -0.297303000 |
| 7 | 0.662780000  | -1.068448000 | -1.756403000 |
| 8 | -0.269037000 | -1.652682000 | -2.318323000 |
| 8 | 1.713731000  | -1.618998000 | -1.400063000 |
| 8 | 1.132575000  | 2.984005000  | 0.348832000  |
| 1 | -1.581283000 | 1.248679000  | 1.803123000  |
| 1 | 1.049926000  | 1.077519000  | 2.607673000  |

(d)E (RM06L) = -882.229915555

|   |             |              |              |
|---|-------------|--------------|--------------|
| 7 | 2.283594000 | -0.922614000 | -0.398114000 |
|---|-------------|--------------|--------------|

|   |              |              |              |
|---|--------------|--------------|--------------|
| 7 | 1.877123000  | -0.189084000 | 0.644277000  |
| 7 | 1.404648000  | -1.977408000 | -0.676776000 |
| 7 | 0.433549000  | -1.871104000 | 0.194670000  |
| 6 | 0.732717000  | -0.820184000 | 0.961775000  |
| 7 | -1.640425000 | 0.561292000  | -0.833733000 |
| 6 | -1.173186000 | 1.558347000  | -0.079039000 |
| 6 | -0.708546000 | 0.278632000  | -1.807841000 |
| 6 | 0.337610000  | 1.125893000  | -1.620340000 |
| 7 | 0.025821000  | 1.920557000  | -0.539406000 |
| 1 | -1.647836000 | 1.948582000  | 0.807167000  |
| 6 | 0.950590000  | 2.827638000  | 0.131862000  |
| 1 | 0.404457000  | 3.403081000  | 0.876251000  |
| 1 | 1.717609000  | 2.223199000  | 0.621042000  |
| 1 | 1.394803000  | 3.497187000  | -0.603657000 |
| 6 | -2.926197000 | -0.132622000 | -0.620845000 |
| 1 | -3.229105000 | 0.107456000  | 0.399907000  |
| 1 | -3.656468000 | 0.308969000  | -1.306666000 |
| 6 | -2.797369000 | -1.625907000 | -0.807704000 |
| 1 | -2.016303000 | -2.030328000 | -0.161463000 |
| 1 | -2.570796000 | -1.890402000 | -1.843328000 |
| 1 | -3.747619000 | -2.097504000 | -0.552758000 |
| 7 | -0.185149000 | -0.286835000 | 1.901974000  |
| 8 | -1.287146000 | -0.836041000 | 2.027436000  |
| 8 | 0.136309000  | 0.757899000  | 2.485544000  |
| 8 | 3.277617000  | -0.678945000 | -1.088203000 |
| 1 | -0.842678000 | -0.521715000 | -2.514090000 |
| 1 | 1.291838000  | 1.193749000  | -2.118070000 |

(e)E(RM06L) = -882.227820746

|   |              |              |              |
|---|--------------|--------------|--------------|
| 7 | 0.088530000  | -1.683073000 | -0.064727000 |
| 7 | -1.091144000 | -1.572410000 | 0.553655000  |
| 7 | 0.130776000  | -0.987794000 | -1.259670000 |
| 7 | -1.039712000 | -0.390016000 | -1.373521000 |
| 6 | -1.732326000 | -0.761626000 | -0.299318000 |
| 7 | 2.109320000  | 0.568228000  | 0.549689000  |
| 6 | 1.541172000  | 1.380658000  | -0.342996000 |
| 6 | 1.292244000  | 0.498141000  | 1.653296000  |
| 6 | 0.221609000  | 1.299680000  | 1.414544000  |
| 7 | 0.398594000  | 1.848817000  | 0.162536000  |
| 1 | 1.907653000  | 1.580766000  | -1.334839000 |
| 6 | -0.570876000 | 2.677274000  | -0.548166000 |
| 1 | -0.141006000 | 2.976449000  | -1.501815000 |
| 1 | -1.481261000 | 2.100709000  | -0.734455000 |
| 1 | -0.793593000 | 3.563733000  | 0.046093000  |
| 6 | 3.343416000  | -0.217553000 | 0.356967000  |
| 1 | 4.168380000  | 0.343450000  | 0.808364000  |
| 1 | 3.185809000  | -1.135130000 | 0.924518000  |
| 6 | 3.590381000  | -0.533878000 | -1.097415000 |
| 1 | 3.827079000  | 0.358001000  | -1.684186000 |
| 1 | 2.718940000  | -1.032762000 | -1.526758000 |
| 1 | 4.446319000  | -1.205130000 | -1.175466000 |
| 7 | -3.027860000 | -0.215440000 | -0.007976000 |
| 8 | -3.358381000 | 0.799849000  | -0.630388000 |
| 8 | -3.700066000 | -0.762309000 | 0.856378000  |
| 8 | 1.085280000  | -2.278026000 | 0.393939000  |
| 1 | 1.515799000  | -0.155829000 | 2.478744000  |
| 1 | -0.662032000 | 1.495265000  | 1.999004000  |

[12] 1-ethyl-3-methylimidazolium tetrafluoroborate

X, Y, Z Cartesian coordinates (coordinates in Å and energy in au.)

E(RM06L) = -769.323308133

|   |              |              |              |
|---|--------------|--------------|--------------|
| 7 | -1.465430000 | -0.338878000 | 0.103410000  |
| 6 | -0.645816000 | 0.452365000  | -0.585606000 |
| 6 | -2.231178000 | 0.439875000  | 0.940500000  |
| 6 | -1.860914000 | 1.730332000  | 0.734406000  |
| 7 | -0.871268000 | 1.716363000  | -0.224667000 |
| 1 | 0.130158000  | 0.108866000  | -1.253208000 |
| 1 | -2.199891000 | 2.646828000  | 1.186251000  |
| 1 | -2.951282000 | 0.010446000  | 1.615889000  |

|   |              |              |              |
|---|--------------|--------------|--------------|
| 6 | -1.413415000 | -1.808344000 | 0.081375000  |
| 1 | -0.449400000 | -2.065847000 | -0.361145000 |
| 1 | -1.376430000 | -2.131320000 | 1.124161000  |
| 6 | -2.588120000 | -2.406384000 | -0.660542000 |
| 1 | -2.600744000 | -2.090540000 | -1.705879000 |
| 1 | -3.543709000 | -2.126591000 | -0.209116000 |
| 6 | -0.120281000 | 2.864140000  | -0.716484000 |
| 1 | -0.627405000 | 3.312885000  | -1.572164000 |
| 1 | -0.039357000 | 3.596896000  | 0.084425000  |
| 1 | 0.877138000  | 2.521303000  | -0.986492000 |
| 9 | 1.564274000  | -1.334891000 | -0.836924000 |
| 5 | 2.111459000  | -0.439541000 | 0.140190000  |
| 9 | 2.152053000  | 0.849586000  | -0.470039000 |
| 9 | 1.185368000  | -0.376631000 | 1.211792000  |
| 9 | 3.349150000  | -0.845230000 | 0.551363000  |
| 1 | -2.518744000 | -3.495032000 | -0.642497000 |

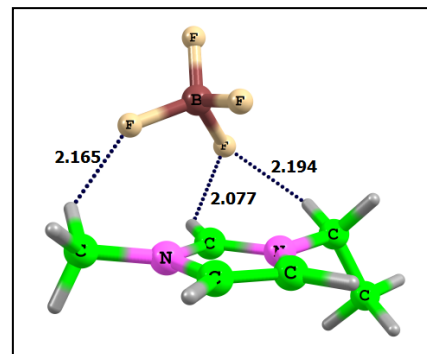

[13] 1-ethyl-3-methylimidazolium hexafluorophosphate

X, Y, Z Cartesian coordinates (coordinates in Å and energy in au.)

E(RM06L) = -1285.50299972

|    |              |              |              |
|----|--------------|--------------|--------------|
| 7  | -2.152681000 | 0.612514000  | -0.360375000 |
| 6  | -1.522947000 | -0.449846000 | -0.857192000 |
| 6  | -2.923348000 | 0.205909000  | 0.706546000  |
| 6  | -2.750524000 | -1.134454000 | 0.835034000  |
| 7  | -1.880518000 | -1.526850000 | -0.158150000 |
| 1  | -0.781008000 | -0.429965000 | -1.637491000 |
| 1  | -3.161888000 | -1.837477000 | 1.538620000  |
| 1  | -3.521372000 | 0.898022000  | 1.274059000  |
| 6  | -1.915693000 | 2.005370000  | -0.772684000 |
| 1  | -1.234776000 | 1.957400000  | -1.621989000 |
| 1  | -2.870291000 | 2.413576000  | -1.118675000 |
| 6  | -1.319076000 | 2.819176000  | 0.354409000  |
| 1  | -0.386898000 | 2.373109000  | 0.701538000  |
| 1  | -2.007489000 | 2.907727000  | 1.198625000  |
| 6  | -1.258408000 | -2.838714000 | -0.270018000 |
| 1  | -0.470938000 | -2.923984000 | 0.479213000  |
| 1  | -2.015739000 | -3.608337000 | -0.124883000 |
| 1  | -0.807864000 | -2.938298000 | -1.253810000 |
| 15 | 1.732267000  | 0.004970000  | 0.073514000  |
| 9  | 0.354268000  | -0.127185000 | 1.000072000  |
| 9  | 1.180370000  | -1.288421000 | -0.816259000 |
| 9  | 2.167597000  | 1.302236000  | 0.932539000  |
| 9  | 2.497463000  | -1.001296000 | 1.072322000  |
| 9  | 0.866710000  | 0.990385000  | -0.956089000 |
| 9  | 3.017140000  | 0.128952000  | -0.885989000 |
| 1  | -1.105319000 | 3.827357000  | -0.004171000 |

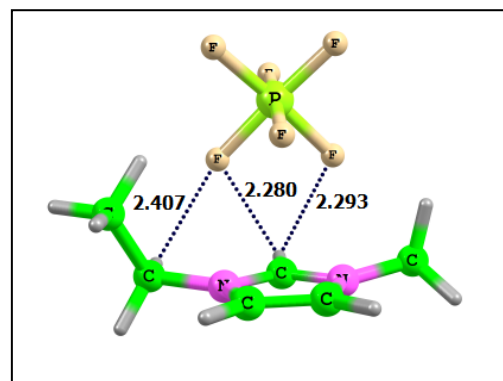

**Part-II : Thermochemical data from G3MP2 calculations**

X, Y, Z Cartesian coordinates (coordinates in Å and energy values in au.)

Compound name is followed by charge and spin multiplicity.

[1]Hydrazine

|   |              |              |              |  |
|---|--------------|--------------|--------------|--|
| 0 | 1            |              |              |  |
| 7 | 0.700121000  | -0.072981000 | -0.097619000 |  |
| 1 | 1.043856000  | 0.826450000  | -0.376492000 |  |
| 1 | 1.129779000  | -0.315676000 | 0.771276000  |  |
| 7 | -0.700117000 | -0.072919000 | 0.097661000  |  |
| 1 | -1.129800000 | -0.316155000 | -0.771073000 |  |
| 1 | -1.043863000 | 0.826677000  | 0.375995000  |  |

RHF

|                                          |                             |
|------------------------------------------|-----------------------------|
| Zero-point correction=                   | 0.051849 (Hartree/Particle) |
| Thermal correction to Energy=            | 0.061242                    |
| Thermal correction to Enthalpy=          | 0.062186                    |
| Thermal correction to Gibbs Free Energy= | 0.035542                    |

Sum of electronic and zero-point Energies= -111.111303  
 Sum of electronic and thermal Energies= -111.108132  
 Sum of electronic and thermal Enthalpies= -111.107187  
 Sum of electronic and thermal Free Energies= -111.133831

**G3MP2**

Temperature= 298.150000 Pressure= 1.000000  
 E(ZPE)= 0.058071 E(Thermal)= 0.055121  
 E(QCISD(T))= -111.528791 E(Empiric)= -0.064953  
 DE(MP2)= -0.157721  
 G3MP2(0 K)= -111.699616 G3MP2 Energy= -111.696344  
 G3MP2 Enthalpy= -111.695400 G3MP2 Free Energy= -111.722189

**[2] Monomethyl Hydrazine**

0 1  
 7 -1.153276000 -0.308383000 -0.046551000  
 1 -1.913828000 0.143776000 -0.511751000  
 1 -1.432826000 -0.507961000 0.897453000  
 7 -0.032813000 0.545686000 -0.095338000  
 6 1.192861000 -0.216071000 -0.006417000  
 1 2.033495000 0.469272000 -0.029369000  
 1 1.266589000 -0.822590000 0.898464000  
 1 1.257472000 -0.876632000 -0.860328000  
 1 -0.065445000 1.229440000 0.637260000

**RHF**

Zero-point correction= 0.078876 (Hartree/Particle)  
 Thermal correction to Energy= 0.092420  
 Thermal correction to Enthalpy= 0.093364  
 Thermal correction to Gibbs Free Energy= 0.063208  
 Sum of electronic and zero-point Energies= -150.111920  
 Sum of electronic and thermal Energies= -150.107841  
 Sum of electronic and thermal Enthalpies= -150.106897  
 Sum of electronic and thermal Free Energies= -150.137053

**G3MP2**

Temperature= 298.150000 Pressure= 1.000000  
 E(ZPE)= 0.088342 E(Thermal)= 0.083181  
 E(QCISD(T))= -150.705750 E(Empiric)= -0.092790  
 DE(MP2)= -0.205923  
 G3MP2(0 K)= -150.925587 G3MP2 Energy= -150.921282  
 G3MP2 Enthalpy= -150.920338 G3MP2 Free Energy= -150.950874

**[3] 1,2,3-triazine**

0 1  
 7 -1.204948000 -0.619599000 0.000000000  
 7 -0.130035000 -1.336591000 0.000000000  
 6 1.056998000 -0.755748000 0.000000000  
 6 1.191928000 0.612983000 0.000000000  
 6 0.000000000 1.299152000 0.000000000  
 7 -1.163283000 0.671612000 0.000000000  
 1 1.899717000 -1.421271000 0.000000000  
 1 2.146241000 1.103259000 0.000000000  
 1 -0.051648000 2.371736000 0.000000000

**RHF**

Zero-point correction= 0.069282 (Hartree/Particle)  
 Thermal correction to Energy= 0.073173  
 Thermal correction to Enthalpy= 0.074117  
 Thermal correction to Gibbs Free Energy= 0.042109  
 Sum of electronic and zero-point Energies= -278.542049  
 Sum of electronic and thermal Energies= -278.538158  
 Sum of electronic and thermal Enthalpies= -278.537214  
 Sum of electronic and thermal Free Energies= -278.569222

**G3MP2**

Temperature= 298.150000 Pressure= 1.000000  
 E(ZPE)= 0.061859 E(Thermal)= 0.066060  
 E(QCISD(T))= -279.531954 E(Empiric)= -0.139185  
 DE(MP2)= -0.276400  
 G3MP2(0 K)= -279.885680 G3MP2 Energy= -279.881479

G3MP2 Enthalpy= -279.880534 G3MP2 Free Energy= -279.912990

**[4]1,2,4-triazine**

|   |              |              |             |  |
|---|--------------|--------------|-------------|--|
| 0 | 1            |              |             |  |
| 7 | -1.204901000 | -0.629080000 | 0.000000000 |  |
| 6 | -0.081423000 | -1.294682000 | 0.000000000 |  |
| 6 | 1.144788000  | -0.627731000 | 0.000000000 |  |
| 7 | 1.187161000  | 0.675028000  | 0.000000000 |  |
| 6 | 0.000000000  | 1.272596000  | 0.000000000 |  |
| 7 | -1.166958000 | 0.680554000  | 0.000000000 |  |
| 1 | 2.075609000  | -1.166126000 | 0.000000000 |  |
| 1 | -0.149611000 | -2.365787000 | 0.000000000 |  |
| 1 | -0.013296000 | 2.345305000  | 0.000000000 |  |

**RHF**

|                                              |                             |
|----------------------------------------------|-----------------------------|
| Zero-point correction=                       | 0.069998 (Hartree/Particle) |
| Thermal correction to Energy=                | 0.073848                    |
| Thermal correction to Enthalpy=              | 0.074793                    |
| Thermal correction to Gibbs Free Energy=     | 0.042853                    |
| Sum of electronic and zero-point Energies=   | -278.572025                 |
| Sum of electronic and thermal Energies=      | -278.568175                 |
| Sum of electronic and thermal Enthalpies=    | -278.567231                 |
| Sum of electronic and thermal Free Energies= | -278.599170                 |

**G3MP2**

|                 |             |                    |             |
|-----------------|-------------|--------------------|-------------|
| Temperature=    | 298.150000  | Pressure=          | 1.000000    |
| E(ZPE)=         | 0.062498    | E(Thermal)=        | 0.066650    |
| E(QCISD(T))=    | -279.557214 | E(Empiric)=        | -0.139185   |
| DE(MP2)=        | -0.276991   |                    |             |
| G3MP2(0 K)=     | -279.910892 | G3MP2 Energy=      | -279.906740 |
| G3MP2 Enthalpy= | -279.905796 | G3MP2 Free Energy= | -279.938169 |

**[5]1,2,5-triazine**

|   |              |              |             |  |
|---|--------------|--------------|-------------|--|
| 0 | 1            |              |             |  |
| 6 | 1.108164000  | -0.640290000 | 0.000000000 |  |
| 7 | -0.000081000 | -1.352932000 | 0.000000000 |  |
| 6 | -1.107727000 | -0.639180000 | 0.000000000 |  |
| 7 | -1.172808000 | 0.677258000  | 0.000000000 |  |
| 6 | 0.000000000  | 1.278559000  | 0.000000000 |  |
| 7 | 1.172486000  | 0.676414000  | 0.000000000 |  |
| 1 | -2.038928000 | -1.175965000 | 0.000000000 |  |
| 1 | -0.000017000 | 2.353200000  | 0.000000000 |  |
| 1 | 2.039149000  | -1.176956000 | 0.000000000 |  |

**RHF**

|                                              |                             |
|----------------------------------------------|-----------------------------|
| Zero-point correction=                       | 0.071190 (Hartree/Particle) |
| Thermal correction to Energy=                | 0.075026                    |
| Thermal correction to Enthalpy=              | 0.075970                    |
| Thermal correction to Gibbs Free Energy=     | 0.044051                    |
| Sum of electronic and zero-point Energies=   | -278.624651                 |
| Sum of electronic and thermal Energies=      | -278.620815                 |
| Sum of electronic and thermal Enthalpies=    | -278.619871                 |
| Sum of electronic and thermal Free Energies= | -278.651791                 |

**G3MP2**

|                 |             |                    |             |
|-----------------|-------------|--------------------|-------------|
| Temperature=    | 298.150000  | Pressure=          | 1.000000    |
| E(ZPE)=         | 0.063562    | E(Thermal)=        | 0.067683    |
| E(QCISD(T))=    | -279.600194 | E(Empiric)=        | -0.139185   |
| DE(MP2)=        | -0.277301   |                    |             |
| G3MP2(0 K)=     | -279.953117 | G3MP2 Energy=      | -279.948996 |
| G3MP2 Enthalpy= | -279.948052 | G3MP2 Free Energy= | -279.980386 |

**[6] [BMIm]<sup>+</sup>[dc]<sup>-</sup>**

|   |              |              |              |  |
|---|--------------|--------------|--------------|--|
| 0 | 1            |              |              |  |
| 7 | -0.212458000 | -0.566928000 | 0.182860000  |  |
| 6 | 0.616846000  | -1.236930000 | -0.582762000 |  |
| 6 | 0.200548000  | -0.713673000 | 1.491010000  |  |
| 6 | 1.275880000  | -1.510465000 | 1.475123000  |  |
| 7 | 1.516166000  | -1.844461000 | 0.156250000  |  |
| 1 | 0.589967000  | -1.257880000 | -1.648586000 |  |

|   |              |              |              |
|---|--------------|--------------|--------------|
| 1 | 1.902775000  | -1.855532000 | 2.266981000  |
| 1 | -0.282521000 | -0.201588000 | 2.292154000  |
| 6 | -1.337975000 | 0.260886000  | -0.276214000 |
| 1 | -1.260276000 | 1.201169000  | 0.248120000  |
| 1 | -1.171580000 | 0.455407000  | -1.327342000 |
| 6 | -2.683189000 | -0.421002000 | -0.047303000 |
| 1 | -2.800902000 | -0.641491000 | 1.010643000  |
| 1 | -2.701329000 | -1.374585000 | -0.570070000 |
| 6 | 2.707943000  | -2.515070000 | -0.353801000 |
| 1 | 2.989794000  | -3.293754000 | 0.339285000  |
| 1 | 2.480149000  | -2.956069000 | -1.312018000 |
| 1 | 3.498434000  | -1.790627000 | -0.472913000 |
| 7 | 2.365306000  | 2.522423000  | -0.259212000 |
| 6 | 1.373162000  | 2.522760000  | 0.598659000  |
| 7 | 0.510107000  | 2.546194000  | 1.358465000  |
| 6 | 2.477532000  | 1.450720000  | -0.994634000 |
| 7 | 2.602359000  | 0.514585000  | -1.655822000 |
| 6 | -3.845265000 | 0.455273000  | -0.520123000 |
| 1 | -3.723045000 | 0.678107000  | -1.577527000 |
| 1 | -3.811347000 | 1.408408000  | 0.000659000  |
| 6 | -5.205262000 | -0.202995000 | -0.293395000 |
| 1 | -6.008656000 | 0.439196000  | -0.637819000 |
| 1 | -5.280965000 | -1.144842000 | -0.829051000 |
| 1 | -5.372179000 | -0.405631000 | 0.760330000  |

**RHF**

|                                              |  |                             |
|----------------------------------------------|--|-----------------------------|
| Zero-point correction=                       |  | 0.267408 (Hartree/Particle) |
| Thermal correction to Energy=                |  | 0.283809                    |
| Thermal correction to Enthalpy=              |  | 0.284753                    |
| Thermal correction to Gibbs Free Energy=     |  | 0.219827                    |
| Sum of electronic and zero-point Energies=   |  | -659.341885                 |
| Sum of electronic and thermal Energies=      |  | -659.325484                 |
| Sum of electronic and thermal Enthalpies=    |  | -659.324540                 |
| Sum of electronic and thermal Free Energies= |  | -659.389466                 |

**G3MP2**

|                 |             |                    |             |
|-----------------|-------------|--------------------|-------------|
| Temperature=    | 298.150000  | Pressure=          | 1.000000    |
| E (ZPE)=        | 0.238758    | E (Thermal)=       | 0.256314    |
| E (QCISD(T))=   | -661.869688 | E (Empiric)=       | -0.371160   |
| DE (MP2)=       | -0.731667   |                    |             |
| G3MP2(0 K)=     | -662.733758 | G3MP2 Energy=      | -662.716201 |
| G3MP2 Enthalpy= | -662.715257 | G3MP2 Free Energy= | -662.782940 |

**[7] [EMIm]<sup>+</sup>[dc]<sup>-</sup>**

|   |              |              |              |
|---|--------------|--------------|--------------|
| 0 | 1            |              |              |
| 7 | 1.155713000  | -0.014794000 | -0.074586000 |
| 6 | 0.620639000  | 1.031766000  | -0.659298000 |
| 6 | 1.104473000  | 0.184817000  | 1.289621000  |
| 6 | 0.552315000  | 1.387580000  | 1.488786000  |
| 7 | 0.265483000  | 1.915352000  | 0.244565000  |
| 1 | 0.462041000  | 1.137103000  | -1.708522000 |
| 1 | 0.317738000  | 1.909242000  | 2.389885000  |
| 1 | 1.422738000  | -0.564539000 | 1.978581000  |
| 6 | 1.648924000  | -1.225844000 | -0.748761000 |
| 1 | 1.221885000  | -2.065044000 | -0.222253000 |
| 1 | 1.232650000  | -1.216082000 | -1.746419000 |
| 6 | 3.169862000  | -1.276700000 | -0.785066000 |
| 1 | 3.588532000  | -1.286500000 | 0.215187000  |
| 1 | 3.582946000  | -0.428981000 | -1.321239000 |
| 6 | -0.531284000 | 3.110335000  | -0.015816000 |
| 1 | -0.259178000 | 3.870867000  | 0.700989000  |
| 1 | -0.317042000 | 3.464716000  | -1.012095000 |
| 1 | -1.578485000 | 2.861207000  | 0.054959000  |
| 7 | -2.635907000 | -1.449420000 | -0.051798000 |
| 6 | -1.637928000 | -1.997961000 | 0.599011000  |
| 7 | -0.778341000 | -2.495984000 | 1.178483000  |
| 6 | -2.339221000 | -0.388876000 | -0.751221000 |
| 7 | -2.105021000 | 0.552210000  | -1.374643000 |
| 1 | 3.485997000  | -2.184250000 | -1.286757000 |

**RHF**

|                        |  |                             |
|------------------------|--|-----------------------------|
| Zero-point correction= |  | 0.206372 (Hartree/Particle) |
|------------------------|--|-----------------------------|

|                                              |  |             |
|----------------------------------------------|--|-------------|
| Thermal correction to Energy=                |  | 0.220154    |
| Thermal correction to Enthalpy=              |  | 0.221098    |
| Thermal correction to Gibbs Free Energy=     |  | 0.162960    |
| Sum of electronic and zero-point Energies=   |  | -581.332883 |
| Sum of electronic and thermal Energies=      |  | -581.319101 |
| Sum of electronic and thermal Enthalpies=    |  | -581.318157 |
| Sum of electronic and thermal Free Energies= |  | -581.376295 |

### G3MP2

|                 |             |                    |             |
|-----------------|-------------|--------------------|-------------|
| Temperature=    | 298.150000  | Pressure=          | 1.000000    |
| E(ZPE)=         | 0.184261    | E(Thermal)=        | 0.198991    |
| E(QCISD(T))=    | -583.505289 | E(Empiric)=        | -0.315486   |
| DE(MP2)=        | -0.627610   |                    |             |
| G3MP2(0 K)=     | -584.264124 | G3MP2 Energy=      | -584.249393 |
| G3MP2 Enthalpy= | -584.248449 | G3MP2 Free Energy= | -584.308830 |

### [8]Pyridine

|   |             |              |              |
|---|-------------|--------------|--------------|
| 0 | 1           |              |              |
| 6 | 0.000000000 | 0.000000000  | -1.372256000 |
| 6 | 0.000000000 | 1.190250000  | -0.666091000 |
| 6 | 0.000000000 | 1.131017000  | 0.717390000  |
| 7 | 0.000000000 | 0.000000000  | 1.400419000  |
| 6 | 0.000000000 | -1.131017000 | 0.717390000  |
| 6 | 0.000000000 | -1.190250000 | -0.666091000 |
| 1 | 0.000000000 | 0.000000000  | -2.447440000 |
| 1 | 0.000000000 | 2.139831000  | -1.167910000 |
| 1 | 0.000000000 | 2.036082000  | 1.299140000  |
| 1 | 0.000000000 | -2.036082000 | 1.299140000  |
| 1 | 0.000000000 | -2.139831000 | -1.167910000 |

### RHF

|                                              |  |                             |
|----------------------------------------------|--|-----------------------------|
| Zero-point correction=                       |  | 0.095448 (Hartree/Particle) |
| Thermal correction to Energy=                |  | 0.099443                    |
| Thermal correction to Enthalpy=              |  | 0.100387                    |
| Thermal correction to Gibbs Free Energy=     |  | 0.068851                    |
| Sum of electronic and zero-point Energies=   |  | -246.600371                 |
| Sum of electronic and thermal Energies=      |  | -246.596376                 |
| Sum of electronic and thermal Enthalpies=    |  | -246.595432                 |
| Sum of electronic and thermal Free Energies= |  | -246.626968                 |

### G3MP2

|                 |             |                    |             |
|-----------------|-------------|--------------------|-------------|
| Temperature=    | 298.150000  | Pressure=          | 1.000000    |
| E(ZPE)=         | 0.085222    | E(Thermal)=        | 0.089584    |
| E(QCISD(T))=    | -247.551220 | E(Empiric)=        | -0.139185   |
| DE(MP2)=        | -0.262421   |                    |             |
| G3MP2(0 K)=     | -247.867605 | G3MP2 Energy=      | -247.863242 |
| G3MP2 Enthalpy= | -247.862298 | G3MP2 Free Energy= | -247.894354 |

### [9]Pyridazine

|   |             |              |              |
|---|-------------|--------------|--------------|
| 0 | 1           |              |              |
| 7 | 0.000000000 | 0.654647000  | -1.210650000 |
| 6 | 0.000000000 | 1.310141000  | -0.075994000 |
| 6 | 0.000000000 | 0.683743000  | 1.169334000  |
| 6 | 0.000000000 | -0.683743000 | 1.169334000  |
| 6 | 0.000000000 | -1.310141000 | -0.075994000 |
| 7 | 0.000000000 | -0.654647000 | -1.210650000 |
| 1 | 0.000000000 | 1.260314000  | 2.075767000  |
| 1 | 0.000000000 | 2.381131000  | -0.161264000 |
| 1 | 0.000000000 | -1.260314000 | 2.075767000  |
| 1 | 0.000000000 | -2.381131000 | -0.161264000 |

### RHF

|                                              |  |                             |
|----------------------------------------------|--|-----------------------------|
| Zero-point correction=                       |  | 0.082398 (Hartree/Particle) |
| Thermal correction to Energy=                |  | 0.086330                    |
| Thermal correction to Enthalpy=              |  | 0.087274                    |
| Thermal correction to Gibbs Free Energy=     |  | 0.055845                    |
| Sum of electronic and zero-point Energies=   |  | -262.567630                 |
| Sum of electronic and thermal Energies=      |  | -262.563699                 |
| Sum of electronic and thermal Enthalpies=    |  | -262.562754                 |
| Sum of electronic and thermal Free Energies= |  | -262.594184                 |



**G3MP2**

|                 |             |                    |             |
|-----------------|-------------|--------------------|-------------|
| Temperature=    | 298.150000  | Pressure=          | 1.000000    |
| E(ZPE)=         | 0.073570    | E(Thermal)=        | 0.077841    |
| E(QCISD(T))=    | -263.538386 | E(Empiric)=        | -0.139185   |
| DE(MP2)=        | -0.269196   |                    |             |
| G3MP2(0 K)=     | -263.873197 | G3MP2 Energy=      | -263.868926 |
| G3MP2 Enthalpy= | -263.867982 | G3MP2 Free Energy= | -263.899893 |

**[10]Pyrazine**

|     |             |              |              |
|-----|-------------|--------------|--------------|
| 0 1 |             |              |              |
| 6   | 0.000000000 | 1.121676000  | 0.693093000  |
| 6   | 0.000000000 | 1.121676000  | -0.693093000 |
| 7   | 0.000000000 | 0.000000000  | -1.386548000 |
| 6   | 0.000000000 | -1.121676000 | -0.693093000 |
| 6   | 0.000000000 | -1.121676000 | 0.693093000  |
| 7   | 0.000000000 | 0.000000000  | 1.386548000  |
| 1   | 0.000000000 | 2.043894000  | 1.245371000  |
| 1   | 0.000000000 | 2.043894000  | -1.245371000 |
| 1   | 0.000000000 | -2.043894000 | -1.245371000 |
| 1   | 0.000000000 | -2.043894000 | 1.245371000  |

**RHF**

|                                              |                             |
|----------------------------------------------|-----------------------------|
| Zero-point correction=                       | 0.082940 (Hartree/Particle) |
| Thermal correction to Energy=                | 0.086830                    |
| Thermal correction to Enthalpy=              | 0.087774                    |
| Thermal correction to Gibbs Free Energy=     | 0.057073                    |
| Sum of electronic and zero-point Energies=   | -262.600064                 |
| Sum of electronic and thermal Energies=      | -262.596175                 |
| Sum of electronic and thermal Enthalpies=    | -262.595231                 |
| Sum of electronic and thermal Free Energies= | -262.625932                 |

**G3MP2**

|                 |             |                    |             |
|-----------------|-------------|--------------------|-------------|
| Temperature=    | 298.150000  | Pressure=          | 1.000000    |
| E(ZPE)=         | 0.074054    | E(Thermal)=        | 0.078275    |
| E(QCISD(T))=    | -263.567114 | E(Empiric)=        | -0.139185   |
| DE(MP2)=        | -0.269710   |                    |             |
| G3MP2(0 K)=     | -263.901955 | G3MP2 Energy=      | -263.897734 |
| G3MP2 Enthalpy= | -263.896790 | G3MP2 Free Energy= | -263.927961 |

**[11] HIm Cation**

|      |              |              |              |
|------|--------------|--------------|--------------|
| +1 1 |              |              |              |
| 7    | 1.062086000  | -0.351834000 | 0.000011000  |
| 6    | -0.000020000 | -1.123816000 | -0.000036000 |
| 6    | 0.669956000  | 0.972905000  | -0.000008000 |
| 6    | -0.669920000 | 0.972930000  | 0.000088000  |
| 7    | -1.062099000 | -0.351796000 | -0.000048000 |
| 1    | -0.000040000 | -2.193081000 | -0.000072000 |
| 1    | -1.374685000 | 1.774775000  | 0.000154000  |
| 1    | 1.374750000  | 1.774725000  | -0.000010000 |
| 1    | -2.005829000 | -0.681526000 | -0.000085000 |
| 1    | 2.005804000  | -0.681598000 | 0.000005000  |

**RHF**

|                                              |                             |
|----------------------------------------------|-----------------------------|
| Zero-point correction=                       | 0.091931 (Hartree/Particle) |
| Thermal correction to Energy=                | 0.095479                    |
| Thermal correction to Enthalpy=              | 0.096423                    |
| Thermal correction to Gibbs Free Energy=     | 0.065698                    |
| Sum of electronic and zero-point Energies=   | -225.104421                 |
| Sum of electronic and thermal Energies=      | -225.100873                 |
| Sum of electronic and thermal Enthalpies=    | -225.099929                 |
| Sum of electronic and thermal Free Energies= | -225.130654                 |

**G3MP2**

|                 |             |                    |             |
|-----------------|-------------|--------------------|-------------|
| Temperature=    | 298.150000  | Pressure=          | 1.000000    |
| E(ZPE)=         | 0.082081    | E(Thermal)=        | 0.085925    |
| E(QCISD(T))=    | -225.948012 | E(Empiric)=        | -0.120627   |
| DE(MP2)=        | -0.238751   |                    |             |
| G3MP2(0 K)=     | -226.225309 | G3MP2 Energy=      | -226.221465 |
| G3MP2 Enthalpy= | -226.220521 | G3MP2 Free Energy= | -226.251639 |

**[12] tetrazolate anion**

|      |  |  |  |
|------|--|--|--|
| -1 1 |  |  |  |
|------|--|--|--|

|   |              |              |             |
|---|--------------|--------------|-------------|
| 7 | 0.641597000  | -0.922106000 | 0.000000000 |
| 7 | 1.094555000  | 0.319671000  | 0.000000000 |
| 7 | -0.641597000 | -0.922108000 | 0.000000000 |
| 7 | -1.094554000 | 0.319670000  | 0.000000000 |
| 6 | 0.000000000  | 1.051511000  | 0.000000000 |
| 1 | 0.000000000  | 2.125049000  | 0.000000000 |

**RHF**

|                                              |                             |
|----------------------------------------------|-----------------------------|
| Zero-point correction=                       | 0.037898 (Hartree/Particle) |
| Thermal correction to Energy=                | 0.041014                    |
| Thermal correction to Enthalpy=              | 0.041958                    |
| Thermal correction to Gibbs Free Energy=     | 0.012046                    |
| Sum of electronic and zero-point Energies=   | -256.163326                 |
| Sum of electronic and thermal Energies=      | -256.160210                 |
| Sum of electronic and thermal Enthalpies=    | -256.159266                 |
| Sum of electronic and thermal Free Energies= | -256.189178                 |

**G3MP2**

|                 |             |                    |             |
|-----------------|-------------|--------------------|-------------|
| Temperature=    | 298.150000  | Pressure=          | 1.000000    |
| E(ZPE)=         | 0.033837    | E(Thermal)=        | 0.037097    |
| E(QCISD(T))=    | -257.030510 | E(Empiric)=        | -0.120627   |
| DE(MP2)=        | -0.268490   |                    |             |
| G3MP2(0 K)=     | -257.385789 | G3MP2 Energy=      | -257.382530 |
| G3MP2 Enthalpy= | -257.381586 | G3MP2 Free Energy= | -257.411681 |

**[13]1,2,4-triazolium cation**

|      |              |              |             |
|------|--------------|--------------|-------------|
| +1 1 |              |              |             |
| 7    | -1.138984000 | 0.368478000  | 0.000000000 |
| 6    | -0.751883000 | -0.847773000 | 0.000000000 |
| 7    | 0.000000000  | 1.087534000  | 0.000000000 |
| 6    | 1.057221000  | 0.332475000  | 0.000000000 |
| 7    | 0.616739000  | -0.913944000 | 0.000000000 |
| 1    | -1.391576000 | -1.703954000 | 0.000000000 |
| 1    | 2.077863000  | 0.654066000  | 0.000000000 |
| 1    | 1.181377000  | -1.740390000 | 0.000000000 |
| 1    | -0.043979000 | 2.087587000  | 0.000000000 |

**RHF**

|                                              |                             |
|----------------------------------------------|-----------------------------|
| Zero-point correction=                       | 0.079534 (Hartree/Particle) |
| Thermal correction to Energy=                | 0.082956                    |
| Thermal correction to Enthalpy=              | 0.083900                    |
| Thermal correction to Gibbs Free Energy=     | 0.053390                    |
| Sum of electronic and zero-point Energies=   | -241.082426                 |
| Sum of electronic and thermal Energies=      | -241.079005                 |
| Sum of electronic and thermal Enthalpies=    | -241.078061                 |
| Sum of electronic and thermal Free Energies= | -241.108571                 |

**G3MP2**

|                 |             |                    |             |
|-----------------|-------------|--------------------|-------------|
| Temperature=    | 298.150000  | Pressure=          | 1.000000    |
| E(ZPE)=         | 0.071013    | E(Thermal)=        | 0.074685    |
| E(QCISD(T))=    | -241.943081 | E(Empiric)=        | -0.120627   |
| DE(MP2)=        | -0.246668   |                    |             |
| G3MP2(0 K)=     | -242.239363 | G3MP2 Energy=      | -242.235691 |
| G3MP2 Enthalpy= | -242.234747 | G3MP2 Free Energy= | -242.265588 |

**[14]EMImdc**

|     |             |              |              |
|-----|-------------|--------------|--------------|
| 0 1 |             |              |              |
| 7   | 1.155713000 | -0.014794000 | -0.074586000 |
| 6   | 0.620639000 | 1.031766000  | -0.659298000 |
| 6   | 1.104473000 | 0.184817000  | 1.289621000  |
| 6   | 0.552315000 | 1.387580000  | 1.488786000  |
| 7   | 0.265483000 | 1.915352000  | 0.244565000  |
| 1   | 0.462041000 | 1.137103000  | -1.708522000 |
| 1   | 0.317738000 | 1.909242000  | 2.389885000  |
| 1   | 1.422738000 | -0.564539000 | 1.978581000  |
| 6   | 1.648924000 | -1.225844000 | -0.748761000 |
| 1   | 1.221885000 | -2.065044000 | -0.222253000 |
| 1   | 1.232650000 | -1.216082000 | -1.746419000 |
| 6   | 3.169862000 | -1.276700000 | -0.785066000 |
| 1   | 3.588532000 | -1.286500000 | 0.215187000  |

|   |              |              |              |
|---|--------------|--------------|--------------|
| 1 | 3.582946000  | -0.428981000 | -1.321239000 |
| 6 | -0.531284000 | 3.110335000  | -0.015816000 |
| 1 | -0.259178000 | 3.870867000  | 0.700989000  |
| 1 | -0.317042000 | 3.464716000  | -1.012095000 |
| 1 | -1.578485000 | 2.861207000  | 0.054959000  |
| 7 | -2.635907000 | -1.449420000 | -0.051798000 |
| 6 | -1.637928000 | -1.997961000 | 0.599011000  |
| 7 | -0.778341000 | -2.495984000 | 1.178483000  |
| 6 | -2.339221000 | -0.388876000 | -0.751221000 |
| 7 | -2.105021000 | 0.552210000  | -1.374643000 |
| 1 | 3.485997000  | -2.184250000 | -1.286757000 |

#### RHF

|                                              |                             |
|----------------------------------------------|-----------------------------|
| Zero-point correction=                       | 0.206860 (Hartree/Particle) |
| Thermal correction to Energy=                | 0.220425                    |
| Thermal correction to Enthalpy=              | 0.221369                    |
| Thermal correction to Gibbs Free Energy=     | 0.163710                    |
| Sum of electronic and zero-point Energies=   | -581.333480                 |
| Sum of electronic and thermal Energies=      | -581.319915                 |
| Sum of electronic and thermal Enthalpies=    | -581.318971                 |
| Sum of electronic and thermal Free Energies= | -581.376630                 |

#### G3MP2

|                 |             |                    |             |
|-----------------|-------------|--------------------|-------------|
| Temperature=    | 298.150000  | Pressure=          | 1.000000    |
| E (ZPE)=        | 0.184696    | E (Thermal)=       | 0.199219    |
| E (QCISD (T))=  | -583.506440 | E (Empiric)=       | -0.315486   |
| DE (MP2)=       | -0.627599   |                    |             |
| G3MP2 (0 K)=    | -584.264828 | G3MP2 Energy=      | -584.250306 |
| G3MP2 Enthalpy= | -584.249362 | G3MP2 Free Energy= | -584.309248 |

#### [15]EMIm-trz

##### 0 1

|   |              |              |              |
|---|--------------|--------------|--------------|
| 6 | 2.705726000  | -0.024344000 | -0.842461000 |
| 7 | 2.746469000  | 0.788371000  | 0.217891000  |
| 7 | 2.096881000  | -1.168794000 | -0.624866000 |
| 7 | 1.721718000  | -1.135238000 | 0.674136000  |
| 6 | 2.131558000  | 0.025314000  | 1.127042000  |
| 1 | 1.981449000  | 0.331053000  | 2.145765000  |
| 7 | -0.973613000 | 1.636384000  | -0.078945000 |
| 6 | -0.526397000 | 0.460093000  | -0.466858000 |
| 6 | -2.299916000 | 1.496196000  | 0.278462000  |
| 6 | -2.621773000 | 0.209862000  | 0.088851000  |
| 7 | -1.493194000 | -0.426181000 | -0.385973000 |
| 1 | 0.462029000  | 0.247243000  | -0.817182000 |
| 6 | -0.172545000 | 2.857278000  | -0.005167000 |
| 1 | -0.446388000 | 3.525917000  | -0.809793000 |
| 1 | -0.354555000 | 3.336271000  | 0.946026000  |
| 1 | 0.870255000  | 2.585562000  | -0.071846000 |
| 6 | -1.340585000 | -1.866233000 | -0.667434000 |
| 1 | -2.118709000 | -2.136092000 | -1.370345000 |
| 1 | -0.377740000 | -1.983216000 | -1.139725000 |
| 6 | -1.404837000 | -2.700302000 | 0.603580000  |
| 1 | -2.345988000 | -2.565829000 | 1.128494000  |
| 1 | -0.579170000 | -2.440044000 | 1.251220000  |
| 1 | -1.316990000 | -3.748419000 | 0.339501000  |
| 1 | 3.132403000  | 0.228580000  | -1.795015000 |
| 1 | -2.880629000 | 2.318812000  | 0.633544000  |
| 1 | -3.541168000 | -0.308814000 | 0.247560000  |

#### RHF

|                                              |                             |
|----------------------------------------------|-----------------------------|
| Zero-point correction=                       | 0.234876 (Hartree/Particle) |
| Thermal correction to Energy=                | 0.247220                    |
| Thermal correction to Enthalpy=              | 0.248164                    |
| Thermal correction to Gibbs Free Energy=     | 0.194677                    |
| Sum of electronic and zero-point Energies=   | -582.448750                 |
| Sum of electronic and thermal Energies=      | -582.436405                 |
| Sum of electronic and thermal Enthalpies=    | -582.435461                 |
| Sum of electronic and thermal Free Energies= | -582.488948                 |

#### G3MP2

|                 |             |                    |             |
|-----------------|-------------|--------------------|-------------|
| Temperature=    | 298.150000  | Pressure=          | 1.000000    |
| E (ZPE)=        | 0.209711    | E(Thermal)=        | 0.223020    |
| E(QCISD(T))=    | -584.686217 | E(Empiric)=        | -0.324765   |
| DE (MP2)=       | -0.647033   |                    |             |
| G3MP2(0 K)=     | -585.448305 | G3MP2 Energy=      | -585.434995 |
| G3MP2 Enthalpy= | -585.434051 | G3MP2 Free Energy= | -585.489635 |

**[16]EMIM-dtrz**

0 1

|   |              |              |              |
|---|--------------|--------------|--------------|
| 6 | 2.382504000  | -0.737001000 | 0.052467000  |
| 7 | 2.978064000  | 0.433469000  | -0.018038000 |
| 7 | 1.070383000  | -0.708146000 | 0.047567000  |
| 7 | 0.760696000  | 0.572423000  | -0.032009000 |
| 6 | 1.912623000  | 1.200491000  | -0.068311000 |
| 7 | -2.509010000 | -1.783592000 | -0.084740000 |
| 6 | -2.068027000 | -0.544673000 | -0.084736000 |
| 6 | -3.880505000 | -1.750569000 | -0.227970000 |
| 6 | -4.237293000 | -0.460542000 | -0.311687000 |
| 7 | -3.080011000 | 0.284571000  | -0.220480000 |
| 1 | -1.046747000 | -0.239275000 | 0.001544000  |
| 6 | -1.669089000 | -2.980026000 | 0.036513000  |
| 1 | -1.944087000 | -3.518158000 | 0.932270000  |
| 1 | -1.819763000 | -3.606583000 | -0.830679000 |
| 1 | -0.636357000 | -2.671604000 | 0.091512000  |
| 6 | -2.955430000 | 1.752979000  | -0.254055000 |
| 1 | -1.906083000 | 1.970913000  | -0.390142000 |
| 1 | -3.490840000 | 2.100274000  | -1.127388000 |
| 6 | -3.484514000 | 2.399182000  | 1.018334000  |
| 1 | -2.932464000 | 2.053349000  | 1.884094000  |
| 1 | -4.537599000 | 2.187199000  | 1.170167000  |
| 1 | -3.363561000 | 3.473689000  | 0.947690000  |
| 1 | -4.467946000 | -2.641699000 | -0.260609000 |
| 1 | -5.197319000 | -0.009176000 | -0.432197000 |
| 7 | 3.095266000  | -1.989359000 | 0.129325000  |
| 8 | 2.433788000  | -2.987734000 | 0.176168000  |
| 8 | 4.282361000  | -1.952153000 | 0.140875000  |
| 7 | 1.966736000  | 2.639359000  | -0.159796000 |
| 8 | 3.035977000  | 3.155301000  | -0.170247000 |
| 8 | 0.918659000  | 3.219704000  | -0.219596000 |

**RHF**

|                                              |                             |
|----------------------------------------------|-----------------------------|
| Zero-point correction=                       | 0.241216 (Hartree/Particle) |
| Thermal correction to Energy=                | 0.258925                    |
| Thermal correction to Enthalpy=              | 0.259869                    |
| Thermal correction to Gibbs Free Energy=     | 0.188713                    |
| Sum of electronic and zero-point Energies=   | -989.399758                 |
| Sum of electronic and thermal Energies=      | -989.382049                 |
| Sum of electronic and thermal Enthalpies=    | -989.381105                 |
| Sum of electronic and thermal Free Energies= | -989.452262                 |

**G3MP2**

|                 |             |                    |             |
|-----------------|-------------|--------------------|-------------|
| Temperature=    | 298.150000  | Pressure=          | 1.000000    |
| E (ZPE)=        | 0.215372    | E(Thermal)=        | 0.234334    |
| E(QCISD(T))=    | -992.731454 | E(Empiric)=        | -0.473229   |
| DE (MP2)=       | -1.049864   |                    |             |
| G3MP2(0 K)=     | -994.039176 | G3MP2 Energy=      | -994.020214 |
| G3MP2 Enthalpy= | -994.019270 | G3MP2 Free Energy= | -994.093435 |

**[17]EMIM-dn**

0 1

|   |              |              |              |
|---|--------------|--------------|--------------|
| 7 | -2.039106000 | -0.283199000 | 0.020226000  |
| 6 | -1.286091000 | 0.460064000  | 0.801004000  |
| 6 | -2.461880000 | 0.499348000  | -1.034007000 |
| 6 | -1.942071000 | 1.720095000  | -0.849879000 |
| 7 | -1.213031000 | 1.678911000  | 0.316874000  |
| 1 | -2.015082000 | 2.607490000  | -1.438604000 |
| 1 | -3.085255000 | 0.115860000  | -1.810752000 |
| 6 | -2.299057000 | -1.722251000 | 0.195230000  |
| 1 | -1.941989000 | -1.983063000 | 1.178881000  |

|   |              |              |              |
|---|--------------|--------------|--------------|
| 1 | -3.372520000 | -1.858379000 | 0.169934000  |
| 6 | -1.595490000 | -2.560338000 | -0.863179000 |
| 1 | -0.524362000 | -2.424544000 | -0.804401000 |
| 1 | -1.934692000 | -2.308003000 | -1.862330000 |
| 6 | -0.350569000 | 2.746726000  | 0.824284000  |
| 1 | 0.528580000  | 2.808991000  | 0.203401000  |
| 1 | -0.905653000 | 3.673626000  | 0.815279000  |
| 1 | -0.055536000 | 2.502797000  | 1.830904000  |
| 1 | -1.820905000 | -3.606508000 | -0.688412000 |
| 1 | -0.781538000 | 0.113683000  | 1.675894000  |
| 7 | 1.913938000  | -1.086717000 | -0.197303000 |
| 7 | 2.345746000  | 0.049187000  | -0.870440000 |
| 8 | 1.538125000  | 0.897773000  | -1.145143000 |
| 8 | 3.465152000  | 0.037943000  | -1.255366000 |
| 7 | 1.407040000  | -0.789811000 | 0.954896000  |
| 8 | 1.549264000  | 0.303648000  | 1.480998000  |
| 8 | 0.774682000  | -1.674666000 | 1.509475000  |

RHF

|                                              |  |                             |
|----------------------------------------------|--|-----------------------------|
| Zero-point correction=                       |  | 0.216093 (Hartree/Particle) |
| Thermal correction to Energy=                |  | 0.231004                    |
| Thermal correction to Enthalpy=              |  | 0.231949                    |
| Thermal correction to Gibbs Free Energy=     |  | 0.170762                    |
| Sum of electronic and zero-point Energies=   |  | -804.772118                 |
| Sum of electronic and thermal Energies=      |  | -804.757207                 |
| Sum of electronic and thermal Enthalpies=    |  | -804.756263                 |
| Sum of electronic and thermal Free Energies= |  | -804.817449                 |

G3MP2

|                 |             |                    |             |
|-----------------|-------------|--------------------|-------------|
| Temperature=    | 298.150000  | Pressure=          | 1.000000    |
| E (ZPE)=        | 0.192940    | E (Thermal)=       | 0.208903    |
| E (QCISD (T))=  | -807.478986 | E (Empiric)=       | -0.389718   |
| DE (MP2)=       | -0.888131   |                    |             |
| G3MP2 (0 K)=    | -808.563895 | G3MP2 Energy=      | -808.547932 |
| G3MP2 Enthalpy= | -808.546988 | G3MP2 Free Energy= | -808.610653 |

[18]EMIM-tz

|     |              |              |              |
|-----|--------------|--------------|--------------|
| 0 1 |              |              |              |
| 7   | 2.485704000  | -0.225208000 | -0.964270000 |
| 7   | 2.553136000  | -0.982838000 | 0.115850000  |
| 7   | 2.171539000  | 0.978404000  | -0.633565000 |
| 7   | 2.021188000  | 1.061554000  | 0.673799000  |
| 6   | 2.271995000  | -0.158634000 | 1.105339000  |
| 1   | 2.253791000  | -0.444242000 | 2.137330000  |
| 7   | -1.461395000 | 0.529647000  | -0.362232000 |
| 6   | -0.590484000 | -0.446353000 | -0.490232000 |
| 6   | -2.614212000 | 0.007604000  | 0.186624000  |
| 6   | -2.404064000 | -1.302574000 | 0.374029000  |
| 7   | -1.121688000 | -1.570420000 | -0.057947000 |
| 1   | 0.395283000  | -0.345389000 | -0.896709000 |
| 1   | -3.038123000 | -2.063388000 | 0.772971000  |
| 1   | -3.469430000 | 0.612540000  | 0.392006000  |
| 6   | -0.438353000 | -2.864110000 | -0.028807000 |
| 1   | 0.620714000  | -2.692474000 | -0.147839000 |
| 1   | -0.619535000 | -3.330550000 | 0.928626000  |
| 1   | -0.814749000 | -3.495209000 | -0.821789000 |
| 6   | -1.201349000 | 1.945764000  | -0.684149000 |
| 1   | -0.273373000 | 1.969319000  | -1.233788000 |
| 1   | -2.003628000 | 2.275417000  | -1.331636000 |
| 6   | -1.092221000 | 2.801710000  | 0.569460000  |
| 1   | -0.245964000 | 2.483281000  | 1.162970000  |
| 1   | -1.997902000 | 2.758712000  | 1.166705000  |
| 1   | -0.934347000 | 3.833560000  | 0.276131000  |

RHF

|                                            |  |                             |
|--------------------------------------------|--|-----------------------------|
| Zero-point correction=                     |  | 0.222023 (Hartree/Particle) |
| Thermal correction to Energy=              |  | 0.234397                    |
| Thermal correction to Enthalpy=            |  | 0.235341                    |
| Thermal correction to Gibbs Free Energy=   |  | 0.181418                    |
| Sum of electronic and zero-point Energies= |  | -598.433170                 |

Sum of electronic and thermal Energies= -598.420797  
 Sum of electronic and thermal Enthalpies= -598.419853  
 Sum of electronic and thermal Free Energies= -598.473775

**G3MP2**

|                 |             |                    |             |
|-----------------|-------------|--------------------|-------------|
| Temperature=    | 298.150000  | Pressure=          | 1.000000    |
| E(ZPE)=         | 0.198235    | E(Thermal)=        | 0.211531    |
| E(QCISD(T))=    | -600.692961 | E(Empiric)=        | -0.324765   |
| DE(MP2)=        | -0.653225   |                    |             |
| G3MP2(0 K)=     | -601.472715 | G3MP2 Energy=      | -601.459419 |
| G3MP2 Enthalpy= | -601.458475 | G3MP2 Free Energy= | -601.514453 |

**[19]EMIm-mtz**

|   |              |              |              |
|---|--------------|--------------|--------------|
| 0 | 1            |              |              |
| 7 | -2.077280000 | -0.086565000 | -1.537175000 |
| 7 | -2.396192000 | 0.703180000  | -0.524827000 |
| 7 | -1.724044000 | -1.238186000 | -1.092934000 |
| 7 | -1.797182000 | -1.253594000 | 0.224760000  |
| 6 | -2.226163000 | -0.046949000 | 0.547768000  |
| 7 | 1.753933000  | -0.444721000 | -0.267394000 |
| 6 | 0.837392000  | 0.438172000  | -0.596156000 |
| 6 | 2.749305000  | 0.208073000  | 0.429640000  |
| 6 | 2.400276000  | 1.500066000  | 0.499244000  |
| 7 | 1.190951000  | 1.625968000  | -0.152389000 |
| 1 | -0.054097000 | 0.225985000  | -1.151403000 |
| 1 | 2.891231000  | 2.334707000  | 0.949094000  |
| 1 | 3.605812000  | -0.303728000 | 0.809121000  |
| 6 | 0.406211000  | 2.849951000  | -0.317901000 |
| 1 | -0.599902000 | 2.573948000  | -0.595472000 |
| 1 | 0.385415000  | 3.378614000  | 0.624008000  |
| 1 | 0.855340000  | 3.473109000  | -1.078690000 |
| 6 | 1.672960000  | -1.892013000 | -0.541856000 |
| 1 | 0.856383000  | -2.026689000 | -1.233839000 |
| 1 | 2.598194000  | -2.174000000 | -1.027682000 |
| 6 | 1.425894000  | -2.697362000 | 0.725590000  |
| 1 | 0.465497000  | -2.435752000 | 1.148690000  |
| 1 | 2.208393000  | -2.540460000 | 1.461767000  |
| 1 | 1.411657000  | -3.751761000 | 0.473041000  |
| 6 | -2.514450000 | 0.400584000  | 1.946182000  |
| 1 | -2.498771000 | 1.482566000  | 2.009767000  |
| 1 | -3.496427000 | 0.064497000  | 2.264540000  |
| 1 | -1.788584000 | -0.006734000 | 2.641701000  |

**RHF**

|                                              |                             |
|----------------------------------------------|-----------------------------|
| Zero-point correction=                       | 0.251394 (Hartree/Particle) |
| Thermal correction to Energy=                | 0.265487                    |
| Thermal correction to Enthalpy=              | 0.266432                    |
| Thermal correction to Gibbs Free Energy=     | 0.208222                    |
| Sum of electronic and zero-point Energies=   | -637.445249                 |
| Sum of electronic and thermal Energies=      | -637.431156                 |
| Sum of electronic and thermal Enthalpies=    | -637.430212                 |
| Sum of electronic and thermal Free Energies= | -637.488422                 |

**G3MP2**

|                 |             |                    |             |
|-----------------|-------------|--------------------|-------------|
| Temperature=    | 298.150000  | Pressure=          | 1.000000    |
| E(ZPE)=         | 0.224459    | E(Thermal)=        | 0.239600    |
| E(QCISD(T))=    | -639.881516 | E(Empiric)=        | -0.352602   |
| DE(MP2)=        | -0.704724   |                    |             |
| G3MP2(0 K)=     | -640.714383 | G3MP2 Energy=      | -640.699242 |
| G3MP2 Enthalpy= | -640.698298 | G3MP2 Free Energy= | -640.758890 |

**[20]EMIM-Cntz**

|   |              |              |              |
|---|--------------|--------------|--------------|
| 0 | 1            |              |              |
| 7 | -1.753565000 | -1.237344000 | -1.591624000 |
| 7 | -2.318517000 | -0.216123000 | -0.997621000 |
| 7 | -1.187417000 | -2.000836000 | -0.714110000 |
| 7 | -1.359605000 | -1.511211000 | 0.486534000  |
| 6 | -2.066551000 | -0.415678000 | 0.282461000  |
| 7 | 1.925580000  | -0.127649000 | -0.202395000 |

|   |              |              |              |
|---|--------------|--------------|--------------|
| 6 | 0.874630000  | 0.416218000  | -0.774046000 |
| 6 | 2.602297000  | 0.862800000  | 0.478099000  |
| 6 | 1.925819000  | 2.004096000  | 0.290341000  |
| 7 | 0.839796000  | 1.703570000  | -0.504132000 |
| 1 | 0.155773000  | -0.109726000 | -1.366453000 |
| 1 | 2.108279000  | 2.993519000  | 0.647640000  |
| 1 | 3.493513000  | 0.664335000  | 1.030815000  |
| 6 | -0.208623000 | 2.636369000  | -0.923057000 |
| 1 | -0.974769000 | 2.082814000  | -1.441830000 |
| 1 | -0.640902000 | 3.095146000  | -0.046264000 |
| 1 | 0.217850000  | 3.389138000  | -1.570542000 |
| 6 | 2.259880000  | -1.564577000 | -0.221508000 |
| 1 | 1.580962000  | -2.028422000 | -0.919690000 |
| 1 | 3.268724000  | -1.652328000 | -0.603227000 |
| 6 | 2.114451000  | -2.198868000 | 1.154515000  |
| 1 | 1.092723000  | -2.117627000 | 1.500089000  |
| 1 | 2.779481000  | -1.741924000 | 1.880225000  |
| 1 | 2.371103000  | -3.249744000 | 1.083231000  |
| 6 | -2.440820000 | 0.507631000  | 1.318376000  |
| 7 | -2.691878000 | 1.273432000  | 2.119765000  |

RHF

|                                              |                             |
|----------------------------------------------|-----------------------------|
| Zero-point correction=                       | 0.220398 (Hartree/Particle) |
| Thermal correction to Energy=                | 0.234526                    |
| Thermal correction to Enthalpy=              | 0.235470                    |
| Thermal correction to Gibbs Free Energy=     | 0.176628                    |
| Sum of electronic and zero-point Energies=   | -690.175513                 |
| Sum of electronic and thermal Energies=      | -690.161384                 |
| Sum of electronic and thermal Enthalpies=    | -690.160440                 |
| Sum of electronic and thermal Free Energies= | -690.219283                 |

G3MP2

|                 |             |                    |             |
|-----------------|-------------|--------------------|-------------|
| Temperature=    | 298.150000  | Pressure=          | 1.000000    |
| E(ZPE)=         | 0.196784    | E(Thermal)=        | 0.211959    |
| E(QCISD(T))=    | -692.720567 | E(Empiric)=        | -0.361881   |
| DE(MP2)=        | -0.724819   |                    |             |
| G3MP2(0 K)=     | -693.610484 | G3MP2 Energy=      | -693.595308 |
| G3MP2 Enthalpy= | -693.594364 | G3MP2 Free Energy= | -693.655592 |

[21]EMIM-NO<sub>2</sub>tz

|     |              |              |              |
|-----|--------------|--------------|--------------|
| 0 1 |              |              |              |
| 7   | -1.427740000 | -0.992339000 | -1.995803000 |
| 7   | -1.962857000 | -0.031161000 | -1.286475000 |
| 7   | -0.998752000 | -1.933293000 | -1.214179000 |
| 7   | -1.253378000 | -1.632001000 | 0.032267000  |
| 6   | -1.844270000 | -0.466060000 | -0.056246000 |
| 7   | 2.121544000  | -0.164699000 | -0.112691000 |
| 6   | 1.170467000  | 0.447821000  | -0.782879000 |
| 6   | 2.717450000  | 0.757666000  | 0.721107000  |
| 6   | 2.094300000  | 1.927938000  | 0.523718000  |
| 7   | 1.121410000  | 1.713493000  | -0.428189000 |
| 1   | 0.529038000  | -0.016085000 | -1.502141000 |
| 1   | 2.244309000  | 2.885234000  | 0.972024000  |
| 1   | 3.519374000  | 0.497149000  | 1.375415000  |
| 6   | 0.168448000  | 2.709244000  | -0.930213000 |
| 1   | -0.289319000 | 3.205190000  | -0.089139000 |
| 1   | 0.690423000  | 3.420084000  | -1.554918000 |
| 1   | -0.601105000 | 2.200132000  | -1.486876000 |
| 6   | 2.432192000  | -1.604756000 | -0.194240000 |
| 1   | 1.832689000  | -2.002750000 | -0.998274000 |
| 1   | 3.476806000  | -1.691362000 | -0.463277000 |
| 6   | 2.119487000  | -2.330022000 | 1.107131000  |
| 1   | 1.065801000  | -2.254892000 | 1.339836000  |
| 1   | 2.701461000  | -1.938799000 | 1.935185000  |
| 1   | 2.370410000  | -3.378199000 | 0.990593000  |
| 7   | -2.245913000 | 0.298858000  | 1.092903000  |
| 8   | -2.437850000 | -0.285659000 | 2.110957000  |
| 8   | -2.333216000 | 1.487072000  | 0.956101000  |

RHF

|                                              |  |                             |
|----------------------------------------------|--|-----------------------------|
| Zero-point correction=                       |  | 0.225238 (Hartree/Particle) |
| Thermal correction to Energy=                |  | 0.240138                    |
| Thermal correction to Enthalpy=              |  | 0.241082                    |
| Thermal correction to Gibbs Free Energy=     |  | 0.179746                    |
| Sum of electronic and zero-point Energies=   |  | -801.902142                 |
| Sum of electronic and thermal Energies=      |  | -801.887242                 |
| Sum of electronic and thermal Enthalpies=    |  | -801.886297                 |
| Sum of electronic and thermal Free Energies= |  | -801.947633                 |

**G3MP2**

|                 |             |                    |             |
|-----------------|-------------|--------------------|-------------|
| Temperature=    | 298.150000  | Pressure=          | 1.000000    |
| E(ZPE)=         | 0.201105    | E(Thermal)=        | 0.217088    |
| E(QCISD(T))=    | -804.713356 | E(Empiric)=        | -0.398997   |
| DE(MP2)=        | -0.857593   |                    |             |
| G3MP2(0 K)=     | -805.768842 | G3MP2 Energy=      | -805.752858 |
| G3MP2 Enthalpy= | -805.751914 | G3MP2 Free Energy= | -805.815761 |

**[22]EMIm-NO<sub>2</sub>Otz**

0 1

|   |              |              |              |
|---|--------------|--------------|--------------|
| 7 | -1.125290000 | -1.515497000 | -0.265665000 |
| 7 | -1.406221000 | -0.253130000 | -0.194686000 |
| 7 | -2.148135000 | -2.284270000 | -0.113041000 |
| 7 | -3.184747000 | -1.506447000 | 0.071660000  |
| 6 | -2.706993000 | -0.300096000 | 0.016826000  |
| 7 | 2.969691000  | -0.057289000 | -0.220929000 |
| 6 | 1.761049000  | 0.452554000  | -0.330078000 |
| 6 | 3.841776000  | 0.960237000  | 0.101406000  |
| 6 | 3.120225000  | 2.087725000  | 0.173343000  |
| 7 | 1.811393000  | 1.747699000  | -0.099697000 |
| 1 | 0.890270000  | -0.136491000 | -0.545681000 |
| 6 | 0.667779000  | 2.663035000  | -0.127617000 |
| 1 | -0.238547000 | 2.088248000  | -0.226171000 |
| 1 | 0.640968000  | 3.219451000  | 0.797992000  |
| 1 | 0.771415000  | 3.342763000  | -0.961607000 |
| 6 | 3.289493000  | -1.490526000 | -0.353019000 |
| 1 | 2.574002000  | -1.908728000 | -1.042832000 |
| 1 | 4.275058000  | -1.547367000 | -0.795288000 |
| 6 | 3.223366000  | -2.213689000 | 0.984130000  |
| 1 | 2.209742000  | -2.200759000 | 1.362512000  |
| 1 | 3.890367000  | -1.765901000 | 1.713726000  |
| 1 | 3.517357000  | -3.247853000 | 0.844526000  |
| 7 | -3.490352000 | 0.892442000  | 0.172521000  |
| 8 | -4.657765000 | 0.770831000  | 0.346497000  |
| 8 | -2.900993000 | 1.936023000  | 0.116431000  |
| 8 | 0.059764000  | -1.937469000 | -0.465580000 |
| 1 | 4.886122000  | 0.789234000  | 0.243744000  |
| 1 | 3.410660000  | 3.092317000  | 0.389201000  |

**RHF**

|                                              |  |                             |
|----------------------------------------------|--|-----------------------------|
| Zero-point correction=                       |  | 0.229823 (Hartree/Particle) |
| Thermal correction to Energy=                |  | 0.245562                    |
| Thermal correction to Enthalpy=              |  | 0.246506                    |
| Thermal correction to Gibbs Free Energy=     |  | 0.182023                    |
| Sum of electronic and zero-point Energies=   |  | -876.697989                 |
| Sum of electronic and thermal Energies=      |  | -876.682251                 |
| Sum of electronic and thermal Enthalpies=    |  | -876.681307                 |
| Sum of electronic and thermal Free Energies= |  | -876.745790                 |

**G3MP2**

|                 |             |                    |             |
|-----------------|-------------|--------------------|-------------|
| Temperature=    | 298.150000  | Pressure=          | 1.000000    |
| E(ZPE)=         | 0.205199    | E(Thermal)=        | 0.222100    |
| E(QCISD(T))=    | -879.700011 | E(Empiric)=        | -0.426834   |
| DE(MP2)=        | -0.942222   |                    |             |
| G3MP2(0 K)=     | -880.863867 | G3MP2 Energy=      | -880.846967 |
| G3MP2 Enthalpy= | -880.846023 | G3MP2 Free Energy= | -880.913195 |

**[23]EMIM-NH<sub>2</sub>tz**

0 1

|   |              |             |              |
|---|--------------|-------------|--------------|
| 7 | -2.052952000 | 0.010465000 | -1.506430000 |
|---|--------------|-------------|--------------|



|   |              |              |              |
|---|--------------|--------------|--------------|
| 7 | -2.398738000 | 0.771624000  | -0.466833000 |
| 7 | -1.732367000 | -1.155121000 | -1.104667000 |
| 7 | -1.850851000 | -1.233302000 | 0.218162000  |
| 6 | -2.282591000 | -0.038221000 | 0.564649000  |
| 7 | 1.755429000  | -0.466079000 | -0.268977000 |
| 6 | 0.855265000  | 0.440159000  | -0.578781000 |
| 6 | 2.768425000  | 0.155375000  | 0.431214000  |
| 6 | 2.446644000  | 1.453274000  | 0.522578000  |
| 7 | 1.235625000  | 1.613486000  | -0.118563000 |
| 1 | -0.044212000 | 0.253895000  | -1.131923000 |
| 1 | 2.958301000  | 2.270858000  | 0.980684000  |
| 1 | 3.616956000  | -0.379483000 | 0.796701000  |
| 6 | 0.476559000  | 2.855486000  | -0.268317000 |
| 1 | -0.539676000 | 2.602560000  | -0.531763000 |
| 1 | 0.483423000  | 3.382200000  | 0.675052000  |
| 1 | 0.927350000  | 3.471185000  | -1.034127000 |
| 6 | 1.643165000  | -1.906488000 | -0.568915000 |
| 1 | 0.828131000  | -2.010172000 | -1.268100000 |
| 1 | 2.564960000  | -2.200717000 | -1.053888000 |
| 6 | 1.369211000  | -2.727967000 | 0.682456000  |
| 1 | 0.408962000  | -2.456287000 | 1.099593000  |
| 1 | 2.147103000  | -2.597364000 | 1.428681000  |
| 1 | 1.338145000  | -3.777629000 | 0.412472000  |
| 7 | -2.619602000 | 0.312024000  | 1.865804000  |
| 1 | -2.577450000 | 1.293550000  | 2.032931000  |
| 1 | -2.127870000 | -0.213974000 | 2.554916000  |

#### RHF

|                                              |                             |
|----------------------------------------------|-----------------------------|
| Zero-point correction=                       | 0.240668 (Hartree/Particle) |
| Thermal correction to Energy=                | 0.254298                    |
| Thermal correction to Enthalpy=              | 0.255243                    |
| Thermal correction to Gibbs Free Energy=     | 0.198442                    |
| Sum of electronic and zero-point Energies=   | -653.449526                 |
| Sum of electronic and thermal Energies=      | -653.435896                 |
| Sum of electronic and thermal Enthalpies=    | -653.434952                 |
| Sum of electronic and thermal Free Energies= | -653.491752                 |

#### G3MP2

|                 |             |                    |             |
|-----------------|-------------|--------------------|-------------|
| Temperature=    | 298.150000  | Pressure=          | 1.000000    |
| E (ZPE)=        | 0.214882    | E (Thermal)=       | 0.229575    |
| E (QCISD (T))=  | -655.899107 | E (Empiric)=       | -0.352602   |
| DE (MP2)=       | -0.721987   |                    |             |
| G3MP2 (0 K)=    | -656.758814 | G3MP2 Energy=      | -656.744121 |
| G3MP2 Enthalpy= | -656.743177 | G3MP2 Free Energy= | -656.802322 |

### Part-III : Theoretical density specific impulse of EILs

Table S11: Theoretical density specific impulse of EILs

| IL                                                       | Theoretical density (g/cc) | Isp (s) | Density Isp (s) |
|----------------------------------------------------------|----------------------------|---------|-----------------|
| [EMIm] <sup>+</sup> [BF <sub>4</sub> ] <sup>-</sup>      | 1.730                      | -       | -               |
| [EMIm] <sup>+</sup> [PF <sub>6</sub> ] <sup>-</sup>      | 1.907                      | 105     | 200             |
| [EMIm] <sup>+</sup> [dc] <sup>-</sup>                    | 1.684                      | 209     | 350             |
| [EMIm] <sup>+</sup> [trz] <sup>-</sup>                   | 1.592                      | 207     | 330             |
| [EMIm] <sup>+</sup> [dtrz] <sup>-</sup>                  | 1.469                      | 241     | 354             |
| [EMIm] <sup>+</sup> [dn] <sup>-</sup>                    | 1.485                      | 252     | 374             |
| [EMIm] <sup>+</sup> [tz] <sup>-</sup>                    | 1.545                      | 201     | 341             |
| [EMIm] <sup>+</sup> [Mtz] <sup>-</sup>                   | 1.282                      | 213     | 273             |
| [EMIm] <sup>+</sup> [CN-tz] <sup>-</sup>                 | 1.427                      | 221     | 315             |
| [EMIm] <sup>+</sup> [NH <sub>2</sub> -tz] <sup>-</sup>   | 1.172                      | 220     | 257             |
| [EMIm] <sup>+</sup> [NO <sub>2</sub> -tz] <sup>-</sup>   | 1.603                      | 239     | 383             |
| [EMIm] <sup>+</sup> [NO <sub>2</sub> -O-tz] <sup>-</sup> | 1.542                      | 246     | 379             |
| Hydrazine                                                | 0.947                      | 263     | 249             |

## Part-IV : Thermochemical calculation exemplified for [EMIm]<sup>+</sup>[dn]<sup>-</sup>

MF : C<sub>6</sub>N<sub>5</sub>O<sub>4</sub>H<sub>11</sub>

**G3MP2** (all energy values in au)

|                 |             |                    |             |
|-----------------|-------------|--------------------|-------------|
| Temperature=    | 298.150000  | Pressure=          | 1.000000    |
| E (ZPE)=        | 0.192940    | E(Thermal)=        | 0.208903    |
| E(QCISD(T))=    | -807.478986 | E(Empiric)=        | -0.389718   |
| DE(MP2)=        | -0.888131   |                    |             |
| G3MP2(0 K)=     | -808.563895 | G3MP2 Energy=      | -808.547932 |
| G3MP2 Enthalpy= | -808.546988 | G3MP2 Free Energy= | -808.610653 |

Table S12: Energy parameters for [EMIm]<sup>+</sup>[dn]<sup>-</sup> (Experimetnal values in kcal/mol and G3MP2 values in au).

| Element | n  | Experimental       |                     |             | Computaional values-G3MP2 |                  |          |           |
|---------|----|--------------------|---------------------|-------------|---------------------------|------------------|----------|-----------|
|         |    | $\Delta H_f^0(0K)$ | $H^0(298K)-H^0(0K)$ | $S^0(298K)$ | $\epsilon_0$              | $\epsilon_{ZPE}$ | Hcorr    | Gcorr     |
| H       | 11 | 51.63              | 1.01                | 27.418      | -0.500423                 | 0.000000         | 0.002360 | -0.010654 |
| C       | 6  | 169.98             | 0.25                | 37.787      | -37.787922                | 0.000000         | 0.002360 | -0.014545 |
| N       | 5  | 112.53             | 1.04                | 36.64       | -54.523780                | 0.000000         | 0.002360 | -0.015036 |
| O       | 4  | 58.99              | 1.04                | 38.494      | -74.988358                | 0.000000         | 0.002360 | -0.014952 |

(a) Atomization energy of the molecule,  $\sum D_o(M)$

$$\begin{aligned} \sum D_o(M) &= \sum n.X(\epsilon_0) - M(\epsilon_0 + ZPE) \\ &= [(11 * -0.500423) + (6 * -37.787922) + (5 * -54.523780) + (4 * -74.988358)] - [-808.547932] \\ &= 3.743415 \text{ H} * 627.51 \\ &= 2349.03 \text{ kcal/mol} \end{aligned}$$

(b) Heat of formation of the molecule at 0K,  $\Delta_f H^0(M, 0K)$

$$\begin{aligned} \Delta_f H^0(M, 0K) &= \sum n.\Delta_f H^0(X, 0K) - \sum D_o(M) \\ &= [(11*51.63) + (6*169.98) + (5*112.53) + (4* 58.99)] - 2349.03 \\ &= 2386.42 - 2349.03 \\ &= 37.39 \text{ kcal/mol} \end{aligned}$$

(c) Enthalpy correction for the molecule,  $H_M^0(298 K) - H_M^0(0 K)$

$$\begin{aligned} \text{(i) } H_M^0(298 K) - H_M^0(0 K) &= [H_{\text{corr}} - M(\epsilon_{ZPE})] \\ &= (0.231949 - 0.192940) \\ &= 0.039009 \text{ H} * 627.51 \\ &= 24.48 \text{ kcal/mol} \end{aligned}$$

$$\begin{aligned} \text{(ii) } \sum [n.(H^0(298K)-H^0(0K))] &= [(11*1.01) + (6*0.25) + (5*1.04) + (4*1.04)] \\ &= 21.97 \text{ kcal/mol} \end{aligned}$$

(d) Heat of formation of the molecule at 298K,  $\Delta_f H^0(M, 298K)$ .

$$\begin{aligned} \Delta_f H^0(M, 298K) &= \Delta_f H^0(M, 0K) + [H_M^0(298 K) - H_M^0(0 K)] - [\sum n.(H^0(298K)-H^0(0K))] \\ &= 37.39 + 24.48 - 21.97 \\ &= 39.90 \text{ kcal/mol} \\ &= \underline{166.86} \text{ kJ/mol} \end{aligned}$$

## Part-V : Energetics for conformers of [EMIm]<sup>+</sup>[dn]<sup>-</sup>

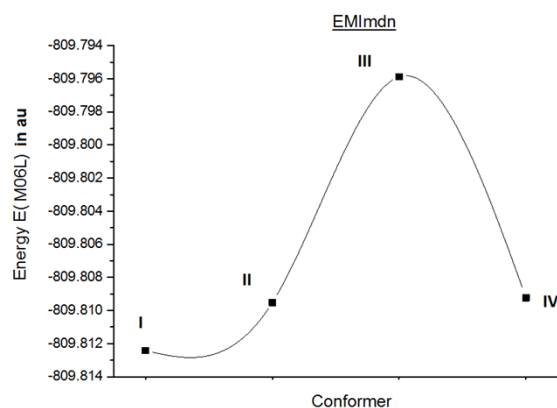

Table S13: Energy parameters for [EMIm]<sup>+</sup>[dn]<sup>-</sup> at M06L/6-311+g(d,p) level.

| Conformer | E (au)         | $\Delta_r H^\circ$ (M, 298K) (kJ/mol) | BE (kJ/mol) | $\Delta E^*$ (eV) | MK charge |
|-----------|----------------|---------------------------------------|-------------|-------------------|-----------|
| I         | -809.812420760 | 196.25                                | 356.1       | 3.32              | -0.850    |
| II        | -809.809514293 | 202.90                                | 364.3       | 3.48              | -0.809    |
| III       | -809.795883209 | 238.90                                | 320.9       | 2.80              | -0.870    |
| IV        | -809.809225258 | 204.40                                | 355.8       | 3.29              | -0.838    |

Table S14. Mole fraction of carbon in EIL and in presence of oxidiser

| Oxidiser                                               | 0.0% | 10%  | 20%  | 30%  | 40%  | 50%  | 60%  |
|--------------------------------------------------------|------|------|------|------|------|------|------|
| [EMIm] <sup>+</sup> [tz] <sup>-</sup>                  | 0.43 | 0.40 | 0.36 | 0.30 | 0.22 | 0.12 | 0.04 |
| [EMIm] <sup>+</sup> [mtz] <sup>-</sup>                 | 0.43 | 0.41 | 0.37 | 0.32 | 0.24 | 0.15 | 0.06 |
| [EMIm] <sup>+</sup> [dc] <sup>-</sup>                  | 0.50 | 0.47 | 0.42 | 0.35 | 0.27 | 0.17 | 0.07 |
| [EMIm] <sup>+</sup> [CNTz] <sup>-</sup>                | 0.47 | 0.43 | 0.38 | 0.30 | 0.22 | 0.12 | 0.03 |
| [EMIm] <sup>+</sup> [NH <sub>2</sub> tz] <sup>-</sup>  | 0.39 | 0.37 | 0.34 | 0.28 | 0.20 | 0.11 | 0.03 |
| [EMIm] <sup>+</sup> [trz] <sup>-</sup>                 | 0.46 | 0.44 | 0.40 | 0.34 | 0.27 | 0.17 | 0.07 |
| [EMIm] <sup>+</sup> [dtrz] <sup>-</sup>                | 0.32 | 0.25 | 0.18 | 0.11 | 0.05 | 0.00 | 0.00 |
| [EMIm] <sup>+</sup> [dn] <sup>-</sup>                  | 0.25 | 0.19 | 0.12 | 0.07 | 0.02 | 0.00 | 0.00 |
| [EMIm] <sup>+</sup> [NO <sub>2</sub> tz] <sup>-</sup>  | 0.37 | 0.31 | 0.25 | 0.17 | 0.09 | 0.03 | 0.00 |
| [EMIm] <sup>+</sup> [NO <sub>2</sub> Otz] <sup>-</sup> | 0.32 | 0.26 | 0.19 | 0.12 | 0.05 | 0.00 | 0.00 |

Table S15. Isp values (in s) of EILs at various HAN concentration.

| HAN (%) | [EMIm] <sup>+</sup> [tz] <sup>-</sup> | [EMIm] <sup>+</sup> [mtz] <sup>-</sup> | [EMIm] <sup>+</sup> [dc] <sup>-</sup> | [EMIm] <sup>+</sup> [CNTz] <sup>-</sup> | [EMIm] <sup>+</sup> [NH <sub>2</sub> tz] <sup>-</sup> | [EMIm] <sup>+</sup> [trz] <sup>-</sup> | [EMIm] <sup>+</sup> [dtrz] <sup>-</sup> | [EMIm] <sup>+</sup> [dn] <sup>-</sup> | [EMIm] <sup>+</sup> [NO <sub>2</sub> tz] <sup>-</sup> | [EMIm] <sup>+</sup> [NO <sub>2</sub> Otz] <sup>-</sup> |
|---------|---------------------------------------|----------------------------------------|---------------------------------------|-----------------------------------------|-------------------------------------------------------|----------------------------------------|-----------------------------------------|---------------------------------------|-------------------------------------------------------|--------------------------------------------------------|
| 0       | 221                                   | 213                                    | 208                                   | 221                                     | 219                                                   | 207                                    | 241                                     | 252                                   | 239                                                   | 246                                                    |
| 10      | 229                                   | 222                                    | 218                                   | 228                                     | 227                                                   | 217                                    | 246                                     | 256                                   | 244                                                   | 251                                                    |
| 20      | 236                                   | 230                                    | 226                                   | 235                                     | 235                                                   | 225                                    | 250                                     | 260                                   | 249                                                   | 255                                                    |
| 30      | 243                                   | 238                                    | 234                                   | 242                                     | 242                                                   | 234                                    | 258                                     | 272                                   | 254                                                   | 260                                                    |

|     |     |     |     |     |     |     |     |     |     |     |
|-----|-----|-----|-----|-----|-----|-----|-----|-----|-----|-----|
| 40  | 249 | 245 | 242 | 249 | 248 | 242 | 273 | 286 | 263 | 274 |
| 50  | 257 | 252 | 250 | 257 | 257 | 249 | 291 | 301 | 281 | 291 |
| 60  | 277 | 271 | 267 | 278 | 279 | 266 | 305 | 312 | 299 | 306 |
| 70  | 301 | 297 | 294 | 302 | 302 | 292 | 315 | 319 | 313 | 316 |
| 80  | 317 | 315 | 314 | 316 | 317 | 314 | 307 | 308 | 315 | 310 |
| 90  | 296 | 299 | 299 | 293 | 294 | 301 | 278 | 279 | 284 | 280 |
| 100 | 238 | 238 | 238 | 238 | 238 | 238 | 238 | 238 | 238 | 238 |

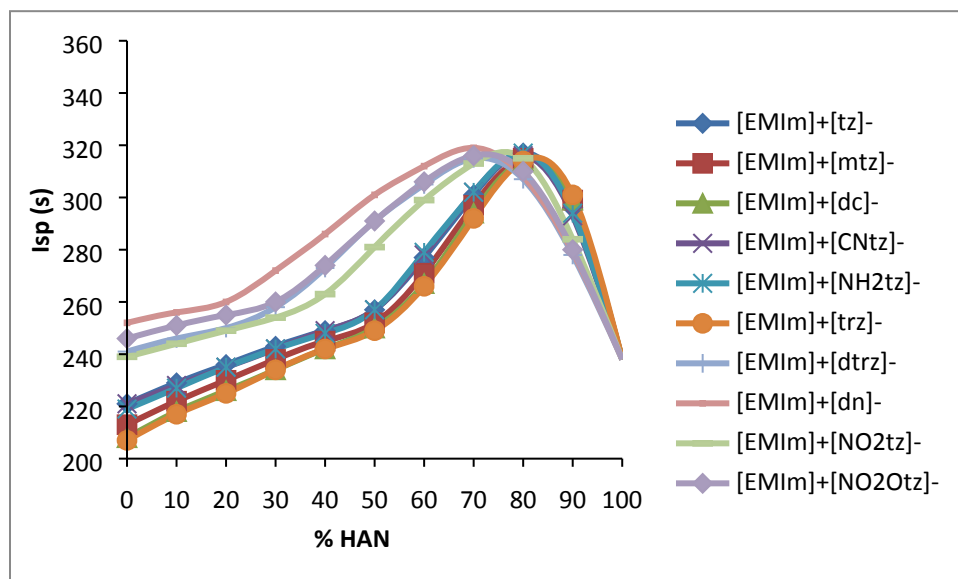

Figure S14: Plot showing the variation of Isp with respect to increasing concentration of HAN.
